# Supplementary material for: Differences in regional distribution and inequality in health-resource allocation at hospital and primary health centre levels: a longitudinal study in Shanghai, China
Source: PubMed Central journal article supplement — BMJ Open. 2020 Jul 19;10(7):e035635. doi: 10.1136/bmjopen-2019-035635 (PMC7371131; doi:10.1136/bmjopen-2019-035635), 2020-07-19
Supplement: bmjopen-2019-035635.draft_revisions.pdf [file bmjopen-2019-035635.draft_revisions.pdf]

# BMJ Open

BMJ Open is committed to open peer review. As part of this commitment we make the peer review history of every article we publish publicly available.

When an article is published we post the peer reviewers' comments and the authors' responses online. We also post the versions of the paper that were used during peer review. These are the versions that the peer review comments apply to.

The versions of the paper that follow are the versions that were submitted during the peer review process. They are not the versions of record or the final published versions. They should not be cited or distributed as the published version of this manuscript.

BMJ Open is an open access journal and the full, final, typeset and author-corrected version of record of the manuscript is available on our site with no access controls, subscription charges or pay-per-view fees (<http://bmjopen.bmj.com>).

If you have any questions on BMJ Open's open peer review process please email [info.bmjopen@bmj.com](mailto:info.bmjopen@bmj.com)

# BMJ Open

## A Hierarchical Regional difference and inequality of health resource allocation in Shanghai from 2010 to 2016

|                               |                                                                                                                                                                                                                                                                                                                                                                                                                                                                                                                                                                                                                                                                          |
|-------------------------------|--------------------------------------------------------------------------------------------------------------------------------------------------------------------------------------------------------------------------------------------------------------------------------------------------------------------------------------------------------------------------------------------------------------------------------------------------------------------------------------------------------------------------------------------------------------------------------------------------------------------------------------------------------------------------|
| Journal:                      | <i>BMJ Open</i>                                                                                                                                                                                                                                                                                                                                                                                                                                                                                                                                                                                                                                                          |
| Manuscript ID                 | bmjopen-2019-035635                                                                                                                                                                                                                                                                                                                                                                                                                                                                                                                                                                                                                                                      |
| Article Type:                 | Original research                                                                                                                                                                                                                                                                                                                                                                                                                                                                                                                                                                                                                                                        |
| Date Submitted by the Author: | 08-Nov-2019                                                                                                                                                                                                                                                                                                                                                                                                                                                                                                                                                                                                                                                              |
| Complete List of Authors:     | <p>dong, enhong; Shanghai University of Medicine and Health Sciences, Wang, Hongmei; University of Nebraska Medical Center<br/>           chen, minjie; Shanghai Jiao Tong University School of Medicine Affiliated Renji Hospital<br/>           Chen, Li-Wu; University of Nebraska Medical Center, Health Services Research and Administration<br/>           xu, ting; Shanghai University of Medicine and Health Sciences, School of Nursing and Health Management<br/>           wang, tao; Tongji University School of Medicine, Shanghai East Hospital<br/>           zhang, lufa; Shanghai Jiao Tong University, School of International and Public Affairs</p> |
| Keywords:                     | Health economics < HEALTH SERVICES ADMINISTRATION & MANAGEMENT, HEALTH ECONOMICS, Human resource management < HEALTH SERVICES ADMINISTRATION & MANAGEMENT                                                                                                                                                                                                                                                                                                                                                                                                                                                                                                                |
|                               |                                                                                                                                                                                                                                                                                                                                                                                                                                                                                                                                                                                                                                                                          |

SCHOLARONE™  
Manuscripts

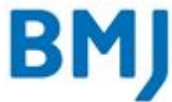

I, the Submitting Author has the right to grant and does grant on behalf of all authors of the Work (as defined in the below author licence), an exclusive licence and/or a non-exclusive licence for contributions from authors who are: i) UK Crown employees; ii) where BMJ has agreed a CC-BY licence shall apply, and/or iii) in accordance with the terms applicable for US Federal Government officers or employees acting as part of their official duties; on a worldwide, perpetual, irrevocable, royalty-free basis to BMJ Publishing Group Ltd ("BMJ") its licensees and where the relevant Journal is co-owned by BMJ to the co-owners of the Journal, to publish the Work in this journal and any other BMJ products and to exploit all rights, as set out in our [licence](#).

The Submitting Author accepts and understands that any supply made under these terms is made by BMJ to the Submitting Author unless you are acting as an employee on behalf of your employer or a postgraduate student of an affiliated institution which is paying any applicable article publishing charge ("APC") for Open Access articles. Where the Submitting Author wishes to make the Work available on an Open Access basis (and intends to pay the relevant APC), the terms of reuse of such Open Access shall be governed by a Creative Commons licence – details of these licences and which [Creative Commons](#) licence will apply to this Work are set out in our licence referred to above.

Other than as permitted in any relevant BMJ Author's Self Archiving Policies, I confirm this Work has not been accepted for publication elsewhere, is not being considered for publication elsewhere and does not duplicate material already published. I confirm all authors consent to publication of this Work and authorise the granting of this licence.

## Title page

**A Hierarchical Regional difference and inequality of health resource allocation  
in Shanghai from 2010 to 2016**

Enhong Dong<sup>1</sup>, Hongmei Wang<sup>2</sup>, Minjie Chen<sup>3</sup>, Liwu Chen<sup>2</sup>, Ting Xu,<sup>1</sup> Tao Wang<sup>45\*</sup>, Lufa Zhang<sup>6\*</sup>

<sup>1</sup> School of Nursing and Health Management, Shanghai University of medicine & Health Science, 279 Zhouzhu Road, Pudong new District, Shanghai 201318, Shanghai, China. <sup>2</sup> Department of Health Services Research & Administration, College of Public Health, 984350 University Nebraska Medical Center, Omaha, NE 68198-4350; <sup>3</sup> Department of Outpatient and Emergency, Renji Hospital Affiliated to Shanghai Jiao Tong University School of Medicine, NO.160, Pujian Road, Pudong new District, Shanghai, 200127, China. <sup>4</sup> Department of Emergency, Shanghai East Hospital, Tongji University School of Medicine, Shanghai 200120, China. <sup>5</sup> College of Arts and Media, Tongji University, Shanghai 200092, China. <sup>6</sup> School of International and Public Affairs, Shanghai Jiao Tong University, 1954 Huashan Road, Xuhui District, Shanghai 200030, Shanghai, China.

\*Corresponding author: E-mail: Tao Wang [happywt0403@sina.com](mailto:happywt0403@sina.com), Lufa Zhang [zhanglf@sjtu.edu.cn](mailto:zhanglf@sjtu.edu.cn)

## Abstract

**Objectives** Aiming to analyze the hierarchical distribution of health resource in hospitals and primary health centers (PHCs ) in Shanghai over 7 years.

**Setting** A longitudinal study was conducted to analyze health resource allocation status and time trends in shanghai with the data from the Shanghai Yearbook dataset from 2010-2016.

**Participants:** Seven-year data from 2010-2016 in Shanghai were taken for analysis and inclusion and exclusion criteria of the study indicators were specified

**Outcomes measure** 10 health resource indicators were used to measure hospital and PHC health resource from a hierarchical perspective. The Theil index was also calculated to measure the distribution inequality of health resource.

**Results** The numbers and values of health resource per 1000 population in hospitals and PHCs all increased across all the city and districts, and equipment grew faster than health workforce totally. Of all districts central districts had higher ratios than suburban districts both in doctors and equipment, and grew faster than suburban ones in the former indicator and reversely slower in latter indicator for hospitals and PHCs from 2010 to 2016. The Theil indexes in hospitals had higher values than those in PHCs for the equipment. The Theil indexes of the indicators all showed downward time trends in hospitals and PHCs but for the technicians and doctors in hospitals from 2010 to 2016.

**Conclusion:** The increase of the health resource and the inequality improvement of the resource allocation during 7 years in Shanghai indicated that measures Shanghai

1  
2  
3  
4 government had taken to deepen new-round China health care reform was successful  
5  
6 since 2009. However, there still existed resource distribution regional difference  
7  
8 between urban and rural areas and inequality across different health institutions. It is  
9  
10 crucial for shanghai government to make deeper efforts to achieve regional balance  
11  
12 and improve the fairness of health resource allocation in the future.  
13  
14  
15

16  
17 **Keywords:** Health Resource, Regional Difference, Hospital, PHC  
18

### 19 **Strengths and limitations of this study**

20  
21  
22 ▶▶ A longitudinal study was conducted with the data from the Shanghai Yearbook  
23  
24 dataset from 2010-2016, analyzing the health resource allocation status, time trends and  
25  
26 inequality in hospitals and primary health centers (PHCs) in Shanghai to confirm  
27  
28 whether the China's new-round health care reform since 2009 worked. Few previous  
29  
30 studies like this paper focus on the changes of health resource allocation over time as  
31  
32 well as its association with China's new-round health care reform since 2009.  
33  
34  
35

36  
37 ▶▶ From a hierarchical view, the study investigated the static and dynamic status of  
38  
39 the health workforce and equipment in hospitals and PHCs during the 7 years (from  
40  
41 2010 to 2016) with the 10 main indicators, by comparing the amount per 1000  
42  
43 population and growth rate of health resource between the hospitals and PHCs ,center  
44  
45 and rural administrative divisions in that period. For the distribution inequality of health  
46  
47 resource across the city and 16 districts, the Theil index was also calculated to identify  
48  
49 the fairness of health workforce and medical equipment.  
50  
51  
52

53  
54 ▶▶ Although this study was conducted in China, it offers some lessons to other  
55  
56 developing countries that are implementing health care reform to ensure their people to  
57  
58  
59  
60

1  
2  
3  
4 benefit from the balance of health resource allocation and improvement of the  
5  
6 distribution inequality of health resource, which is a common issue in the world.  
7

8  
9 ▶▶ This study can only reflect the health resource allocation status in Shanghai at the  
10  
11 cut-off (till 2016). A new study on changes of health resource allocation from 2017  
12  
13 until now and comparability of this study with that prospective research can be a future  
14  
15 work when data are available.  
16  
17

18  
19 ▶▶ The study chooses indicators for the quality of health resources from hierarchical  
20  
21 perspective rather than indicators of the quality of health services, which probably  
22  
23 missed some unmeasured indicators influencing the differences observed. Caution  
24  
25 needs to be taken when generalising the findings.  
26  
27  
28  
29  
30  
31  
32  
33  
34  
35  
36  
37  
38  
39  
40  
41  
42  
43  
44  
45  
46  
47  
48  
49  
50  
51  
52  
53  
54  
55  
56  
57  
58  
59  
60

## Background

Allocating reasonably health resources is essential to achieve health service equity, better population health, and society harmony<sup>1-3</sup>. However, disparities of health resources exist between urban and rural areas, across various types of medical institutions, and these inequalities are being further widened currently in China<sup>4-7</sup>. Even within Shanghai, a city with a largest scale of population in China, the regional difference in the health resource allocation across districts is significant as health resources are mainly allocated in the center areas of the city<sup>8</sup>.

Since 2009, when China launched Opinions on Deepening Reform of the Medical and Health care System<sup>9</sup>, a number of policies were released, including the Guidelines to Promote the Construction of Graded Diagnosis and Treatment System<sup>10</sup>, the "Healthy China 2030" Planning Outline, the National Fitness Program (2016-2020), the 13th Five-Year Plan for Medical and Health Service Development, and the Plan for Deepening Reform of the Medical and Healthcare System During the 13th Five-Year Plan Period (2016-2020). Through optimizing the structures of medical institutions, the Chinese government has put forward a "two-step" goal: a proper reasonable medical procedure will be built, in which the patients can be diagnosed primarily, referred with two ways, linked up or down, divided clearly and treated rapidly; a sound integrated medical and health care system with Chinese characteristics will be established, which is integral, complementary, collaborative and efficient. Accordingly, Shanghai government also implemented corresponding measures to change the imbalance of health resource allocation and public health care system, conforming tightly to the



1  
2  
3  
4 national health reform strategies and guidelines mentioned above. As a result of these  
5  
6 measures, the quantity of health doctors, nurses and medical equipment had increased  
7  
8  
9 and the distribution of health resources had been more balanced<sup>8,11-12</sup>.

10  
11 Some studies have explored inequality in health resources and health service within  
12  
13 hospitals and the primary health centers (PHCs) in China<sup>6,13-17</sup>, and those studies have  
14  
15 shown that since 2009, a new-round medical reform in China had reduced health  
16  
17 resources inequality across provinces or cities<sup>5,18</sup>. However, other studies have found  
18  
19 that China's immense investment in the new health reform since 2009 not to be  
20  
21 successful in reducing health resource allocation inequality in PHCs<sup>6,17</sup>. Existing  
22  
23 studies examined the quantity and inequality of health resource in China, while they  
24  
25 overlooked the changes of health resource allocation over time as well as its  
26  
27 association with China's health care reform. Considering the overall goal of china's  
28  
29 new healthcare guidelines and plans that promote a more equitable and efficient  
30  
31 distribution of healthcare resources, it is essential to study the changes of quantity and  
32  
33 equity of health resource allocation in China over time since then.  
34  
35  
36  
37

38  
39 Therefore, the purpose of this study was 1) to depict hierarchically distribution of  
40  
41 health resource in hospitals and PHCs over 7 years (2010–2016) in Shanghai; 2) to  
42  
43 provide policy implications to optimize health resource allocation in hospitals and  
44  
45 PHCs to improve quality and quantity of health services and achieve an equitable health  
46  
47 system for China.  
48  
49

## 50 51 **Methods**

### 52 53 **Data resource**

54  
55  
56 This study used the data from the Shanghai Medical Statistical Yearbook from 2010-  
57  
58 2016, and the Shanghai Statistical Yearbook from 2010-2016, respectively published  
59  
60

1  
2  
3  
4 by the Shanghai Health Commission and the Shanghai Statistics Bureau. since China  
5  
6 has pushed the hospitals and primary health centers (PHCs) to set up a hierarchical  
7  
8 medical system to improve the health service quality, we measure health resource  
9  
10 allocation to evaluate the effect of these policies on the different institutions: hospitals  
11  
12 and PHCs. The indicators used included the number of health technicians in hospitals  
13  
14 and PHCs. The indicators used included the number of health technicians in hospitals  
15  
16 or PHCs, doctors in hospitals or PHCs, total value of medical equipment above  
17  
18 ¥ 10,000 in hospitals or PHCs, number of medical equipment valued above ¥ 10,000  
19  
20 in hospitals or PHCs, medical equipment above ¥ 1,000,000 in hospitals and valued  
21  
22 ¥ 500,000-690,000 in PHCs were also taken from the Shanghai Medical Statistical  
23  
24 Yearbook from 2010-2016 ( Table 1 ) . Per capita measures of the above indicators  
25  
26 were calculated after obtaining the annual population in the whole city and in every  
27  
28 different administrative district from the Shanghai Statistical Yearbook from 2010-  
29  
30 2016. Specially, inclusion and exclusion criteria of these indicators are shown as  
31  
32 following.

33  
34  
35 1) Doctors refer to the professionals who held a physician practicing certificate  
36  
37 including the practicing physicians and practicing physician assistants in China.  
38  
39 technicians refer to the workforce who assist medical staff complete tasks around their  
40  
41 assigned unit or clinic's and accommodate patient needs, including pharmacists,  
42  
43 radiologists except of registered nurses. Those who engaged in the management of  
44  
45 health workers are not included as health workforce, such as president, vice president,  
46  
47 party secretary.  
48  
49  
50  
51  
52  
53  
54  
55  
56  
57  
58  
59  
60

1  
2  
3  
4 2) Medical equipment refers to durable equipment as it is intended to withstand repeated  
5  
6 use by professional and patients, including diagnostic equipment including medical  
7  
8 imaging machines, such as ultrasound and MRI machines, PET and CT scanners, and  
9  
10 x-ray machines, and treatment equipment including infusion pumps, medical lasers and  
11  
12 LASIK surgical machines and other medical equipment in health institutions of China.  
13  
14

15  
16  
17 Shanghai is one of the four direct-controlled municipalities of People's Republic of  
18  
19 China, and is further divided into 16 districts, among which there is 7 urban districts  
20  
21 and 9 suburban ones. Urban administrative divisions are as follows: Huangpu, Xuhui,  
22  
23 Changingg, Jing'an, Putuo, Hongkou and Yangpu, and rural ones are Minhang,  
24  
25 Baoshan, Jiading, Pudong new, Jinshan, Songjiang, Qingpu, Fengxian and Chongming.  
26  
27 During seven years from 2010 to 2016, Shanghai city had experienced three  
28  
29 administration division merges aiming to facilitate the long-term development of all the  
30  
31 districts involved, enhance the administrative efficiency of urban function and resource  
32  
33 distribution for the city, as well as reduce administrative costs. Luwan district was  
34  
35 merged to neighboring one to form a new Huangpu district in 2011, Zhabei was merged  
36  
37 into Jing'an district in 2015, and Chongming county was upgraded to Chongming  
38  
39 district in 2016. To maintain data comparability, we analyzed the data of the new 16  
40  
41 administration divisions, and integrated the data of the two merged districts: Luwan and  
42  
43 Zhabei into that of Huangpu and Jing'an respectively.  
44  
45  
46  
47  
48  
49  
50  
51

## 52 53 **1.2 Data analysis**

54  
55  
56 There are many measures to evaluate the equity of the health resource allocation,  
57  
58 such as Lorenz curve, Gini coefficient and the Theil index etc. The Theil index is a  
59  
60

1  
2  
3  
4 statistic primarily used to measure income inequality or other economic phenomena  
5  
6 among different individuals and varied groups. It is a special case of the generalized  
7  
8 entropy index and is one of the most widely used measures of the inequality of regional  
9  
10 economic development. It was proposed by econometrician Henri Theil at the Erasmus  
11  
12 University Rotterdam<sup>19</sup>. The Theil index can be formulated as follows:  
13  
14

$$15 \quad T = \frac{1}{n} \sum_{i=1}^n \frac{y_i}{\bar{y}} \log\left(\frac{y_i}{\bar{y}}\right) \quad (1)$$

16  
17  
18 In formula (1),  $T$  is the Theil index represents the income allocation inequality,  $y_i$  and  
19  
20  $\bar{y}$  represents the income of individual  $i$  and the average income of the population  
21  
22 respectively.  
23  
24  
25  
26

27  
28 The Theil index has another form to measure the inequality between different groups,  
29  
30 e.g. the between-region difference. The formula could be defined as follows:  
31  
32

$$33 \quad T = \sum_{i=1}^k w_i \ln\left(\frac{w_i}{e_i}\right) \quad (2)$$

34  
35  
36 In (2) above,  $w_i$  represents the proportion of income of group  $i$  accounting for all the  
37  
38 income of total groups.  $e_i$  represents the proportion of population in group  $i$  accounting  
39  
40 for overall population of the groups. In this study, we defined  $w_i$  as the proportion of  
41  
42 health resources in district  $i$  accounting for the resources of the whole city,  $e_i$  as the  
43  
44 proportion of the population in district  $i$  accounting for overall population of the city.  
45  
46  
47  
48  
49

## 50 **Results**

### 51 **Time trends in hierarchical health resource allocation of Shanghai from 2010** 52 53 54 55 56 **to 2016**

1  
2  
3  
4 The amount and growth rate of health resource allocation changes in hospitals and  
5  
6 PHCs in shanghai were shown in Table 2. As shown in Table 2, the amount of health  
7  
8 resource in hospitals and PHCs increased gradually from 2010 to 2016, the numbers  
9  
10 and value of health resource per 1000 population all increased and equipment grew  
11  
12 faster than health workforce in hospitals and PHCs totally. For example, the number of  
13  
14 equipment valued above ¥10,000 per 1000 and above ¥1,000,000 per 1000 in hospitals  
15  
16 increased by 73.9% and by 122.7% respectively, and the technicians per 1000 and  
17  
18 doctors per 1000 in hospitals increased by 30.6% and by 25.5%, respectively from 2010  
19  
20 to 2016, more than twice the corresponding numbers of technicians and doctors in PHC  
21  
22 in the same period .  
23  
24  
25  
26  
27  
28  
29

30 From an administrative division prospective, from 2010 to 2016, an increasing trend  
31  
32 can also be observed in the number of doctors per 1000 population and equipment per  
33  
34 1000 population both in hospitals and PHCs across all districts, except for Chongming  
35  
36 division with an unexpected decrease from 0.94 in 2010 to 0.87 in 2016 for the number  
37  
38 of equipment valued above ¥ 10,000 per 1000 population in PHCs. In common, for  
39  
40 every district, a similar trend can also be seen that the number of equipment per 1000  
41  
42 population grew faster than that of doctors per 1000 population either in hospital or  
43  
44 PHCs from 2010 to 2016. Noticeably, wherever in hospitals and PHCs, central districts  
45  
46 had higher ratios than suburban districts both in the number of doctors per 1000  
47  
48 population and equipment per 1000 population, which indicated an unchanged  
49  
50 distribution concentration of health resource among central areas other than rural ones  
51  
52 in Shanghai. When compared with the number of doctors per 1000 population in  
53  
54  
55  
56  
57  
58  
59  
60

1  
2  
3  
4 hospitals, central districts grew faster than suburban ones from 2010 to 2016 (Fig.1 (a)  
5  
6 and (b). For example, in hospitals, Xuhui district had an increase by 39.47%, Hongkou  
7  
8 got 28.57%, and Huangpu district got 28.57% in the ratio of doctors per 1000 from  
9  
10 2010 to 2016, while Songjiang and Qingpu just increased by under 1% in the same  
11  
12 period. Even Fengxian, the fastest growing division for ratios of doctors across all the  
13  
14 rural districts, just increased by 14.29%, still lower than 15% that was the average  
15  
16 growth level for hospitals in central districts during seven years. Meanwhile, in PHCs,  
17  
18 neither for central districts or suburban ones had a markable increase-by rate in the  
19  
20 number of doctors per 1000 population during this period. Reversely, for the number  
21  
22 of equipment per 1000 population (Fig.2 (a) and (b)), there was a different trend that  
23  
24 both in hospitals and PHCs central districts grew slower than suburban ones in the same  
25  
26 period. For example, from 2010 to 2016, in hospitals, Huangpu, Xuhui, Jing'an and  
27  
28 Hongkou district all increase with the growth rates of 22.75%, 76.16%, 157.40%, and  
29  
30 354.23% for the ratios of equipment, respectively, while Songjiang, Qingpu and  
31  
32 Fengxian all experienced rapid development more than five-fold times for per capita  
33  
34 equipment in this period. Similarly, in PHCs, Changning, Putuo, Jing'an and Hongkou  
35  
36 all doubled this number, while Qingpu and Jinshan increased by more than two times  
37  
38 for this ratio of equipment from 2010 to 2016.

### 50 **Time trends of Theil index of hierarchical health resource allocation in shanghai** 51 52 **from 2010 to 2016** 53 54

55  
56 Seen from Table 3, Fig. 3, both inequality and trends of the Theil indexes of the  
57  
58 health resources allocation in hospitals and PHCs were shown over time. For the  
59  
60

1  
2  
3  
4 inequality, the Theil indexes in hospitals had higher values than those in PHCs for  
5  
6 overall health resource, especially for the equipment, indicating a more unfairness of  
7  
8 health resource allocation in hospitals than in PHCs in Shanghai during this period. For  
9  
10 example, in 2016, the Theil indexes of the numbers of technicians and doctors in  
11  
12 hospitals were 0.3344 and 0.3401, respectively, while the corresponding indexes in  
13  
14 PHCs were 0.0186 and 0.0178, respectively. The Theil index of the numbers of total  
15  
16 value of equipment above ¥ 10,000, number of equipment above ¥ 10,000 in  
17  
18 hospitals were 0.5282 and 0.4562 respectively, while the corresponding indexes in  
19  
20 PHCs were 0.0482 and 0.0570, respectively.  
21  
22  
23  
24  
25

26  
27 For the trends of the Theil index in health resource in Shanghai from 2010 to 2016,  
28  
29 both in hospitals and PHCs the Theil indexes of the indicators showed a decline except  
30  
31 for the technicians and doctors in hospitals, demonstrating the inequality improvement  
32  
33 in health institutions for most of these health resource indicators of Shanghai over seven  
34  
35 years. From 2010 to 2016, the Theil indexes of all the equipment indicators in hospitals  
36  
37 ,total value of equipment above ¥ 10,000 , number of equipment above ¥ 10,000 ,  
38  
39 and number of equipment above ¥ 1,000,000, all showed a decline, despite a bit  
40  
41 increase from 2013 to 2014,which indicated that the inequality of hardware  
42  
43 construction in hospitals had been improved in those years. Similarly, for the Theil  
44  
45 indexes of the healthcare workforce in PHCs, number of technicians, and number of  
46  
47 doctors, there all showed consistently a downward trend during the period. Also, those  
48  
49 indexes of total value of equipment above ¥ 10,000, number of equipment above  
50  
51 ¥ 10,000 and number of equipment valued ¥ 500,000-690,000 in PHCs were shown an  
52  
53  
54  
55  
56  
57  
58  
59  
60

1  
2  
3  
4 ending decrease after experiencing some fluctuation in this period. However, for the  
5  
6 Theil indexes of the healthcare workforce in hospitals, a reverse trend were both  
7  
8 observed in the number of technicians and doctors during this period, for example, the  
9  
10 Theil index of technicians in hospitals decreased from 0.2712 in 2010 to 0.2479 in 2013,  
11  
12 followed by an increase until 0.3344 in 2016, this trend demonstrated that problem of  
13  
14 the healthcare workforce allocation inequality in hospitals had not been solved in those  
15  
16  
17  
18  
19 years.

## 21 **Discussion**

### 22 **Summary of principal findings**

23  
24  
25 This study analyzed the time trends and inequality of health resource allocation of  
26  
27 shanghai from a hierarchical perspective, finding an increasing, growing trend in  
28  
29 amount and equality improvement in health resource allocation from 2010 to 2016.  
30  
31 However there still existed situation in which health resource distribution differentiated  
32  
33 regionally across different districts, and equipment and health workforce distribution  
34  
35 showed serious inequalities between hospitals and PHCs in shanghai.  
36  
37  
38  
39  
40  
41  
42

### 43 **Implications for policy and practice**

44  
45 Firstly, the study found that the number of technicians, number of doctors, total value  
46  
47 of equipment above ¥10,000 , number of equipment above ¥10,000 in hospitals and  
48  
49 PHCs, number of equipment valued above ¥1,000,000 in hospitals, and number of  
50  
51 equipment valued ¥500,000-690,000 in PHCs were all increasing during seven years.  
52  
53 These results showed that achievement of Chinese government 's efforts to make  
54  
55 healthcare system reform operate smoothly to provide a safe, efficient and convenient  
56  
57  
58  
59  
60



1  
2  
3  
4 health service for the people over past 7 years. To expand and optimize the health  
5  
6 resource, on the supply-side, according to "Healthy China 2030" Planning Outline and  
7  
8  
9 other health policy plans, China had integrated the health subsystems by investing  
10  
11 financially in health institutions to multiple equipment, recruit and cultivate technicians,  
12  
13 doctors, and making health institutions function re-oriented, updating healthcare  
14  
15 service model based on the population health, to present a collaborative hierarchical  
16  
17 medical system meeting people's health care demands <sup>20-23</sup>. It included not only  
18  
19 perfecting the plans for geographical distribution of health resource across different  
20  
21 regions and districts<sup>24</sup>, but also keeping the hierarchical allocation balanced  
22  
23 dynamically between hospitals and PHCs. On the demand-side, he also educated the  
24  
25 people with "big-health" concept to foster a healthy life style , and re-designed medical  
26  
27 insurance to widen coverage among more poorer people<sup>25</sup>, making more and more  
28  
29 patients have access to health resource reasonably. So, these measures mentioned above  
30  
31 China and Shanghai government had resulted in increase of technicians, doctors and  
32  
33 equipment across different institutions and districts on one hand, and inequality  
34  
35 improvement of these health resource on the other hand in Shanghai from 2010 to 2016.  
36  
37 Many previous studies supported the result<sup>17,26-27</sup>.

38  
39  
40  
41  
42  
43  
44  
45  
46  
47  
48 Secondly, this study observed the regional difference in health resource allocation of  
49  
50 Shanghai from 2010 to 2016. For example, unbalanced development of health programs  
51  
52 between urban and rural areas still existed, resulting in the an abnormal phenomena  
53  
54 named "inverted triangle" instead of "equilateral triangle, meaning that more and more  
55  
56 technicians and doctors in PHCs were attracted to tertiary public hospitals and specialty  
57  
58  
59  
60

1  
2  
3  
4 public hospitals, causing a loss of medical human resource in the primary health care.  
5  
6 It maybe was because of shortages of primary health care, e.g. lower salary and  
7  
8 constrained career advance caused primary health care doctors and nurses have to leave  
9  
10 to work at larger hospitals. Another reason is that more lager hospitals were distributed  
11  
12 in urban districts than in rural ones, attracting more and more health workforce in  
13  
14 hospitals in urban areas. Some previous studies also contributed to these “inverted  
15  
16 triangle” results<sup>5,28</sup>. One reason for suburban districts grew faster than urban ones in  
17  
18 the numbers of equipment in hospitals and PHCs, was that based on fewer health  
19  
20 resource and slower development for health institutions of rural areas ,it was urgent and  
21  
22 important to expand equipment in health institutions and easy to achieve this goal than  
23  
24 to recruit and educate doctors and nurses in a short time when invested in vastly in  
25  
26 Shanghai since 2009. This regional difference result was similar to previous studies  
27  
28 finding the rapid growing of equipment in hospitals and PHCs in suburban areas in  
29  
30 China<sup>29-30</sup>.

31  
32  
33  
34  
35  
36  
37  
38  
39  
40 Thirdly, the present study confirms the inequality among technicians, doctors, and  
41  
42 equipment in health institutions from 2010 to 2016. On one hand, the Theil indexes of  
43  
44 health workforce in hospitals, such as technicians and doctors, were increasing during  
45  
46 this period, indicating a worsening distribution inequality of health resource though  
47  
48 increased during the period. The reason for this is that the elevated provision of human  
49  
50 resources does not necessarily indicate a decline in inequity, as has been proven in other  
51  
52 countries<sup>31-34</sup>. As mentioned in regional difference above, more and more technicians,  
53  
54 doctors would like to flow into larger urban hospitals rather than rural hospitals, new  
55  
56  
57  
58  
59  
60

1  
2  
3  
4 hospitals or private hospitals for sake of higher salary and more access to their own  
5  
6 career development there. Another reason was that hospitals both in urban areas and  
7  
8 rural ones would compete for more patients and profits , because of the Matthew effect  
9  
10 in medical field , indicating that more and more patients were seeing doctors in famous  
11  
12 general or tertiary hospitals in urban areas, and fewer patients would trust doctors in  
13  
14 not-famous hospitals, leading to more human resource in health institutions pouring  
15  
16 into larger hospitals, further exacerbating the disparities between larger hospitals and  
17  
18 small ones. This finding was similar to some previous studies which all confirmed the  
19  
20 health workforce distribution gap between urban health institutions and rural ones<sup>35-37</sup>.  
21  
22 On the other hand, hospitals had higher Theil indexes than PHCs in all the number of  
23  
24 health resource, especially equipment in shanghai at every year, demonstrating another  
25  
26 unbalanced distribution of health resource between hospitals and PHCs. The  
27  
28 explanation for this is that with rapid development of hospitals, many hospitals had  
29  
30 gained high profits, and continuously invested in recruiting and educating doctors and  
31  
32 buying more large and advanced medical equipment to meet more and more patients'  
33  
34 medical needs unreasonably, resulting in the over-investment of health workforce and  
35  
36 equipment in hospitals, meanwhile PHCs had not enough to invest in these health  
37  
38 resource because of fewer patients and fewer profits to compete for with hospitals. This  
39  
40 result was consistent with findings reported by Zhang T. et al.(2017)<sup>38</sup> and Wang YY.  
41  
42 et al.(2017)<sup>26</sup>.  
43  
44  
45  
46  
47  
48  
49  
50  
51  
52  
53  
54  
55

56 The present study had several limitations. First, the data used in this manuscript can  
57  
58 only reflect the health resource allocation status in Shanghai at the cut-off, for we can  
59  
60

1  
2  
3  
4 only gain the data from the Chinese Yellowbooks which are often published officially  
5  
6 at least two years later, so it was not possible to provide a complete reflection of the  
7  
8 whole picture. A new study on changes of health resource allocation from 2017 until  
9  
10 now and comparability of this study with that prospective research can be a future work  
11  
12 when data are available. Second, the study did not consider the effect of the population  
13  
14 health outcomes on the health resource allocation. According to the (health capacity  
15  
16 paradigm, HCP) theory <sup>39</sup>, the population health status in a region will have mutual  
17  
18 effect on health resource allocation in that area. For the convenience of the study, we  
19  
20 do not take account of these factors that may affect the results. Third, in this study, we  
21  
22 choose indicators for the quality of health resources from hierarchical perspective rather  
23  
24 than indicators of the quality of health services. There might be other unmeasured  
25  
26 indicators influencing the differences observed, integrating the indicators of health  
27  
28 resource used in this present study with ones of health service quality will get a sounder  
29  
30 conclusion in the future.  
31  
32  
33  
34  
35  
36  
37  
38

## 39 40 **Conclusion**

41  
42  
43 Based on the analysis above, we can find that the increase of the health resource and  
44  
45 the inequality improvement of the resource allocation in Shanghai from 2010 to 2016.  
46  
47 This revealed that measures Chinese government had taken to ensure technicians,  
48  
49 doctors, and equipment in hospitals and PHCs for the people to deepen China health  
50  
51 care reform was successful since 2009. However, there still existed resource  
52  
53 distribution regional difference between urban and rural areas and inequality across  
54  
55 different health institutions. To achieve the regional balance of health resource  
56  
57  
58  
59  
60

1  
2  
3  
4 allocation between central and rural areas in Shanghai, a comprehensive solution is to  
5  
6 raise wages and improve working conditions of the health workers to prevent them from  
7  
8 flowing to urban hospitals is needed to change the situation of “inverted triangle”  
9  
10 and eliminate the regional difference between hospitals and PHCs for the government.  
11  
12 Some motivational efforts for him to make that cultivating and training more medical  
13  
14 students with high degree and encouraging them to work in rural areas are also needed.  
15  
16  
17 Lastly , Some policies should not only pay attention to the health workforce  
18  
19 distribution imbalance between larger urban hospitals and smaller ones, such as salary  
20  
21 raising for doctors and nurses in small-scale suburban hospitals and implementing of  
22  
23 job performance evaluation reform in hospitals, but also focus on the eliminate  
24  
25 redundant equipment investment in hospitals and health workforce disparity between  
26  
27 hospitals and PHCs, such as cost-benefit analysis, the input/output optimization and  
28  
29 controlling of the scale of operations in the trial reform of public hospitals, improving  
30  
31 the essential drug system, and cultivating and training grass-rooted medical workers,  
32  
33 especially general practitioners in primary health care of China.  
34  
35  
36  
37  
38  
39  
40  
41  
42  
43  
44  
45  
46  
47

## 48 **Reference**

- 49  
50 [1] i Casanovas GL, Rivera B, Currais L, editors. Health and economic growth:  
51  
52 findings and policy implications. Mit Press; 2005.  
53  
54  
55  
56  
57  
58  
59  
60

- 1  
2  
3  
4 [2] Cutler DM, Lleras-Muney A, Vogl T. Socioeconomic status and health:  
5  
6 dimensions and mechanisms. *National Bureau of Economic Research* 2008 ;Sep  
7  
8 10.  
9  
10  
11 [3] Culyer AJ, Wagstaff A. Equity and equality in health and health care. *Journal*  
12  
13 *of health economics* 1993;12(4):431-57.  
14  
15  
16 [4] Liang D, Zhang D, Huang J, Schweitzer S. Does rapid and sustained economic  
17  
18 growth lead to convergence in health resources: the case of China from 1980 to  
19  
20 2010. *INQUIRY: The Journal of Health Care Organization, Provision, and*  
21  
22 *Financing* 2016;53:0046958016631699.  
23  
24  
25  
26 [5] Liu W, Liu Y, Twum P, Li S. National equity of health resource allocation in  
27  
28 China: data from 2009 to 2013. *International journal for equity in health*  
29  
30 2016;15(1):68.  
31  
32  
33  
34 [6] Wang S, Xu J, Jiang X, Li C, Li H, Song S, Huang E, Meng Q. Trends in health  
35  
36 resource disparities in primary health care institutions in Liaoning Province in  
37  
38 Northeast China. *International journal for equity in health* 2018;17(1):178.  
39  
40  
41  
42 [7] Hung LM, Rane S, Tsai J, Shi L. Advancing primary care to promote equitable  
43  
44 health: implications for China. *International journal for equity in health*  
45  
46 2012 ;11(1):2.  
47  
48  
49  
50 [8] XU Jing , JI Jie , ZHUANG Yue-hong , KANG Xiang-qing , XUE Di.  
51  
52 Analysis on the community health resources and their distribution equity in  
53  
54 Pudong New Area of Shanghai. *Chinese Health Resources* 2017; 20:8-10+23(in  
55  
56 Chinese).  
57  
58  
59  
60

- 1  
2  
3  
4 [9] The State Council of China. The opinions of the CPC Central Committee and the  
5  
6 State Council on widening the medical and health system. 2009.  
7  
8 [http://www.gov.cn/jrzq/2009-04/06/content\\_1278721.htm](http://www.gov.cn/jrzq/2009-04/06/content_1278721.htm). Accessed 1 Jan.  
9  
10 2019.  
11  
12  
13  
14  
15  
16  
17 [10] The State Council of China. The opinions of the State Council on Guidelines on  
18  
19 promoting the construction of graded diagnosis and treatment system. 2015.  
20  
21 [http://www.gov.cn/zhengce/content/2015-09/11/content\\_10158.htm](http://www.gov.cn/zhengce/content/2015-09/11/content_10158.htm). Accessed  
22  
23 2. Jan. 2019.  
24  
25  
26  
27 [11] JI Jie, LU Ye, WU Chun-feng, XU Yi-li. Study on the human resource  
28  
29 allocation of food safety system in district centers for disease control and  
30  
31 prevention in Shanghai. *Chinese Health Resources* 2018;21(05):452-455(in  
32  
33 Chinese).  
34  
35  
36  
37 [12] FAN Xin, ZHANG Dingyue, LI Xu, GUO Yanping, CAI Jun, MA  
38  
39 Ning, XIE Bin. Distribution equality of mental health facilities and psychiatric  
40  
41 beds in Shanghai based on Theil index. *Chinese Mental Health Journal* 2018;  
42  
43 32(10):829-834(in Chinese).  
44  
45  
46  
47 [13] Sun J. Equality in the distribution of health material and human resources in  
48  
49 Guangxi: evidence from Southern China. *BMC research notes* 2017 ;10(1):429.  
50  
51  
52  
53 [14] Sun J, Luo H. Evaluation on equality and efficiency of health resources  
54  
55 allocation and health services utilization in China. *International journal for*  
56  
57 *equity in health* 2017;16(1):127.  
58  
59  
60

- 1  
2  
3  
4 [15] Chen R, Zhao Y, Du J, Wu T, Huang Y, Guo A. Health workforce equity in  
5 urban community health service of China. *PLoS One* 2014 ;9(12):e115988.  
6  
7  
8  
9 [16] Pan J, Shallcross D. Geographic distribution of hospital beds throughout China:  
10 a county-level econometric analysis. *International journal for equity in health*  
11 2016 ;15(1):179.  
12  
13  
14  
15  
16 [17] Zhang Y, Wang Q, Jiang T, Wang J. Equity and efficiency of primary health  
17 care resource allocation in mainland China. *International journal for equity in*  
18 *health* 2018 ;17(1):140.  
19  
20  
21  
22  
23 [18] Song S, Yuan B, Zhang L, Cheng G, Zhu W, Hou Z, He L, Ma X, Meng Q.  
24 Increased Inequalities in Health Resource and Access to Health Care in Rural  
25 China. *International journal of environmental research and public health* 2019  
26 ;16(1):49.  
27  
28  
29  
30  
31  
32  
33  
34 [19] Theil H. Economic and information theory North Holland Publish. Co.,  
35 Amsterdam. 1967.  
36  
37  
38  
39  
40 [20] KUANG Li. Strategy for optimizing the mechanism of healthcare competition:  
41 Establishing the vertical integrated healthcare delivery systems. *Chinese*  
42 *Journal of Health Policy* 2012;5(9):34-9(in Chinese).  
43  
44  
45  
46  
47  
48 [21] Zhao Dan-dan. the realty and preliminary analsis on medical resource and their  
49 vertical integration in Shanghai. *Chinese Health Resources* 2008;11(6):259-  
50 62(in Chinese).  
51  
52  
53  
54  
55  
56  
57  
58  
59  
60



- 1  
2  
3  
4 [22] Iriart C, Merhy EE, Waitzkin H. Managed care in Latin America: the new  
5  
6 common sense in health policy reform. *Social Science & Medicine*  
7  
8 2001;52(8):1243-53.  
9  
10  
11 [23] Barr DA: Introduction to US Health Policy: the organization, financing, and  
12  
13 delivery of health care in America: JHU Press; 2016.  
14  
15  
16 [24] Ren Wenjie. The Path Selection of Medical Resource Optimizing Allocation .  
17  
18 *Chinese Health Resources* 2014; 27(6):23-5(in Chinese).  
19  
20  
21 [25] Krugman P, Wells R. The health care crisis and what to do about it. *The New*  
22  
23 *York Review of Books* 2006;53(5).  
24  
25  
26 [26] Wang YY, Liu WW, Han JJ. Equity of Health Resource Distribution in Primary  
27  
28 Healthcare Institutions in China. *Chinese General Practice* 2017 ;  
29  
30 20(28):3451-56.  
31  
32  
33 [27] Zhang XJ, Zhu K. Equity in the Distribution of Human Resources for Health in  
34  
35 China during 2004-2015. *Chinese General Practice* 2018; 21(1):82-7.  
36  
37  
38 [28] LI Yang, DUAN Guang-feng, XIONG Lin-ping. Analysis on equity of health  
39  
40 resource allocation in Shanghai during 2012-2015. *Chinese Health Resources*  
41  
42 2017; 20(05):390-3(in Chinese).  
43  
44  
45 [29] Ma Y, Zhang L, Boswell M. Inequities in the allocation of medical resources in  
46  
47 China's township health centers. *China Agricultural Economic Review*  
48  
49 2016;8(4):637-46.  
50  
51  
52  
53  
54  
55  
56  
57  
58  
59  
60

- 1  
2  
3  
4 [30] ZHANG R an , SUN Yong-guo , YIN Ai-tian. Equity of medical device  
5  
6 configuration in township health clinics since new medical reform. *Chin J*  
7  
8 *Public Health* 2017; 33(08):1236-8(in Chinese).  
9  
10  
11 [31] Paraje G, Vásquez F. Health equity in an unequal country: the use of medical  
12  
13 services in Chile. *International journal for equity in health* 2012 ;11(1):81.  
14  
15  
16 [32] Glorioso V, Subramanian SV. Equity in access to health care services in Italy.  
17  
18 *Health services research* 2014 ;49(3):950-70.  
19  
20  
21 [33] Smith S, Normand C. Equity in health care: the Irish perspective. *Health*  
22  
23 *Economics, Policy and Law* 2011;6(2):205-17.  
24  
25  
26 [34] Ghosh S. Equity in the utilization of healthcare services in India: evidence from  
27  
28 National Sample Survey. *International journal of health policy and*  
29  
30 *management* 2014;2(1):29.  
31  
32  
33 [35] Shi L, Song K, Rane S, Sun X, Li H, Meng Q. Factors associated with job  
34  
35 satisfaction by Chinese primary care providers. *Primary health care research*  
36  
37 *& development* 2014;15(1):46-57.  
38  
39  
40 [36] LIU Liang, LUO Da, BI Chang-wei, CHEN Xin. Study on the Medical and  
41  
42 Health Resource Allocation of Tianjin Based on Gini Coefficient and and  
43  
44 Agglomeration Degree. *Chinese Health Economics* 2019;48-50(in Chinese).  
45  
46  
47 [37] LU Jie,et.al. a comprehensive analysis on spatial agglomeration effect and  
48  
49 inequality of health resource allocation in Gansu province.*Chinese Journal of*  
50  
51 *Health Statistics* 2019;36(02):222-5(in Chinese).  
52  
53  
54  
55  
56  
57  
58  
59  
60

- 1  
2  
3  
4 [38] Zhang T, Xu Y, Ren J, Sun L, Liu C. Inequality in the distribution of health  
5  
6 resources and health services in China: hospitals versus primary care institutions.  
7  
8 *International journal for equity in health* 2017;16(1):42.  
9  
10  
11 [39] Chakraborty R, Chakraborti C. India, health inequities, and a fair healthcare  
12  
13 provision: A perspective from health capability. *Journal of Human*  
14  
15 *Development and Capabilities* 2015;16(4):567-80.  
16  
17  
18  
19  
20  
21  
22  
23  
24  
25  
26  
27  
28  
29  
30  
31  
32  
33  
34  
35  
36  
37  
38  
39  
40  
41  
42  
43  
44  
45  
46  
47  
48  
49  
50  
51  
52  
53  
54  
55  
56  
57  
58  
59  
60

**Table 1 The Health Resource Allocation Indicators**

| The Prospective |                                           | Indicators                                          |
|-----------------|-------------------------------------------|-----------------------------------------------------|
| Hierarchical    | Hospital                                  | Number of technicians in hospitals                  |
|                 |                                           | Number of doctors in hospitals                      |
|                 | PHC                                       | Total value of equipment above ¥10,000 in hospitals |
|                 |                                           | Number of equipment above ¥10,000 in hospitals      |
|                 |                                           | Number of equipment above ¥1,000,000 in hospitals   |
|                 |                                           | Number of technicians in PHCs                       |
|                 |                                           | Number of doctors in PHCs                           |
|                 |                                           | Total value of equipment above ¥10,000 in PHCs      |
|                 | Number of equipment above ¥10,000 in PHCs |                                                     |
|                 |                                           | Number of equipment valued ¥500,000-690,000 in PHCs |

**Table 2 The Amount and GR of Health Resource Allocation (2010 – 2016) (per 1000)**

| Indicator                                           | 2010   | 2011   | 2012   | 2013   | 2014   | 2015    | 2016    | GR     |
|-----------------------------------------------------|--------|--------|--------|--------|--------|---------|---------|--------|
| Number of technicians in hospitals                  | 4.205  | 4.331  | 4.484  | 4.750  | 4.970  | 5.205   | 5.493   | 30.6%  |
| Number of doctors in hospitals                      | 1.415  | 1.437  | 1.476  | 1.527  | 1.613  | 1.695   | 1.776   | 25.5%  |
| Total value of equipment above ¥10,000 in hospitals | 62.306 | 75.231 | 75.775 | 79.025 | 87.995 | 100.582 | 108.823 | 74.7%  |
| Number of equipment above ¥10,000 in hospitals      | 3.659  | 4.384  | 4.758  | 5.090  | 6.393  | 6.199   | 6.363   | 73.9%  |
| Number of equipment above ¥1,000,000 in hospitals   | 0.087  | 0.108  | 0.122  | 0.133  | 0.154  | 0.176   | 0.193   | 122.7% |
| Number of technicians in PHCs                       | 1.063  | 1.081  | 1.095  | 1.118  | 1.153  | 1.180   | 1.205   | 13.4%  |
| Number of doctors in PHCs                           | 0.402  | 0.414  | 0.421  | 0.421  | 0.439  | 0.440   | 0.448   | 11.6%  |
| Total value of equipment above ¥10,000 in PHCs      | 4.215  | 4.420  | 5.208  | 5.890  | 6.525  | 7.683   | 8.255   | 95.8%  |
| Number of equipment above ¥10,000 in PHCs           | 0.575  | 0.583  | 0.695  | 0.769  | 0.876  | 0.989   | 1.086   | 89.0%  |
| Number of equipment valued ¥500,000-690,000 in PHCs | 0.010  | 0.012  | 0.013  | 0.014  | 0.016  | 0.019   | 0.021   | 112.4% |

GR: Growth Rate

Table 3 Time Trends of the Theil Indexes of Health Resource in Shanghai (2010 - 2016)

| Indicators                                          | 2010   | 2011   | 2012   | 2013   | 2014   | 2015   | 2016   |
|-----------------------------------------------------|--------|--------|--------|--------|--------|--------|--------|
| Number of technicians in hospitals                  | 0.2712 | 0.2593 | 0.2570 | 0.2479 | 0.2489 | 0.2544 | 0.3344 |
| Number of doctors in hospitals                      | 0.3377 | 0.3308 | 0.3307 | 0.3165 | 0.3266 | 0.3371 | 0.3401 |
| Total value of equipment above ¥10,000 in hospitals | 0.6213 | 0.5773 | 0.6317 | 0.5212 | 0.5401 | 0.5397 | 0.5282 |
| Number of equipment above ¥10,000 in hospitals      | 0.5124 | 0.4797 | 0.4561 | 0.3724 | 0.4829 | 0.3636 | 0.4562 |
| Number of equipment above ¥1,000,000 in hospitals   | 0.6613 | 0.6136 | 0.5831 | 0.4993 | 0.5037 | 0.5027 | 0.4699 |
| Number of technicians in PHCs                       | 0.0354 | 0.0303 | 0.0250 | 0.0227 | 0.0190 | 0.0189 | 0.0186 |
| Number of doctors in PHCs                           | 0.0423 | 0.0385 | 0.0325 | 0.0295 | 0.0248 | 0.0197 | 0.0178 |
| Total value of equipment above ¥10,000 in PHCs      | 0.0783 | 0.0799 | 0.0748 | 0.0866 | 0.0729 | 0.0889 | 0.0482 |
| Number of equipment above ¥10,000 in PHCs           | 0.0918 | 0.0924 | 0.0962 | 0.0885 | 0.0826 | 0.0611 | 0.0570 |
| Number of equipment valued ¥500,000-690,000 in PHCs | 0.1028 | 0.1397 | 0.1314 | 0.1359 | 0.0886 | 0.0630 | 0.0490 |

(a)

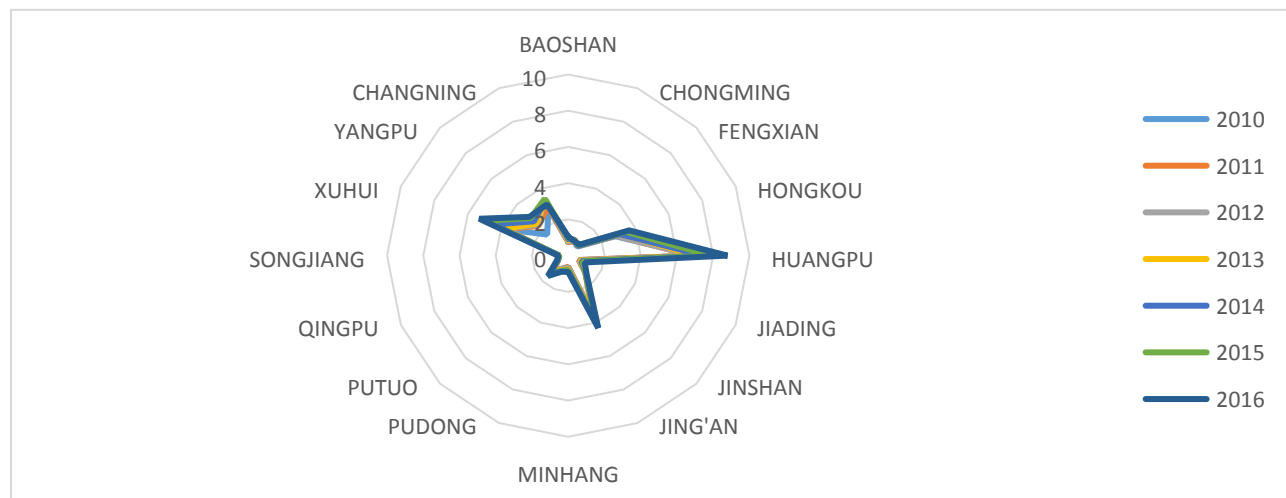

(b)

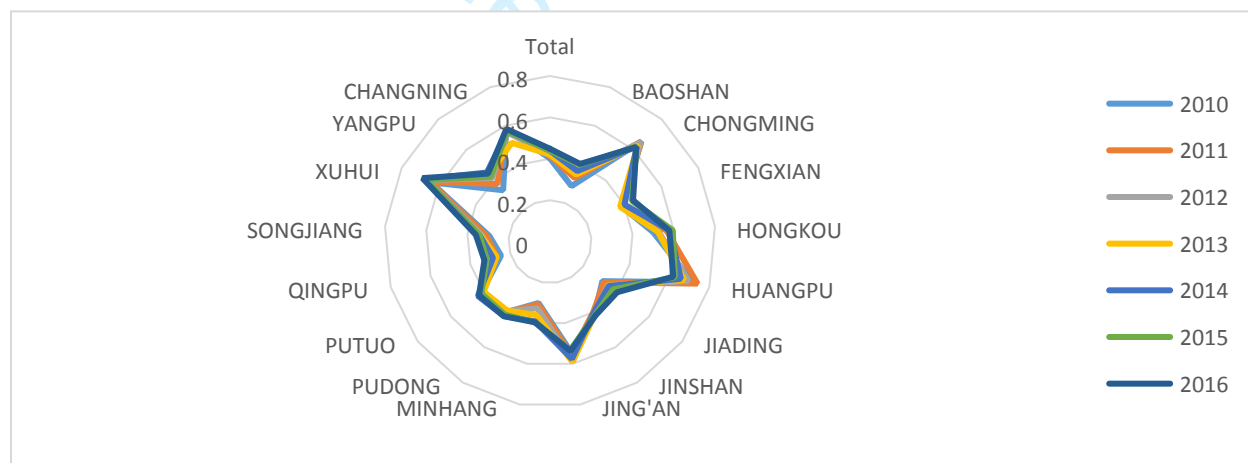

Fig.1 Per 1000 doctors in health institutions across the districts from 2010 to 2016. (a) presents per 1000 doctors in hospitals across the districts from 2010 to 2016;(b) presents per 1000 doctors per 1000 population in PHCs across the districts from 2010 to 2016

(a)

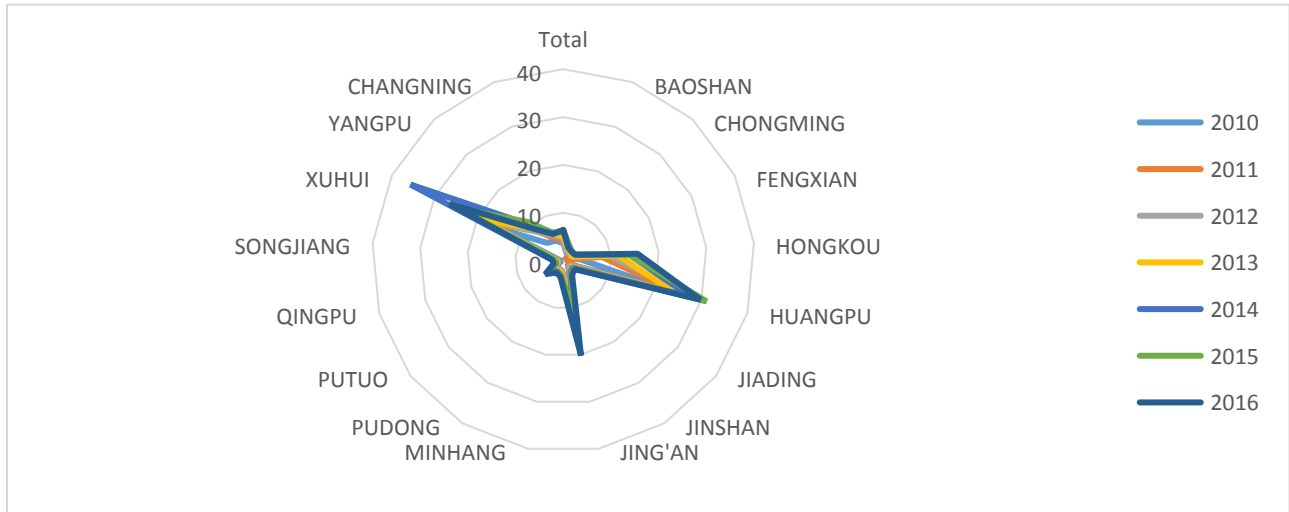

(b)

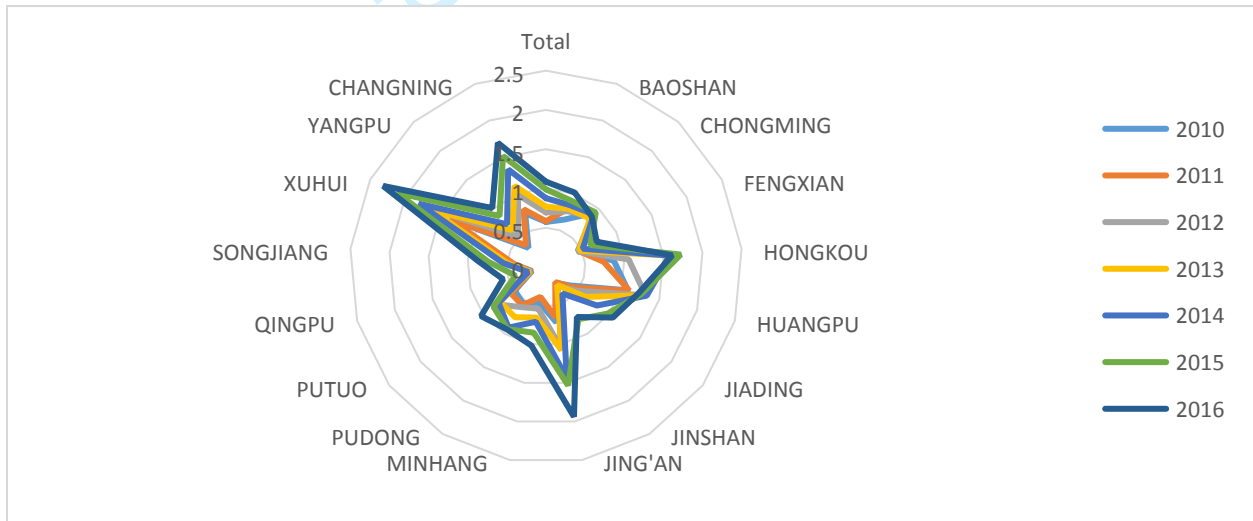

Fig.2 The number of equipment above ¥ 10,000 per 1000 in health institutions from 2010 to 2016 (a) presents the number of equipment above ¥ 10,000 per 1000 in hospitals from 2010 to 2016;(b) presents the number of equipment above ¥ 10,000 per 1000 in PHCs from 2010 to 2016

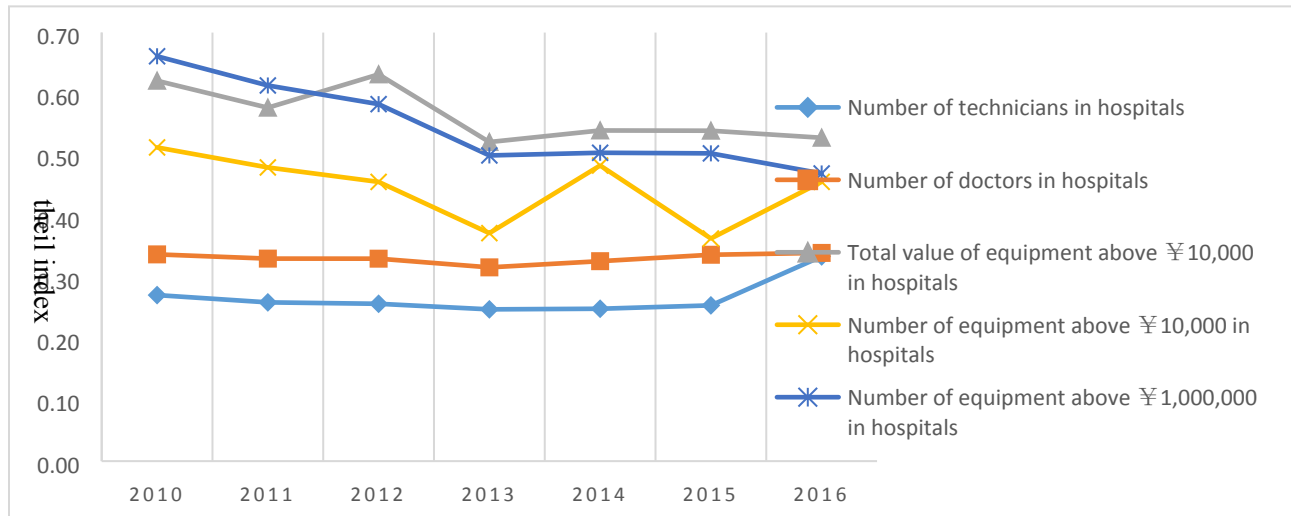

(b)

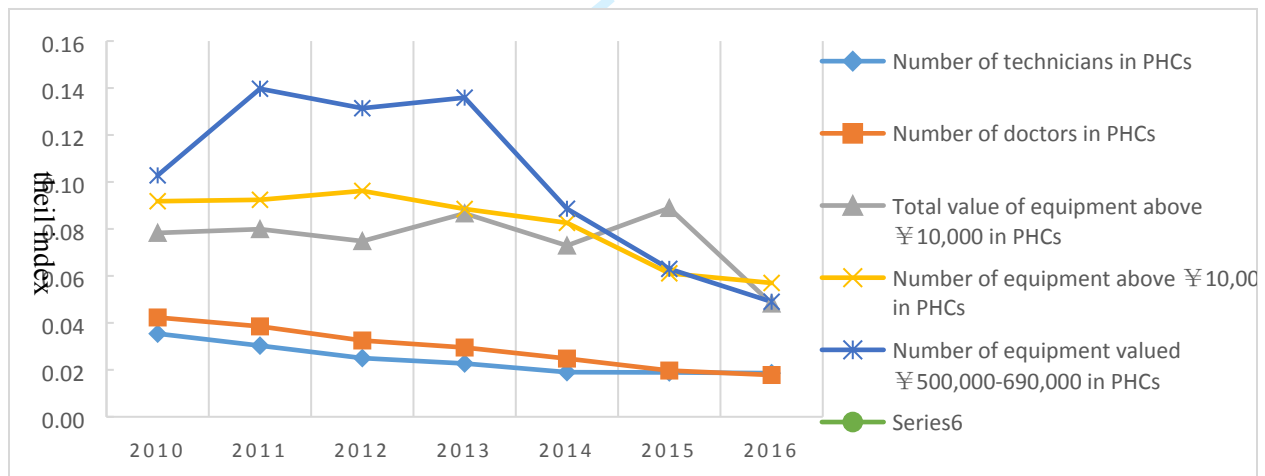

Fig. 3 Trends of the theil indexes for the health resource in health institutions from 2010 to 2016 (a) presents trends of the theil indexes for the health resource in hospitals from 2010 to 2016;(b) presents trends of the theil indexes for the health resource in PHCs from 2010 to 2016



# BMJ Open

## Differences in regional distribution and inequality in health-resource allocation at hospital and primary health center levels: A longitudinal study in Shanghai

|                                 |                                                                                                                                                                                                                                                                                                                                                                                                                                                                                                                                                                                                                                                                                                                                                               |
|---------------------------------|---------------------------------------------------------------------------------------------------------------------------------------------------------------------------------------------------------------------------------------------------------------------------------------------------------------------------------------------------------------------------------------------------------------------------------------------------------------------------------------------------------------------------------------------------------------------------------------------------------------------------------------------------------------------------------------------------------------------------------------------------------------|
| Journal:                        | <i>BMJ Open</i>                                                                                                                                                                                                                                                                                                                                                                                                                                                                                                                                                                                                                                                                                                                                               |
| Manuscript ID                   | bmjopen-2019-035635.R1                                                                                                                                                                                                                                                                                                                                                                                                                                                                                                                                                                                                                                                                                                                                        |
| Article Type:                   | Original research                                                                                                                                                                                                                                                                                                                                                                                                                                                                                                                                                                                                                                                                                                                                             |
| Date Submitted by the Author:   | 12-Mar-2020                                                                                                                                                                                                                                                                                                                                                                                                                                                                                                                                                                                                                                                                                                                                                   |
| Complete List of Authors:       | <p>dong, enhong; Shanghai University of Medicine and Health Sciences, liu, shipeng; Department of Pediatrics of De Zhou's People's Hospital<br/>           chen, minjie; Shanghai Jiao Tong University School of Medicine Affiliated Renji Hospital<br/>           Wang, Hongmei; University of Nebraska Medical Center<br/>           Chen, Li-Wu; University of Nebraska Medical Center, Health Services Research and Administration<br/>           xu, ting; Shanghai University of Medicine and Health Sciences, School of Nursing and Health Management<br/>           wang, tao; Tongji University School of Medicine, Shanghai East Hospital<br/>           zhang, lufa; Shanghai Jiao Tong University, School of International and Public Affairs</p> |
| <b>Primary Subject Heading</b>: | Health economics                                                                                                                                                                                                                                                                                                                                                                                                                                                                                                                                                                                                                                                                                                                                              |
| Secondary Subject Heading:      | Health policy, Health services research                                                                                                                                                                                                                                                                                                                                                                                                                                                                                                                                                                                                                                                                                                                       |
| Keywords:                       | Health economics < HEALTH SERVICES ADMINISTRATION & MANAGEMENT, HEALTH ECONOMICS, Human resource management < HEALTH SERVICES ADMINISTRATION & MANAGEMENT                                                                                                                                                                                                                                                                                                                                                                                                                                                                                                                                                                                                     |
|                                 |                                                                                                                                                                                                                                                                                                                                                                                                                                                                                                                                                                                                                                                                                                                                                               |

SCHOLARONE™  
Manuscripts

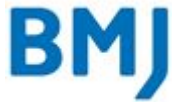

I, the Submitting Author has the right to grant and does grant on behalf of all authors of the Work (as defined in the below author licence), an exclusive licence and/or a non-exclusive licence for contributions from authors who are: i) UK Crown employees; ii) where BMJ has agreed a CC-BY licence shall apply, and/or iii) in accordance with the terms applicable for US Federal Government officers or employees acting as part of their official duties; on a worldwide, perpetual, irrevocable, royalty-free basis to BMJ Publishing Group Ltd ("BMJ") its licensees and where the relevant Journal is co-owned by BMJ to the co-owners of the Journal, to publish the Work in this journal and any other BMJ products and to exploit all rights, as set out in our [licence](#).

The Submitting Author accepts and understands that any supply made under these terms is made by BMJ to the Submitting Author unless you are acting as an employee on behalf of your employer or a postgraduate student of an affiliated institution which is paying any applicable article publishing charge ("APC") for Open Access articles. Where the Submitting Author wishes to make the Work available on an Open Access basis (and intends to pay the relevant APC), the terms of reuse of such Open Access shall be governed by a Creative Commons licence – details of these licences and which [Creative Commons](#) licence will apply to this Work are set out in our licence referred to above.

Other than as permitted in any relevant BMJ Author's Self Archiving Policies, I confirm this Work has not been accepted for publication elsewhere, is not being considered for publication elsewhere and does not duplicate material already published. I confirm all authors consent to publication of this Work and authorise the granting of this licence.

1  
2  
3 **Differences in regional distribution and inequality in health-resource allocation at hospital**  
4 **and primary health center levels: A longitudinal study in Shanghai**  
5  
6

7 Enhong Dong<sup>1</sup>, Shipeng Liu <sup>2</sup>,Minjie Chen<sup>3</sup>, Hongmei Wang<sup>4</sup>,Liwu Chen<sup>4</sup>,Ting Xu,<sup>1</sup> Tao Wang<sup>5,6</sup>,Lufa  
8 Zhang<sup>7\*</sup>  
9

10  
11  
12 <sup>1</sup> School of Nursing and Health Management, Shanghai University of medicine & Health Science, 279  
13 Zhouzhu Road, Pudong new District, Shanghai 201318, Shanghai, China. <sup>2</sup> Department of Pediatrics ,De  
14 Zhou's People's Hospital, Shandong 253000, Shandong province, China; <sup>3</sup> Department of Outpatient and  
15 Emergency, Renji Hospital Affiliated to Shanghai Jiao Tong University School of Medicine, NO.160 Pujian  
16 Road, Pudong new District, Shanghai,200127,China; <sup>4</sup> Department of Health Services Research &  
17 Administration, College of Public Health, 984350 University Nebraska Medical Center, Omaha, NE 68198-  
18 4350;<sup>5</sup> Department of Emergency, Shanghai East Hospital, Tongji University School of Medicine, Shanghai  
19 200120,China.<sup>6</sup> College of Arts and Media, Tongji University, Shanghai 200092 , China.<sup>7</sup> School of  
20 International and Public Affairs, Shanghai Jiao Tong University.1954 Huashan Road, Xuhui District,  
21 Shanghai 200030, Shanghai, China.  
22  
23  
24  
25  
26  
27  
28  
29  
30  
31  
32  
33

34  
35 \*Corresponding author: E-mail: Lufa Zhang zhanglf@sjtu.edu.cn  
36  
37  
38  
39  
40  
41  
42  
43  
44  
45  
46  
47  
48  
49  
50  
51  
52  
53  
54  
55  
56  
57  
58  
59  
60

## Abstract

**Objectives:** To analyze differences in regional distribution and inequality in health-resource allocation at the hospital and primary health center (PHC) levels in Shanghai over 7 years.

**Design:** A longitudinal survey using 2010–2016 data, which were collected for analysis.

**Setting:** The study was conducted at the hospital and PHC levels in Shanghai, China.

**Outcome measures:** Ten health-resource indicators were used to measure health-resource distribution at the hospital and PHC levels. In addition, the Theil index was calculated to measure inequality in health-resource allocation.

**Results:** All quantities of health-care resources per 1000 people in hospitals and PHCs increased across Shanghai districts from 2010 to 2016. Relative to suburban districts, the central districts had higher ratios, both in terms of doctors and equipment, and had faster growth in the doctor indicator and slower growth in the equipment indicator in hospitals and PHCs. The Theil indices of all health-resource allocation in hospitals had higher values compared with those in PHCs every year from 2010 to 2016; furthermore, the Theil indices of the indicators, except for technicians and doctors in hospitals, all exhibited downward time trends in hospitals and PHCs.

**Conclusions:** Increased health-care resources and reduced inequality of health-resource allocation in Shanghai during the 7 years indicated that measures taken by the Shanghai government to deepen the new round of healthcare reform in China since 2009 had been successful. Meanwhile there still existed regional difference between urban and rural areas and inequality across different medical institutions. To solve these problems, we prescribe increased wages, improved working conditions, and more open access to career development for doctors and nurses; reduced investments in redundant equipment in hospitals; and other incentives for balancing the health workforce between hospitals and PHCs.

**Keywords:** Health-care resources, regional difference, inequality, hospital, primary health center (PHC)

### Strengths and limitations of this study

►► Few studies have focused on the association between health-resource allocation and healthcare reform, making the findings of the present study generalizable and applicable to countrywide policies and interventions.

►► A future study will be conducted on health-resource distribution and inequality in health-

resource allocation in Shanghai from 2017 until the present, and its findings will be compared with those of the present study, to provide robust policy prescriptions for China and other developing countries.

►► This study did not analyze factors that may have affected the results, such as the mutual effect between the population's health status and health-resource allocation.

►► Because this study chose indicators of the quality of health-care resources rather than of health service, unaccounted-for factors represented by these indicators could have influenced the observed differences. Thus, the study's conclusion should be generalized with caution.

## 1. Introduction

Reasonable health-resource allocation is essential to achieving health service equity, which contributes to public health and mitigates social conflict<sup>1-3</sup>. In many countries, healthcare reform aims to provide universal and equitable access to health care, which is recognized as a fundamental human right. The distribution of health-care resources is a critical component of health-care access. Furthermore, equity is a basic principle of health-resource allocation, and it is foundational to achieving fairness in the provision of health services. Many studies have demonstrated that wide access to health care can play a crucial role in promoting regional health equity<sup>4-6</sup>. The equitable allocation of health-care resources helps deliver health-care resources to those most in need and ensures accessibility to basic health services as well as fairness for vulnerable populations<sup>7</sup>. Moreover, inequality in health-care resources has adverse consequences, such as the uneven distribution of health-care allocation, which in turn leads to growing inequalities between the rich and poor with respect to health and the economic burden of disease<sup>8</sup>. In 2009, China launched a new round of healthcare reforms with the aim of providing households with secure, efficient, convenient, equitable, and affordable health-care services by reversing the early 1980s move to a market-oriented health system. The reform strengthened the government's role in healthcare, its commitment to equity, and its willingness to experiment with regulated market approaches. The Chinese healthcare system is composed of a health financing system, a health service delivery system, and a health supervision system. Although relatively independent, these subsystems are interrelated, and different actors have their function in them. The health service delivery system consists of the public health system and medical service delivery system; the medical service delivery system includes hospitals at the provincial, city, and county levels, as well as primary

1  
2  
3 health centers (PHCs). The Chinese Ministry of Health divides medical institutions into three  
4 levels by their tasks and functions to form a hierarchical medical system. In this hierarchy, PHCs  
5 (the first level), secondary hospitals (the second level), and tertiary hospitals (the third level)  
6 provide primary, secondary, and tertiary care, respectively<sup>9</sup>. In this hierarchical medical system in  
7 China, patients are channeled toward the appropriate-level institution for treatment and are  
8 encouraged to first visit PHCs when they need to see a doctor. Patients are then referred up the  
9 hierarchy where necessary, and doctors have the right to decide such referrals. This hierarchical  
10 medical system was designed to enable the government to allocate health-care resources efficiently  
11 among patients in China.  
12

13  
14 Accordingly, since 2009, the Shanghai government has implemented corresponding measures to  
15 allocate health-care resources between hospitals and PHCs, conforming tightly to national health  
16 reform strategies and guidelines. As a result of these measures, the quantity of medical equipment  
17 and numbers of doctors and nurses have increased, and the distribution of health-care resources  
18 has become more balanced<sup>10–12</sup>. However, many studies have noted widening urban–rural  
19 disparities in health-care resources across Chinese medical institutions of various types<sup>13–18</sup>,  
20 including in Shanghai<sup>12</sup>. Studies have examined variations in the quantity of and inequality in  
21 health-resource allocation in China; however, they have overlooked differences over time in  
22 health-resource allocation at two institutional levels as well as their association with China’s 2009  
23 healthcare reform. Considering the overall goal of China’s new health-care guidelines and plans  
24 to promote more equitable and efficient health-care resource distribution, it is essential to study  
25 the differences in health-resource distribution and inequity of allocation in Shanghai over time  
26 since the 2009 reforms.  
27

28  
29 Therefore, the purpose of this study was first, to investigate regional difference in health-resource  
30 distribution and the inequity in their allocation at the hospital and PHC level over 7 years (2010–  
31 2016) in Shanghai and second, their association with the new round of health reform in China since  
32 2009.  
33

## 34 **2. Methods**

### 35 **2.1 Patient and public involvement**

36 This study used secondary data from Yearbooks (2010–2016) in Shanghai of China and did not  
37 require patient or public involvement.  
38  
39

## 2.2 Data source

This study used data from the Shanghai Medical Statistical Yearbook from 2010–2016 and the Shanghai Statistical Yearbook from 2010–2016, which are published by the Shanghai Health Commission and Shanghai Statistics Bureau, respectively. Because China has pushed hospitals and PHCs to establish a hierarchical medical system to improve health service quality, we measured health-resource allocation to evaluate the effect of these policies on hospitals and PHCs. The indicators used included the number of health technicians in hospitals or PHCs, the number of doctors in hospitals or PHCs, the total value of medical equipment above RMB 10,000 (US\$ 1424) in hospitals or PHCs, the number of medical equipment items valued above RMB 10,000 (US\$ 1424) in hospitals or PHCs, and the number of medical equipment items valued above RMB 1,000,000 (US\$ 142,410) in hospitals and between RMB 500,000 and 690,000 (US\$ 71,205 and 98,263) in PHCs. These data were taken from the 2010 to 2016 editions of the Shanghai Medical Statistical Yearbook. Table 1 presents all 10 indicators and their definitions along with how they were measured. Per capita measures of all the indicators were calculated after obtaining the annual population of the whole city and every administrative district from the 2010–2016 editions of the Shanghai Statistical Yearbook

**Table 1 Indicators of health-resource allocation, their definitions, and how they were measured**

| Indicators                                                          | Definition                                                                                                                                                                                                                                                                                                                                                                                                                                                                     | How they were measured                                                                        |
|---------------------------------------------------------------------|--------------------------------------------------------------------------------------------------------------------------------------------------------------------------------------------------------------------------------------------------------------------------------------------------------------------------------------------------------------------------------------------------------------------------------------------------------------------------------|-----------------------------------------------------------------------------------------------|
| Number of technicians in hospitals                                  | Workforce in hospitals who assist medical staff complete tasks around their assigned unit or clinic and accommodate patient needs, including pharmacists and radiologists; registered nurses were excluded.                                                                                                                                                                                                                                                                    | Number of technicians in hospitals divided by the population                                  |
| Number of doctors in hospitals                                      | Physicians in hospitals who hold a practicing physician certificate, including practicing physicians and assistants in China. Those who are engaged in the management of health workers as part of the health workforce, such as presidents, vice presidents, and party secretaries were excluded.                                                                                                                                                                             | Number of doctors in hospitals divided by the population                                      |
| Total value of equipment above RMB 10,000 (US\$ 1,424) in hospitals | Total monetary value equal to or more than RMB 10,000 of durable equipment in hospitals that is intended to withstand repeated use by professional and patients. This includes diagnostic equipment, including medical imaging machines, such as ultrasound and MRI machines, PET and CT scanners, and X-ray machines; treatment equipment, including infusion pumps, medical lasers, and LASIK surgical machines; and other medical equipment in Chinese health institutions. | Total value of equipment above RMB 10,000 (US\$ 1,424) in hospitals divided by the population |
| Number of equipment items valued above RMB 10,000                   | This refers to the number of durable equipment items (as defined above) valued at or more than RMB 10,000 in hospitals.                                                                                                                                                                                                                                                                                                                                                        | Number of equipment items valued above RMB 10,000 (US\$ 1,424) in                             |



|                                                                                      |                                                                                                                                                         |                                                                                                                |
|--------------------------------------------------------------------------------------|---------------------------------------------------------------------------------------------------------------------------------------------------------|----------------------------------------------------------------------------------------------------------------|
| (US\$ 1,424) in hospitals                                                            |                                                                                                                                                         | hospitals divided by the population                                                                            |
| Number of equipment items valued above RMB 1,000,000 (US\$ 142,410) in hospitals     | This refers to the number of durable equipment items (as defined above) valued at or more than RMB 1,000,000 in hospitals.                              | Number of equipment items valued above RMB 1,000,000 (US\$ 142,410) in hospitals divided by the population     |
| Number of technicians in PHCs                                                        | This refers to the workforce in PHCs (the same as defined above for hospitals).                                                                         | Number of technicians in PHCs divided by the population                                                        |
| Number of doctors in PHCs                                                            | This refers to the actual physicians in PHCs (the same as defined above for hospitals).                                                                 | Number of doctors in PHCs divided by the population                                                            |
| Total value of equipment above RMB 10,000 (US\$ 1,424) in PHCs                       | This refers to the total monetary value at or more than RMB 10,000 of durable equipment in PHCs (equipment is the same as defined above for hospitals). | Total value of equipment above RMB 10,000 (US\$ 1,424) in PHCs divided by the population                       |
| Number of equipment items valued above RMB 10,000 (US\$ 1,424) in PHCs               | This refers to the number of durable equipment items (as defined above) valued at or more than RMB 10,000 in PHCs.                                      | Number of equipment items valued above RMB 10,000 (US\$ 1,424) in PHCs divided by the population               |
| Number of equipment items valued at RMB 500,000–690,000 (US\$ 71,205–98,263) in PHCs | This refers to the number of durable equipment items (as defined above) valued between RMB 500,000 and 690,000 in PHCs.                                 | Number of equipment items valued at RMB 500,000–690,000 (US\$ 71,205–98,263) in PHCs divided by the population |

Shanghai is one of four directly controlled municipalities of the People's Republic of China, and it is further divided into 16 districts, among which are seven urban and nine suburban districts. Shanghai's urban administrative divisions are as follows: Huangpu, Xuhui, Changning, Jing'an, Putuo, Hongkou, and Yangpu. Its rural administrative divisions are Minhang, Baoshan, Jiading, Pudong New Area, Jinshan, Songjiang, Qingpu, Fengxian, and Chongming. Over 7 years from 2010 to 2016, Shanghai had three administration division mergers aimed at facilitating the long-term development of all the districts involved; enhance the administrative efficiency of urban function and resource distribution for the city; as well as reduce administrative costs. Specifically, in 2011, Luwan District was merged with a neighboring district to form the new Huangpu District; Zhabei was merged with Jing'an District in 2015; and Chongming County was upgraded to



Chongming District in 2016. To maintain data comparability, we formatted the new data of the 16 administration divisions by integrating the data of the two merged districts of Luwan and Zhabei into those of Huangpu and Jing'an, respectively.

## 2.3 Data analysis

Many measures exist for evaluating the equity of health-resource allocation, such as the Lorenz curve, Gini coefficient, and Theil index. The Theil index is a statistic primarily used to measure income inequality or other economic phenomena among different individuals or within varied groups. It is a special case of the generalized entropy index and one of the most widely used measures of inequality in regional economic development. The Theil index was proposed by econometrician Henri Theil at Erasmus University Rotterdam<sup>19</sup>, and it can be formulated as follows:

$$T = \frac{1}{n} \sum_{i=1}^n \frac{y_i}{\bar{y}} \log\left(\frac{y_i}{\bar{y}}\right), \quad (1)$$

where  $T$  is the Theil index, which represents income allocation inequality, and  $y_i$  and  $\bar{y}$  is the income of individual  $i$  and the average income of the population, respectively.

The Theil index has another form to measure the inequality between different groups, which is known as the between-region difference. This formula can be written as follows:

$$T = \sum_{i=1}^k w_i \ln\left(\frac{w_i}{e_i}\right), \quad (2)$$

where  $w_i$  represents the proportion of the income of group  $i$  accounting for the total income of all groups and  $e_i$  represents the proportion of the people in group  $i$  accounting for the overall population of all groups. In this study, we defined  $w_i$  as the proportion of health-care resources in district  $i$  accounting for the resources of the whole city, and we defined  $e_i$  as the proportion of the people in district  $i$  accounting for the overall population of the city.

## 3. Results

### 3.1 Differences in regional distribution of health-resource allocation at the hospital and PHC levels in Shanghai from 2010 to 2016

Table 2 presents descriptive statistics of indicators of health-resource allocation in Shanghai's hospitals and PHCs. Table 3 presents changes in numbers and growth rates related to health-resource allocation in Shanghai's hospitals and PHCs. Further details of changes for each indicator with whiskers box plot per every year from 2010 to 2016 are presented in appendix (see the additional file). As indicated by the table, the health-care resources in hospitals and PHCs increased gradually from 2010 to 2016, the quantities of health-care resources per 1000 of the population all increased, and the number of equipment items grew faster than did the health workforce in hospitals and PHCs overall. For example, from 2010 to 2016, the number of equipment items valued above RMB 10,000 (US\$ 1424) per 1000 people and above RMB 1,000,000 (US\$ 142,410) per 1000 people in hospitals increased by 73.9% and 122.7%, respectively; furthermore, the numbers of technicians and doctors per 1000 people in hospitals increased by 30.6% and 25.5%, respectively, more than twice the corresponding numbers of technicians and doctors in PHCs during the same period.

As for administrative divisions, from 2010 to 2016, an increasing trend was observed in the numbers of doctors and equipment items per 1000 people both in hospitals and PHCs across all districts except for Chongming District. Chongming had an unexpected decrease from 0.94 in 2010 to 0.87 in 2016 for the number of equipment items valued above RMB 10,000 (US\$ 1424) per 1000 people in PHCs.

In common for every district was a similar trend of the number of equipment per 1000 of the population growing faster than that of doctors, in both hospital and PHCs from 2010 to 2016. Noticeably, whether in hospitals or PHCs, central districts had higher ratios than did

Table 2 Descriptive Statistics of indicators of health-resource allocation in Shanghai's hospitals and PHCs (2010–2016; per 1000)

| Indicators                                                                       | Obs. | Min. | Max.   | Mean.  | Median |
|----------------------------------------------------------------------------------|------|------|--------|--------|--------|
| Number of technicians in hospitals                                               | 112  | 1.42 | 26.14  | 6.04   | 3.34   |
| Number of doctors in hospitals                                                   | 112  | 0.49 | 8.79   | 2.07   | 1.10   |
| Total value of equipment above RMB 10,000 (US\$ 1,424) in hospitals              | 112  | 4.51 | 516.87 | 114.33 | 46.49  |
| Number of equipment items valued above RMB 10,000 (US\$ 1,424) in hospitals      | 112  | 0.36 | 35.65  | 6.77   | 2.95   |
| Number of equipment items valued above RMB 1,000,000 (US\$ 142,410) in hospitals | 112  | 0.05 | 8.24   | 1.87   | 0.81   |
| Number of technicians in PHCs                                                    | 112  | 0.76 | 2.06   | 1.23   | 1.17   |
| Number of doctors in PHCs                                                        | 112  | 0.25 | 0.74   | 0.46   | 0.42   |

|                                                                                         |     |      |       |      |      |
|-----------------------------------------------------------------------------------------|-----|------|-------|------|------|
| Total value of equipment above RMB 10,000 (US\$ 1,424) in PHCs                          | 112 | 1.65 | 20.61 | 6.33 | 5.35 |
| Number of equipment items valued above RMB 10,000 (US\$ 1,424) in PHCs                  | 112 | 0.19 | 2.32  | 0.86 | 0.79 |
| Number of equipment items valued above RMB 500,000–690,000 (US\$ 71,205–98,263) in PHCs | 112 | 0.00 | 0.21  | 0.04 | 0.03 |

Table 3 Changes in the numbers and growth rates related to health-resource allocation in Shanghai's hospitals and PHCs (2010–2016; per 1000)

| Indicator                                                                               | 2010  | 2011  | 2012  | 2013  | 2014  | 2015   | 2016   | GR     |
|-----------------------------------------------------------------------------------------|-------|-------|-------|-------|-------|--------|--------|--------|
| Number of technicians in hospitals                                                      | 4.21  | 4.33  | 4.48  | 4.75  | 4.97  | 5.21   | 5.49   | 30.6%  |
| Number of doctors in hospitals                                                          | 1.42  | 1.44  | 1.48  | 1.53  | 1.61  | 1.70   | 1.78   | 25.5%  |
| Total value of equipment above RMB 10,000 (US\$ 1,424) in hospitals                     | 62.31 | 75.23 | 75.78 | 79.03 | 88.00 | 100.58 | 108.82 | 74.7%  |
| Number of equipment items valued above RMB 10,000 (US\$ 1,424) in hospitals             | 3.66  | 4.38  | 4.76  | 5.09  | 6.39  | 6.20   | 6.36   | 73.9%  |
| Number of equipment items valued above RMB 1,000,000 (US\$ 142,410) in hospitals        | 0.09  | 0.11  | 0.12  | 0.13  | 0.15  | 0.18   | 0.19   | 122.7% |
| Number of technicians in PHCs                                                           | 1.06  | 1.08  | 1.10  | 1.12  | 1.15  | 1.18   | 1.21   | 13.4%  |
| Number of doctors in PHCs                                                               | 0.40  | 0.41  | 0.42  | 0.42  | 0.44  | 0.44   | 0.45   | 11.6%  |
| Total value of equipment above RMB 10,000 (US\$ 1,424) in PHCs                          | 4.22  | 4.42  | 5.21  | 5.89  | 6.53  | 7.68   | 8.26   | 95.8%  |
| Number of equipment items valued above RMB 10,000 (US\$ 1,424) in PHCs                  | 0.58  | 0.58  | 0.70  | 0.77  | 0.88  | 0.99   | 1.09   | 89.0%  |
| Number of equipment items valued above RMB 500,000–690,000 (US\$ 71,205–98,263) in PHCs | 0.01  | 0.01  | 0.01  | 0.01  | 0.02  | 0.02   | 0.02   | 112.4% |

GR = growth rate.

suburban districts both in the number of doctors and equipment per 1000 of the population. This indicated an unchanged distribution concentration in health-care resource allocation among central areas other than rural ones in Shanghai. Figures 1 (a) and (b) illustrate the numbers of doctors in hospitals and PHCs, respectively, per 1000 of the population across Shanghai's districts from 2010 to 2016. As for the number of doctors per 1000 people in hospitals, central districts grew faster than suburban ones did over this period; for example, in hospitals, Xuhui exhibited an increase of 39.47%, Hongkou of 28.57%, and Huangpu of 28.57%, whereas Songjiang and Qingpu only

exhibited increases of under 1% in the same period. Even Fengxian, the fastest growing division for ratios of doctors across all rural districts, only exhibited an increase of 14.29%, lower than the 15% average growth rate for hospitals in central districts over the 7 years. By contrast, no PHCs in either central or suburban districts exhibited a marked increase in the number of doctors per 1000 of the population.

Figure 2 (a) and (b) illustrate the number of equipment items valued above RMB 10,000 per 1000 people in hospitals and PHCs, respectively, from 2010 to 2016. A different trend was observed between central and suburban districts in that central districts grew slower in terms of hospitals and PHCs in the same period. For example, from 2010 to 2016, in terms of equipment ratios in hospitals, Huangpu, Xuhui, Jing'an, and Hongkou Districts all exhibited increases in growth rates of 22.75, 76.16, 157.40, and 354.23%, respectively, while Songjiang, Qingpu, and Fengxian Districts all experienced rapid development of more than five-fold in per capita equipment. Similarly, in terms of equipment ratios in PHCs, Changning, Putuo, Jing'an, and Hongkou increased by 100%, while Qingpu and Jinshan increased by more than 200%.

### 3.2 Inequality in health-resource allocation at the hospital and PHC levels in Shanghai from 2010 to 2016

Table 4 and Fig. 3 present the Theil indices of health-resource allocation in Shanghai's hospitals and PHCs from 2010 to 2016. In the same year at different levels of medical institutions, the Theil indices in hospitals were higher than those in PHCs for overall health-care resources, especially for equipment. This indicated greater unfairness of health-care resource allocation in hospitals than in PHCs in Shanghai during this period. For example, in 2016, the Theil indices of the numbers of technicians and doctors in hospitals were 0.33 and 0.34, respectively, whereas the corresponding indices in PHCs were both 0.02. The Theil indices of the total value of equipment above RMB 10,000 (US\$ 1424) and the number of equipment items valued above RMB 10,000 (US\$ 1424) in hospitals were 0.53 and 0.46, respectively, whereas the corresponding indices in PHCs were 0.05 and 0.06, respectively.

Table 4 Theil indices related to health-resource allocation in hospitals and PHCs in Shanghai (2010–2016)

| Indicators                         | 2010 | 2011 | 2012 | 2013 | 2014 | 2015 | 2016 |
|------------------------------------|------|------|------|------|------|------|------|
| Number of technicians in hospitals | 0.27 | 0.26 | 0.26 | 0.25 | 0.25 | 0.25 | 0.33 |

| Indicators                                                                        | 2010 | 2011 | 2012 | 2013 | 2014 | 2015 | 2016 |
|-----------------------------------------------------------------------------------|------|------|------|------|------|------|------|
| Number of doctors in hospitals                                                    | 0.34 | 0.33 | 0.33 | 0.32 | 0.33 | 0.34 | 0.34 |
| Total value of equipment above RMB 10,000 (US\$ 1,424) in hospitals               | 0.62 | 0.58 | 0.63 | 0.52 | 0.54 | 0.54 | 0.53 |
| Number of equipment items valued above RMB 10,000 (US\$ 1,424) in hospitals       | 0.51 | 0.48 | 0.46 | 0.37 | 0.48 | 0.36 | 0.46 |
| Number of equipment items valued above RMB 1,000,000 (US\$ 142,410) in hospitals  | 0.66 | 0.61 | 0.58 | 0.50 | 0.50 | 0.50 | 0.47 |
| Number of technicians in PHCs                                                     | 0.04 | 0.03 | 0.03 | 0.02 | 0.02 | 0.02 | 0.02 |
| Number of doctors in PHCs                                                         | 0.04 | 0.04 | 0.03 | 0.03 | 0.02 | 0.02 | 0.02 |
| Total value of equipment above RMB 10,000 (US\$ 1,424) in PHCs                    | 0.08 | 0.08 | 0.07 | 0.09 | 0.07 | 0.09 | 0.05 |
| Number of equipment items valued above RMB 10,000 (US\$ 1,424) in PHCs            | 0.09 | 0.09 | 0.10 | 0.09 | 0.08 | 0.06 | 0.06 |
| Number of equipment items valued RMB 500,000–690,000 (US\$ 71,205–98,263) in PHCs | 0.10 | 0.14 | 0.13 | 0.14 | 0.09 | 0.06 | 0.05 |

As for Theil index trends for health-care resources in Shanghai from 2010 to 2016, the indices of all indicators exhibited a decline for both hospitals and PHCs, except for the numbers of technicians and doctors in hospitals. This indicated a reduction in the inequality in health institutions with respect to most health-care resource indicators in Shanghai over the 7 years. From 2010 to 2016, the Theil indices of all the equipment indicators in hospitals, the total value of equipment above RMB 10,000 (US\$ 1424), the number of equipment items valued above RMB 10,000 (US\$ 1424), and the number of equipment items valued above RMB 1,000,000 (US\$ 142,410) all exhibited declines (despite a slight increase from 2013 to 2014). This indicated a reduction in the inequality of hardware construction in hospitals in that period.

Similarly, regarding the Theil indices of the health-care workforce in PHCs, those for the numbers of technicians and doctors both exhibited consistent downward trends during the period. Furthermore, after experiencing some fluctuations during this period, the indices for the total value of equipment above RMB 10,000 (US\$ 1424), number of equipment items valued above RMB

1  
2  
3 10,000 (US\$ 1424), and number of equipment items valued RMB 500,000–690,000 (\$71,205–  
4 98263) in PHCs exhibited continual decreases. However, for the Theil indices of the health-care  
5 workforce in hospitals, reverse trends were observed in both the numbers of technicians and  
6 doctors during this period; for example, the index of technicians in hospitals decreased from 0.27  
7 in 2010 to 0.25 in 2013, followed by an increase to 0.33 in 2016; similarly, the index of doctors in  
8 hospitals exhibited the same trend, which demonstrated that the problem of inequality in health-  
9 care workforce allocation in hospitals had not been solved.

#### 16 17 **4. Discussion**

18  
19 This study analyzed the temporal trends and inequality of health-resource allocation at the hospital  
20 and PHC levels in Shanghai, noting trends of improvements in the quantity and inequality in  
21 health-resource allocation from 2010 to 2016. However, various regions have an unbalanced  
22 distribution of health-care resources, especially equipment and health workforce in hospitals,  
23 which exhibited serious inequalities in either number or temporal trend.

24  
25 First, this study observed that the number of technicians, number of doctors, total value of  
26 equipment above RMB 10,000 (US\$ 1424), number of equipment items valued above RMB  
27 10,000 (US\$ 1424) in hospitals and PHCs, number of equipment items valued above RMB  
28 1,000,000 (US\$ 142,410) in hospitals, and number of equipment items valued RMB 500,000–  
29 690,000 (US\$ 71,205–98,263) in PHCs all increased over the 7 years. These results indicated that  
30 the Chinese government’s goals of reforming the healthcare system to operate smoothly and  
31 provide a safe, efficient, and convenient health service over past 7 years have been achieved. To  
32 expand and optimize health-care resources on the supply side, according to the “Healthy China  
33 2030” planning outline and other health policy plans, China has integrated health subsystems by  
34 investing financially in health institutions to purchase various types of equipment; recruit and train  
35 technicians and doctors; make health institutions function reoriented; update the health-care  
36 service model based on the state of public health; and present a collaborative hierarchical medical  
37 system that meets people’s health-care demands<sup>20–23</sup>. This included not only perfecting plans for  
38 the geographical distribution of health-care resources across different regions and districts<sup>24</sup> but  
39 also maintaining a dynamic balance in allocation between hospitals and PHCs. On the demand-  
40 side, the government has educated Chinese people about the “big health” concept to foster healthy  
41 lifestyles, as well as re-designed medical insurance to widen coverage among poorer people<sup>25</sup>,

1  
2  
3 providing an increasing number of patients with reasonable access to health-care resources. Thus,  
4 the aforementioned measures of the Chinese and Shanghai governments have resulted in increased  
5 numbers of technicians, doctors, and equipment items across different institutions and varied  
6 districts, and also reduced the inequality in health-resource allocation from 2010 to 2016.  
7 Numerous studies have supported these results <sup>17,26–27</sup>.

8  
9  
10  
11  
12 Second, this study observed regional differences in health-resource distribution at the hospital  
13 and PHC levels from 2010 to 2016. Health programs were unbalanced in their development when  
14 hospitals and PHCs were compared, which resulted in an aberrant phenomenon named an  
15 “inverted triangle,” as opposed to an “equilateral triangle,” meaning that increasing numbers of  
16 technicians and doctors in PHCs have been attracted to tertiary and specialty public hospitals. This  
17 has caused losses in medical human resources in the PHCs. This has happened because of lower  
18 salaries and limited career advancement causing PHC doctors and nurses to leave to work at larger  
19 hospitals. Some relevant studies have also noted an “inverted triangle” <sup>5,28</sup>. Furthermore, more  
20 larger hospitals were distributed in urban districts than in rural ones, which led to increasing  
21 numbers of the health workforce being attracted from suburban to central districts. Additionally,  
22 suburban districts grew faster than urban ones did in terms of numbers of equipment items in  
23 hospitals and PHCs because—due to fewer health-care resources and the slower development of  
24 health institutions in rural areas—expanding the equipment in health institutions was urgent.  
25 Moreover, this goal was easier to achieve than quickly recruiting and training doctors and nurses  
26 was when the government invested significantly in Shanghai from 2009 onward. This result on the  
27 regional difference is similar to those of studies that discovered rapidly growing numbers of  
28 equipment items in suburban areas in China and an overcentralized health workforce in urban areas  
29–30.  
31  
32  
33  
34  
35  
36  
37  
38  
39  
40  
41  
42

43 Third, this study used the Theil index to analyze inequality in health-resource allocation. The  
44 index has some disadvantages, such as being complex to calculate and interpret; a wide variety  
45 when distribution varies regardless of the change that occurs in the top, middle, or bottom tier of  
46 resources; and the fact that when comparing populations with different sizes, the calculation is  
47 dependent on the number of individuals in the population or group. Nonetheless, this measurement  
48 method can still be robust when determining inequality within and between group components,  
49 with high sensitivity to the efficiency of health-resource allocation. This is because the index is  
50 decomposable by groups, can incorporate group-level data, and is particularly effective at paring  
51  
52  
53  
54  
55  
56  
57  
58  
59  
60



1  
2  
3 effects in hierarchical data sets<sup>31</sup>. This study confirmed the inequality among technicians, doctors,  
4 and equipment in hospitals from 2010 to 2016. On the one hand, hospitals had higher Theil indices  
5 than did PHCs in numbers of all health-care resources, especially equipment in Shanghai in every  
6 year, again demonstrating unbalanced distribution of health-care resources between hospitals and  
7 PHCs. This is attributable to the fact that with the rapid development of hospitals, many hospitals  
8 have profited and have thus continually invested in the recruitment and education of doctors and  
9 have bought large quantities of advanced medical equipment to meet the medical needs of an  
10 increasing number of patients. This has resulted in overinvestment in the health workforce and  
11 equipment, whereas PHCs have not invested enough in these health-care resources and cannot  
12 compete with hospitals because they have fewer patients and are less profitable. This result is  
13 consistent with the findings reported by Zhang T. et al.<sup>32</sup> and Wang YY. et al.<sup>26</sup>. On the other  
14 hand, the Theil indices of the health workforce in hospitals, such as technicians and doctors,  
15 increased during this period, indicating worsening inequality in health-resource allocation. The  
16 reason is that the elevated provision of human resources does not necessarily indicate a decline in  
17 inequity, as has been noted in other countries<sup>33–36</sup>. As mentioned, increasing numbers of  
18 technicians and doctors flow into larger urban hospitals from rural, new, or private hospitals for  
19 reasons of salary and career advancement. Another reason is that hospitals will compete for more  
20 patients and profit because of the Matthew effect in the medical field, indicating that an increasing  
21 number of patients have been seeing doctors in famous tertiary or larger hospitals, and fewer  
22 patients trust doctors in nonfamous or small hospitals, leading to more human resources in health  
23 institutions pouring into larger hospitals, thereby further exacerbating the disparities between  
24 larger and smaller hospitals. This finding is similar to those of some relevant studies, which have  
25 confirmed the health workforce distribution gap among hospitals of various sizes<sup>37–39</sup>.

26  
27  
28  
29  
30  
31  
32  
33  
34  
35  
36  
37  
38  
39  
40  
41  
42  
43 The present study has several limitations. First, the data used potentially only reflect the health-  
44 resource allocation status in Shanghai at the cut-off because we could only obtain them from the  
45 Chinese Yellowbooks, which are often published officially at least 2 years after the year the data  
46 were for; therefore, crucial information could have been omitted from our data. In the future, a  
47 new study on changes in health-resource allocation from 2017 to the present, along with  
48 comparisons with the present study, can be conducted when the data are available. Second, this  
49 study did not consider the effect of the population's health outcomes on health-resource allocation.  
50 According to the health capacity paradigm theory<sup>40</sup>, the population's health status in a region will  
51  
52  
53  
54  
55  
56  
57  
58  
59  
60



1  
2  
3 have mutual effects on health-resource allocation in that area. Due to time and resource constraints,  
4 we did not consider these factors, which may have affected the results. Third, we selected  
5 indicators for health-resource allocation at different institutional levels rather than indicators of  
6 the quality of health services. Factors represented by other unmeasured indicators may have  
7 influenced the results. Thus, integrating the indicators of health-resource allocation used in this  
8 study with those of health service quality may yield more robust results in a future study.  
9

## 13 **5. Conclusion**

14  
15 Health-care resources increased and inequality in resource allocation decreased in Shanghai from  
16 2010 to 2016. This indicates the success of the measures taken by the Chinese government since  
17 its 2009 reforms, specifically with respect to technicians, doctors, and equipment in hospitals and  
18 PHCs. However, the distribution of health-care resources differed between urban and rural areas  
19 and between hospitals and other institutions. To achieve an institutional and regional balance in  
20 health-care resource distribution between central and rural areas, a comprehensive solution to raise  
21 wages and improve working conditions of health workers in PHCs and rural areas is required,  
22 which will prevent their excessive flow to hospitals and urban areas. This will prevent the inverted  
23 triangle from occurring and mitigate the institutional burden for the government. In addition,  
24 motivational efforts are required to cultivate and train more medical students to a high degree and  
25 encourage them to work in rural areas. Policies should not only be focused on the imbalance in the  
26 health workforce distribution between larger urban hospitals and smaller ones—such as policies  
27 for raising salaries for doctors and nurses in small-scale suburban hospitals and implementing job  
28 performance evaluation reform in all hospitals—they should also be focused on reducing  
29 redundant equipment investments and health workforce disparity in hospitals—such as  
30 implementing cost-benefit analyses and input/output optimization as well as controlling the scale  
31 of operations in the trial reform of public hospitals. To more deeply explore health-resource  
32 allocation, future studies must be conducted that integrate the indicators used in the present study  
33 with indicators of health service quality.  
34  
35

## 36 **Contributor statement**

37  
38 ED, HW, LC, TW and LZ designed the study together, acquired the data and developed the  
39 statistical plan. SL, MC and TX carried out the survey. HW and LC performed the statistical  
40 analysis. ED, TW and LZ interpreted the analysis. ED and LZ drafted and revised the manuscript.  
41 All authors read and approved the final manuscript.  
42  
43  
44  
45  
46  
47

### Competing interests None

**Funding** This research was funded National social Science Foundation of China General Project (Grant No. 18BGL242). The funders had no role in the question design, analysis or interpretation.

**Data sharing statement** Data are available upon reasonable request.

### References

1. i Casanovas GL, Rivera B, Currais L, editors. Health and economic growth: findings and policy implications. Mit Press, 2005.
2. Cutler DM, Lleras-Muney A, Vogl T. Socioeconomic status and health: dimensions and mechanisms. National Bureau of Economic Research 2008 ; Sep 10.
3. Culyer AJ, Wagstaff A. Equity and equality in health and health care. Journal of health economics 1993; 12(4): 431-57.
4. Shi Y, Na AN, Qian GU, Ming LI. The equity analysis of resource allocation of community health services in Shanghai. Chin Health Resour 2010; 06(13): 285-6.
5. Sun X, Zhang H, Hu X, et al. Measurement and analysis of equity in health: a case study conducted in Zhejiang Province. China Int J Equity Health 2018; 17(1): 36.
6. Kreng VB, Yang C. The equality of resource allocation in health care under the National Health Insurance System in Taiwan. Health Policy 2011; 100: 203-10.
7. Tao Y, Henry K, Zou Q, et al. Methods for measuring horizontal equity in health resource allocation: a comparative study. Heal Econ Rev 2014; 4: 1-10.
8. Szalai J. Inequalities in access to health care in Hungary. Social Science & Medicine 1986; 22: 135-40.
9. Meng, Q., Yang, H., Chen, W., Sun, Q., & Liu, X. People's Republic of China Health System Review. Health Systems in Transition 2015; 5. Retrieved from [http://www.wpro.who.int/asia\\_pacific\\_observatory/hits/series/china\\_health\\_systems\\_review.pdf%0Ahttp://www.wpro.who.int/asia\\_pacific\\_observatory/en/](http://www.wpro.who.int/asia_pacific_observatory/hits/series/china_health_systems_review.pdf%0Ahttp://www.wpro.who.int/asia_pacific_observatory/en/) (accessed 11 Feb 2020).
10. XU Jing, JI Jie, ZHUANG Yue-hong, et al. Analysis on the community health resources and their distribution equity in Pudong New Area of Shanghai. Chinese Health Resources 2017; 20: 8-10+23 (in Chinese).
11. JI Jie, LU Ye, WU Chun-feng, et al. Study on the human resource allocation of food safety system in district centers for disease control and prevention in Shanghai. Chinese Health Resources 2018; 21: 452-55 (in Chinese).

12. FAN Xin , ZHANG Dingyue , LI Xu , et al. Distribution equality of mental health facilities and psychiatric beds in Shanghai based on Theil index. *Chinese Mental Health Journal* 2018; 32):829-34(in Chinese).
13. Wang S, Xu J, Jiang X, et al. Trends in health resource disparities in primary health care institutions in Liaoning Province in Northeast China. *International journal for equity in health* 2018;17:1-8.
14. Sun J. Equality in the distribution of health material and human resources in Guangxi: evidence from Southern China. *BMC research notes* 2017 ;10:429.
15. Sun J, Luo H. Evaluation on equality and efficiency of health resources allocation and health services utilization in China. *International journal for equity in health* 2017;16:127.
16. Chen R, Zhao Y, Du J, Wu T, Huang Y, Guo A. Health workforce equity in urban community health service of China. *PLoS One* 2014 ;9:e115988.
17. Pan J, Shallcross D. Geographic distribution of hospital beds throughout China: a county-level econometric analysis. *International journal for equity in health* 2016 ;15:179.
18. Zhang Y, Wang Q, Jiang T, Wang J. Equity and efficiency of primary health care resource allocation in mainland China. *International journal for equity in health* 2018;17:140.
19. Theil H. *Economic and information theory* North Holland Publish. Co.,Amsterdam,1967.
20. KUANG Li. Strategy for optimizing the mechanism of healthcare competition: Establishing the vertical integrated healthcare delivery systems. *Chinese Journal of Health Policy* 2012;5:34-9(in Chinese).
21. Zhao Dan-dan. the realty and preliminary analsis on medical resource and their vertical integration in Shanghai. *Chinese Health Resources* 2008;11:259-62(in Chinese).
22. Iriart C, Merhy EE, Waitzkin H. Managed care in Latin America: the newcommon sense in health policy reform. *Social Science & Medicine* 2001;52:1243-53.
23. Barr DA: *Introduction to US Health Policy: the organization, financing, and delivery of health care in America*: JHU Press; 2016.
24. R en Wenjie. The Path Selection of Medical R esource Optimizing Allocation. *Chinese Health Resources* 2014 ; 27:23-5(in Chinese).
25. Krugman P, Wells R. *The health care crisis and what to do about it*. The New York Review of Books 2006;53.
26. Wang YY, Liu WW, Han JJ. Equity of Health Resource Distribution in Primary Healthcare Institutions in China. *Chinese General Practice* 2017 ; 20:3451-56.
27. Zhang XJ, Zhu K. Equity in the Distribution of Human Resources for Health in China during 2004-2015. *Chinese General Practice* 2018; 21:82-7.

- 1  
2  
3 28. LI Yang, DUAN Guang-feng, XIONG Lin-ping. Analysis on equity of health resource allocation in  
4 Shanghai during 2012-2015. *Chinese Health Resources* 2017; 20:390-3(in Chinese).  
5  
6 29. Ma Y, Zhang L, Boswell M. Inequities in the allocation of medical resources in China's township health  
7 centers. *China Agricultural Economic Review* 2016;8:637-46.  
8  
9 30. ZHANG R an , SUN Yong-guo , YIN Ai-tian. Equity of medical device configuration in township  
10 health clinics since new medical reform. *Chin J Public Health* 2017; 33:1236-8(in Chinese).  
11  
12 31. Tao Y, Henry K, Zou Q, Zhong X. Methods for measuring horizontal equity in health resource allocation:  
13 a comparative study. *Health economics review* 2014 Dec;4:10.  
14  
15 32. Zhang T, Xu Y, Ren J, et al. Inequality in the distribution of health resources and health services in  
16 China: hospitals versus primary care institutions. *International journal for equity in health* 2017;16:42.  
17  
18 33. Paraje G, Vásquez F. Health equity in an unequal country: the use of medical services in Chile.  
19 *International journal for equity in health* 2012 ;11:81.  
20  
21 34. Glorioso V, Subramanian SV. Equity in access to health care services in Italy. *Health services research*  
22 2014 ;49:950-70.  
23  
24 35. Smith S, Normand C. Equity in health care: the Irish perspective. *Health Economics, Policy and Law*  
25 2011;6:205-17.  
26  
27 36. Ghosh S. Equity in the utilization of healthcare services in India: evidence from National Sample Survey.  
28 *International journal of health policy and management* 2014;2:29  
29  
30 37. Shi L, Song K, Rane S, Sun X, Li H, Meng Q. Factors associated with job satisfaction by Chinese  
31 primary care providers. *Primary health care research & development* 2014;15:46-57.  
32  
33 38. LIU Liang, LUO Da, BI Chang-wei, CHEN Xin. Study on the Medical and Health Resource Allocation  
34 of Tianjin Based on Gini Coefficient and and Agglomeration Degree. *Chinese Health Economics* 2019;48-  
35 50(in Chinese).  
36  
37 39. LU Jie,et.al. a comprehensive analysis on spatial agglomeration effect and inequality of health resource  
38 allocation in Gansu province. *Chinese Journal of Health Statistics* 2019;36:222-5(in Chinese).  
39  
40 40. Chakraborty R, Chakraborti C. India, health inequities, and a fair healthcare provision: A perspective  
41 from health capability. *Journal of Human Development and Capabilities* 2015;16:567-80.  
42  
43  
44  
45  
46  
47  
48  
49  
50  
51  
52  
53  
54  
55  
56  
57  
58  
59  
60

(a)

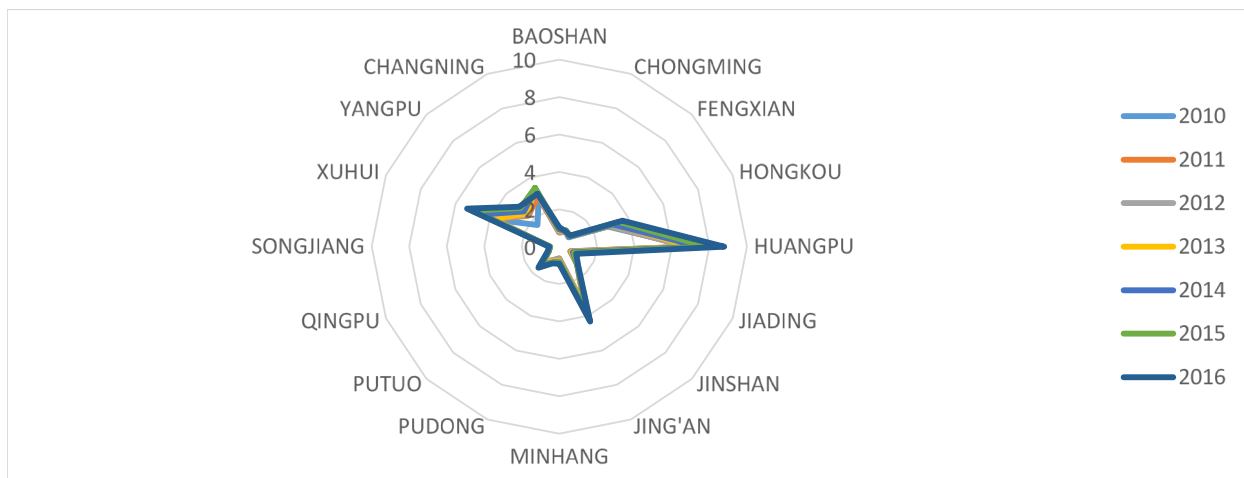

(b)

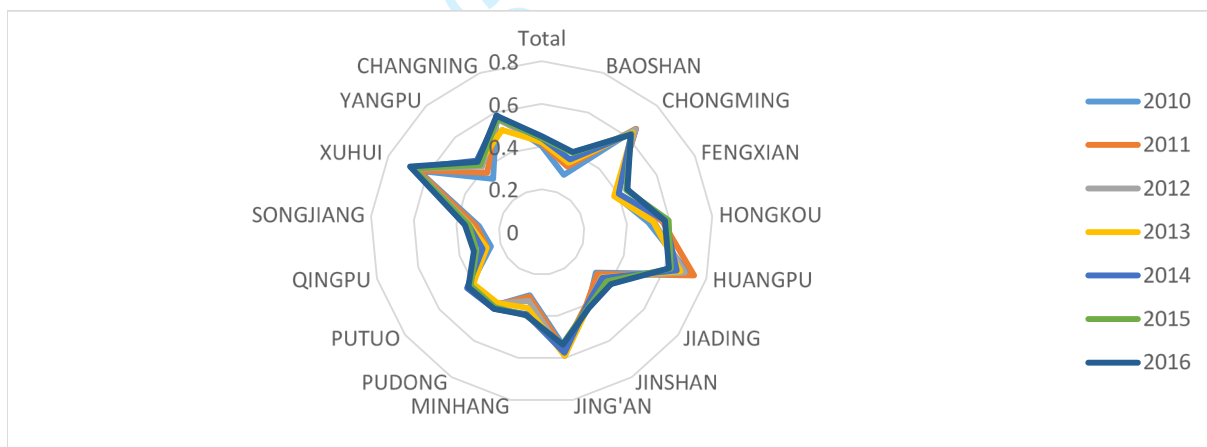

Fig.1 Per 1000 doctors in health institutions across the districts from 2010 to 2016. (a) presents per 1000 doctors in hospitals across the districts from 2010 to 2016;(b) presents per 1000 doctors per 1000 population in PHCs across the districts from 2010 to 2016

(a)

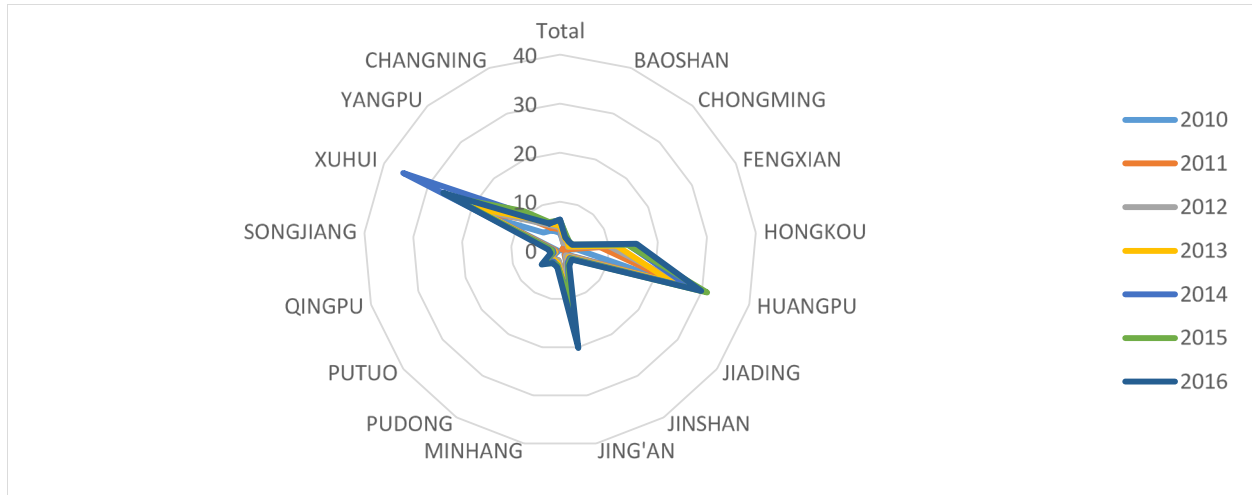

(b)

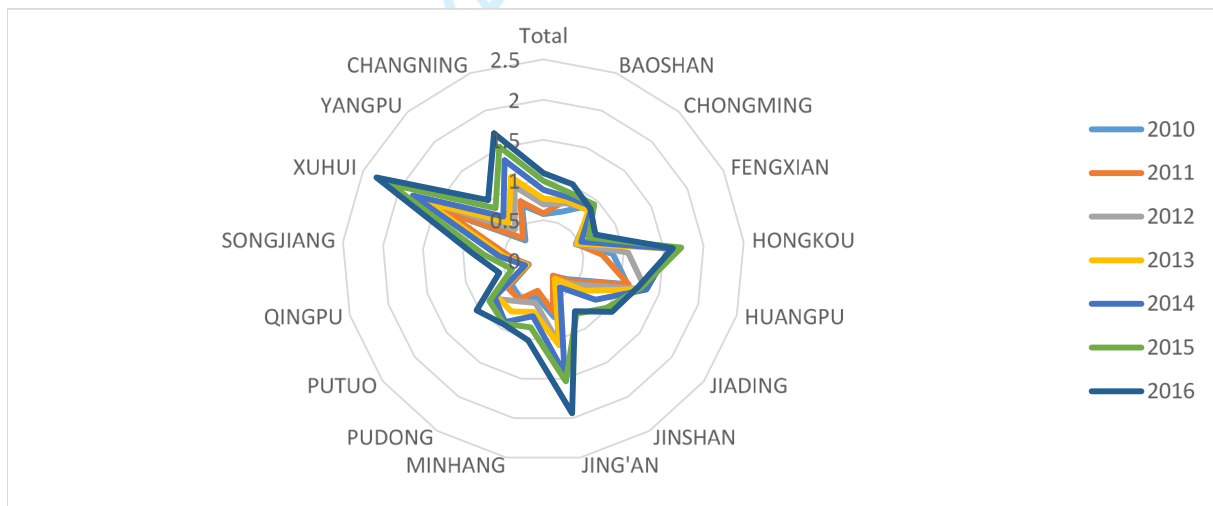

Fig.2 The number of equipment above ¥ 10,000 per 1000 in health institutions from 2010 to 2016 (a) presents the number of equipment above ¥ 10,000 per 1000 in hospitals from 2010 to 2016;(b) presents the number of equipment above ¥ 10,000 per 1000 in PHCs from 2010 to 2016

(a)

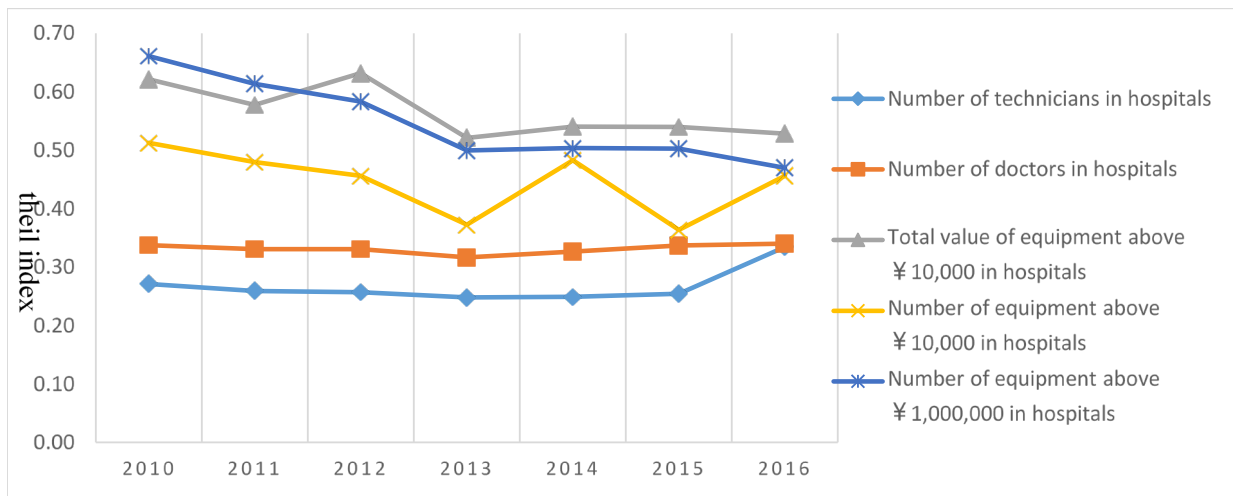

(b)

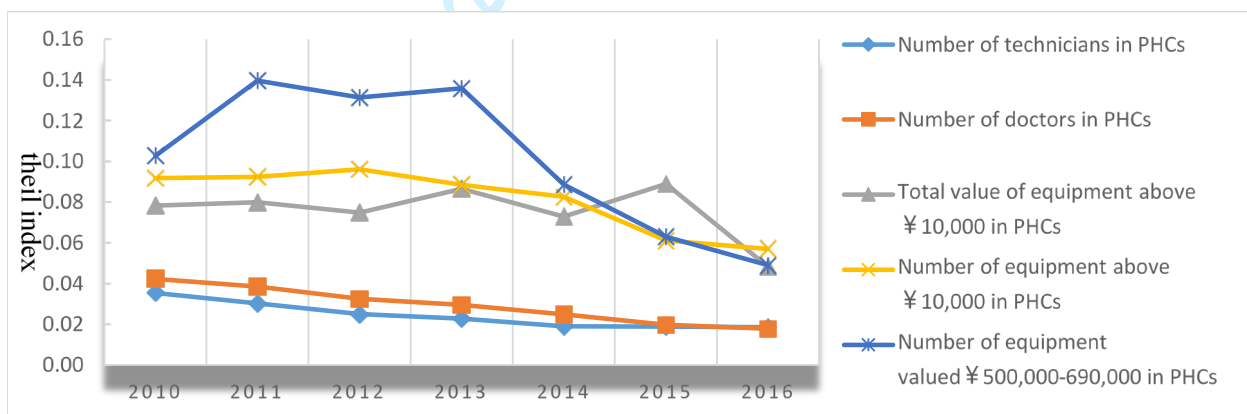

Fig. 3 Trends of the Theil indexes for the health resource in health institutions from 2010 to 2016

(a) presents trends of the Theil indexes for the health resource in hospitals from 2010 to 2016;

(b) presents trends of the Theil indexes for the health resource in PHCs from 2010 to 2016

## Appendix 1

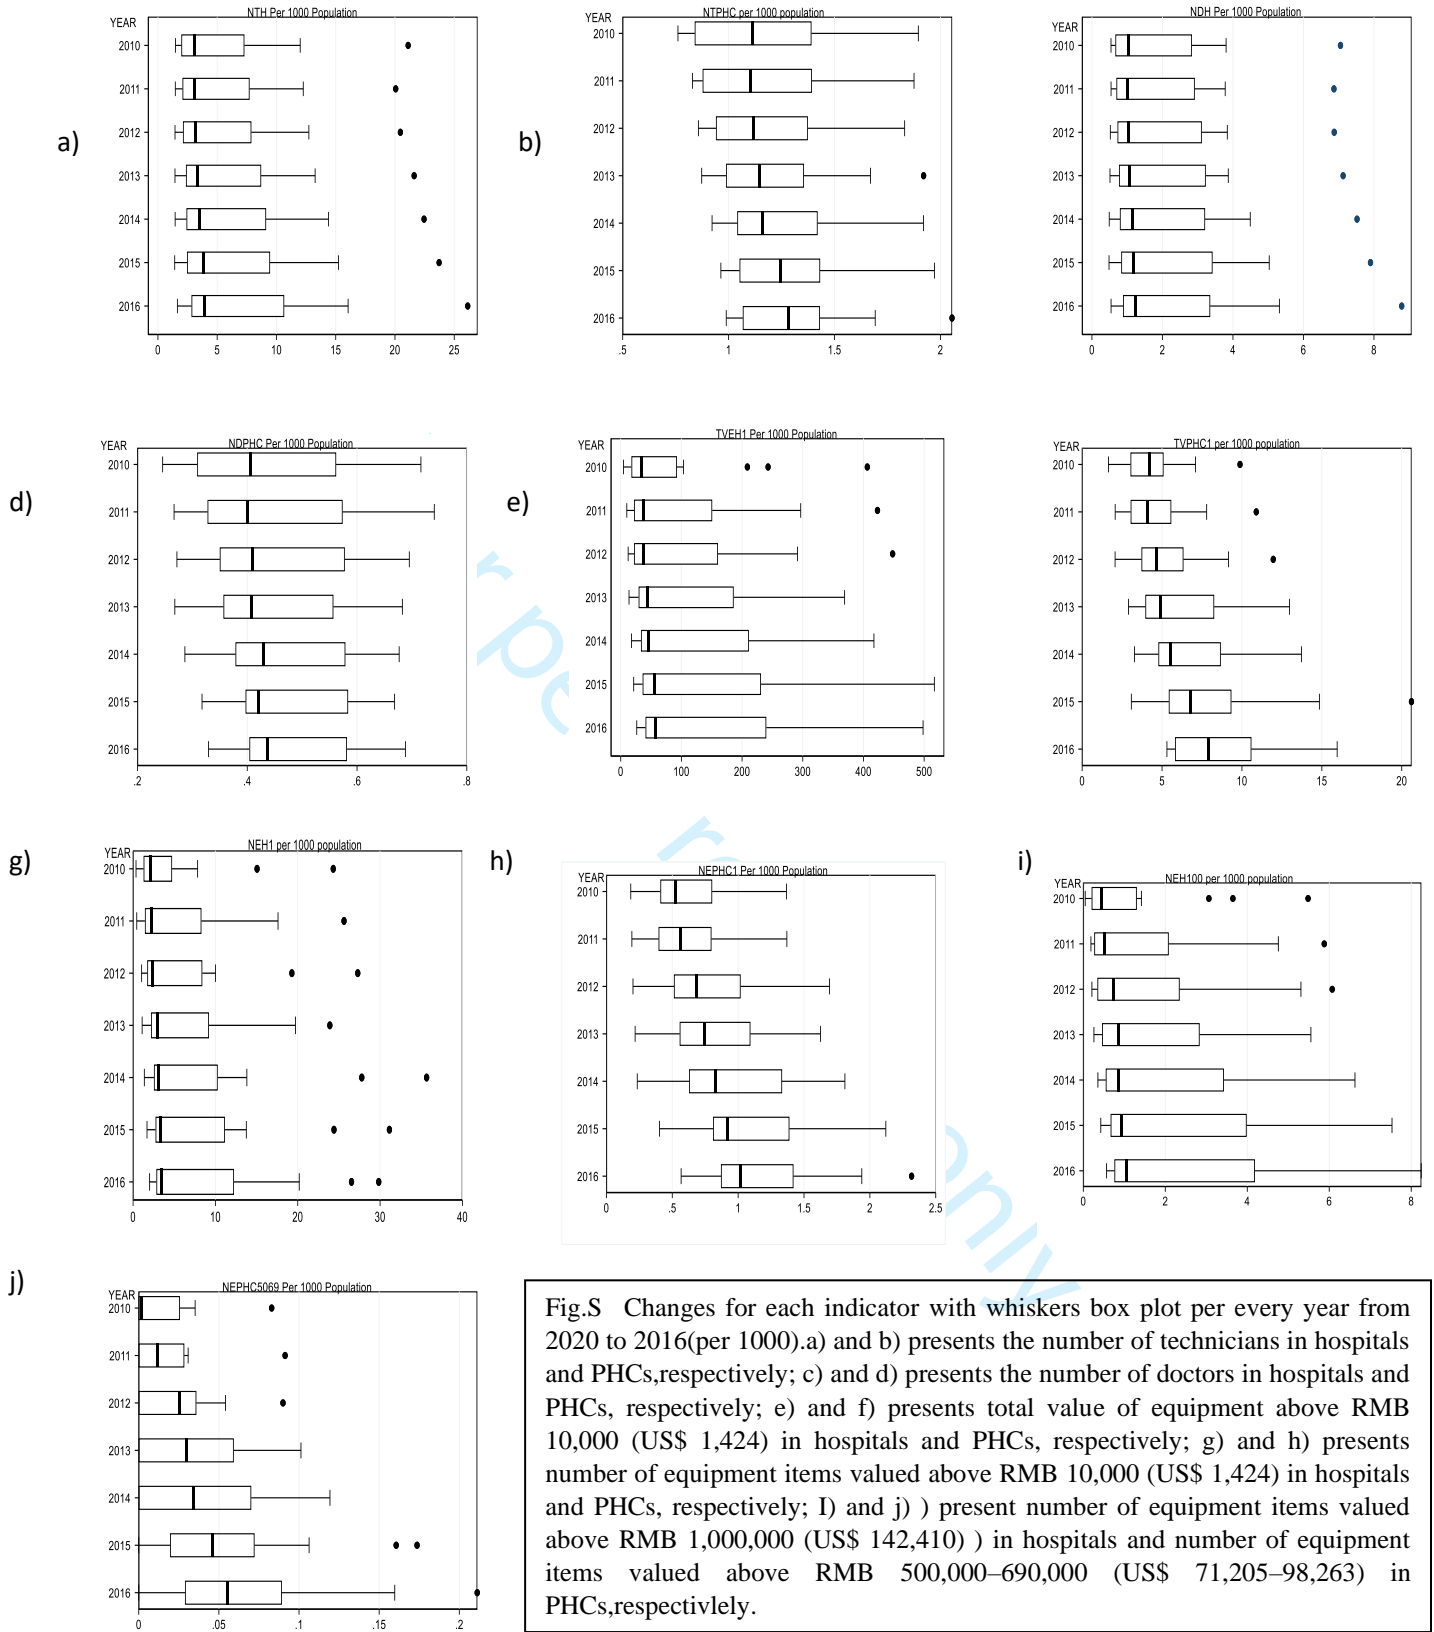



## STROBE Statement—checklist of items that should be included in reports of observational studies

|                              | Item No | Recommendation                                                                                                                                                                                                                                                                                                                                                                                                                                                         | Noted         |
|------------------------------|---------|------------------------------------------------------------------------------------------------------------------------------------------------------------------------------------------------------------------------------------------------------------------------------------------------------------------------------------------------------------------------------------------------------------------------------------------------------------------------|---------------|
| <b>Title and abstract</b>    | 1       | (a) Indicate the study's design with a commonly used term in the title or the abstract                                                                                                                                                                                                                                                                                                                                                                                 | Page1         |
|                              |         | (b) Provide in the abstract an informative and balanced summary of what was done and what was found                                                                                                                                                                                                                                                                                                                                                                    | Page1-2       |
| <b>Introduction</b>          |         |                                                                                                                                                                                                                                                                                                                                                                                                                                                                        |               |
| Background/rationale         | 2       | Explain the scientific background and rationale for the investigation being reported                                                                                                                                                                                                                                                                                                                                                                                   | Page 3-4      |
| Objectives                   | 3       | State specific objectives, including any prespecified hypotheses                                                                                                                                                                                                                                                                                                                                                                                                       | Page4         |
| <b>Methods</b>               |         |                                                                                                                                                                                                                                                                                                                                                                                                                                                                        |               |
| Study design                 | 4       | Present key elements of study design early in the paper                                                                                                                                                                                                                                                                                                                                                                                                                | Page4-5       |
| Setting                      | 5       | Describe the setting, locations, and relevant dates, including periods of recruitment, exposure, follow-up, and data collection                                                                                                                                                                                                                                                                                                                                        | Page5-6       |
| Participants                 | 6       | (a) <i>Cohort study</i> —Give the eligibility criteria, and the sources and methods of selection of participants. Describe methods of follow-up<br><i>Case-control study</i> —Give the eligibility criteria, and the sources and methods of case ascertainment and control selection. Give the rationale for the choice of cases and controls<br><i>Cross-sectional study</i> —Give the eligibility criteria, and the sources and methods of selection of participants | No applicable |
|                              |         | (b) <i>Cohort study</i> —For matched studies, give matching criteria and number of exposed and unexposed<br><i>Case-control study</i> —For matched studies, give matching criteria and the number of controls per case                                                                                                                                                                                                                                                 | No applicable |
| Variables                    | 7       | Clearly define all outcomes, exposures, predictors, potential confounders, and effect modifiers. Give diagnostic criteria, if applicable                                                                                                                                                                                                                                                                                                                               | Page4-5       |
| Data sources/<br>measurement | 8*      | For each variable of interest, give sources of data and details of methods of assessment (measurement). Describe comparability of assessment methods if there is more than one group                                                                                                                                                                                                                                                                                   | Page4-6       |
| Bias                         | 9       | Describe any efforts to address potential sources of bias                                                                                                                                                                                                                                                                                                                                                                                                              | Page14        |
| Study size                   | 10      | Explain how the study size was arrived at                                                                                                                                                                                                                                                                                                                                                                                                                              | Page5-6       |
| Quantitative variables       | 11      | Explain how quantitative variables were handled in the analyses. If applicable, describe which groupings were chosen and why                                                                                                                                                                                                                                                                                                                                           | Page5         |
| Statistical methods          | 12      | (a) Describe all statistical methods, including those used to control for confounding                                                                                                                                                                                                                                                                                                                                                                                  | Page6         |
|                              |         | (b) Describe any methods used to examine subgroups and interactions                                                                                                                                                                                                                                                                                                                                                                                                    | Page6         |

|  |  |                                                                                                                                                                                                                                                                                                           |               |
|--|--|-----------------------------------------------------------------------------------------------------------------------------------------------------------------------------------------------------------------------------------------------------------------------------------------------------------|---------------|
|  |  | (c) Explain how missing data were addressed                                                                                                                                                                                                                                                               | No applicable |
|  |  | (d) <i>Cohort study</i> —If applicable, explain how loss to follow-up was addressed<br><i>Case-control study</i> —If applicable, explain how matching of cases and controls was addressed<br><i>Cross-sectional study</i> —If applicable, describe analytical methods taking account of sampling strategy |               |
|  |  | (e) Describe any sensitivity analyses                                                                                                                                                                                                                                                                     | No applicable |

Continued on next page

For peer review only

| <b>Results</b>           |     |                                                                                                                                                                                                              |                      |
|--------------------------|-----|--------------------------------------------------------------------------------------------------------------------------------------------------------------------------------------------------------------|----------------------|
| Participants             | 13* | (a) Report numbers of individuals at each stage of study—eg numbers potentially eligible, examined for eligibility, confirmed eligible, included in the study, completing follow-up, and analysed            | Page7-8              |
|                          |     | (b) Give reasons for non-participation at each stage                                                                                                                                                         | No applicable        |
|                          |     | (c) Consider use of a flow diagram                                                                                                                                                                           | No applicable        |
| Descriptive data         | 14* | (a) Give characteristics of study participants (eg demographic, clinical, social) and information on exposures and potential confounders                                                                     | Page7                |
|                          |     | (b) Indicate number of participants with missing data for each variable of interest                                                                                                                          | No applicable        |
|                          |     | (c) <i>Cohort study</i> —Summarise follow-up time (eg, average and total amount)                                                                                                                             | No applicable        |
| Outcome data             | 15* | <i>Cohort study</i> —Report numbers of outcome events or summary measures over time                                                                                                                          | <i>No applicable</i> |
|                          |     | <i>Case-control study</i> —Report numbers in each exposure category, or summary measures of exposure                                                                                                         | <i>No applicable</i> |
|                          |     | <i>Cross-sectional study</i> —Report numbers of outcome events or summary measures                                                                                                                           | <i>Page7-11</i>      |
| Main results             | 16  | (a) Give unadjusted estimates and, if applicable, confounder-adjusted estimates and their precision (eg, 95% confidence interval). Make clear which confounders were adjusted for and why they were included | No applicable        |
|                          |     | (b) Report category boundaries when continuous variables were categorized                                                                                                                                    | No applicable        |
|                          |     | (c) If relevant, consider translating estimates of relative risk into absolute risk for a meaningful time period                                                                                             | No applicable        |
| Other analyses           | 17  | Report other analyses done—eg analyses of subgroups and interactions, and sensitivity analyses                                                                                                               | No applicable        |
| <b>Discussion</b>        |     |                                                                                                                                                                                                              |                      |
| Key results              | 18  | Summarise key results with reference to study objectives                                                                                                                                                     | Page12               |
| Limitations              | 19  | Discuss limitations of the study, taking into account sources of potential bias or imprecision. Discuss both direction and magnitude of any potential bias                                                   | Page14               |
| Interpretation           | 20  | Give a cautious overall interpretation of results considering objectives, limitations, multiplicity of analyses, results from similar studies, and other relevant evidence                                   | Page11-14            |
| Generalisability         | 21  | Discuss the generalisability (external validity) of the study results                                                                                                                                        | Page15               |
| <b>Other information</b> |     |                                                                                                                                                                                                              |                      |
| Funding                  | 22  | Give the source of funding and the role of the funders for the present study and, if applicable, for the original study on which the present article is based                                                | <b>Page15</b>        |

\*Give information separately for cases and controls in case-control studies and, if applicable, for exposed and unexposed groups in cohort and cross-sectional studies.

1  
2  
3  
4  
5  
6  
7  
8  
9  
10  
11  
12  
13  
14  
15  
16  
17  
18  
19  
20  
21  
22  
23  
24  
25  
26  
27  
28  
29  
30  
31  
32  
33  
34  
35  
36  
37  
38  
39  
40  
41  
42  
43  
44  
45  
46  
47  
48  
49  
50  
51  
52  
53  
54  
55  
56  
57  
58  
59  
60

**Note:** An Explanation and Elaboration article discusses each checklist item and gives methodological background and published examples of transparent reporting. The STROBE checklist is best used in conjunction with this article (freely available on the Web sites of PLoS Medicine at <http://www.plosmedicine.org/>, Annals of Internal Medicine at <http://www.annals.org/>, and Epidemiology at <http://www.epidem.com/>). Information on the STROBE Initiative is available at [www.strobe-statement.org](http://www.strobe-statement.org).

For peer review only

# BMJ Open

## Differences in regional distribution and inequality in health-resource allocation at hospital and primary health center levels: A longitudinal study in Shanghai, China

|                                 |                                                                                                                                                                                                                                                                                                                                                                                                                                                                                                                                                                                                                                                                                                                                                               |
|---------------------------------|---------------------------------------------------------------------------------------------------------------------------------------------------------------------------------------------------------------------------------------------------------------------------------------------------------------------------------------------------------------------------------------------------------------------------------------------------------------------------------------------------------------------------------------------------------------------------------------------------------------------------------------------------------------------------------------------------------------------------------------------------------------|
| Journal:                        | <i>BMJ Open</i>                                                                                                                                                                                                                                                                                                                                                                                                                                                                                                                                                                                                                                                                                                                                               |
| Manuscript ID                   | bmjopen-2019-035635.R2                                                                                                                                                                                                                                                                                                                                                                                                                                                                                                                                                                                                                                                                                                                                        |
| Article Type:                   | Original research                                                                                                                                                                                                                                                                                                                                                                                                                                                                                                                                                                                                                                                                                                                                             |
| Date Submitted by the Author:   | 15-Apr-2020                                                                                                                                                                                                                                                                                                                                                                                                                                                                                                                                                                                                                                                                                                                                                   |
| Complete List of Authors:       | <p>dong, enhong; Shanghai University of Medicine and Health Sciences, liu, shipeng; Department of Pediatrics of De Zhou's People's Hospital<br/>           chen, minjie; Shanghai Jiao Tong University School of Medicine Affiliated Renji Hospital<br/>           Wang, Hongmei; University of Nebraska Medical Center<br/>           Chen, Li-Wu; University of Nebraska Medical Center, Health Services Research and Administration<br/>           xu, ting; Shanghai University of Medicine and Health Sciences, School of Nursing and Health Management<br/>           wang, tao; Tongji University School of Medicine, Shanghai East Hospital<br/>           zhang, lufa; Shanghai Jiao Tong University, School of International and Public Affairs</p> |
| <b>Primary Subject Heading</b>: | Health economics                                                                                                                                                                                                                                                                                                                                                                                                                                                                                                                                                                                                                                                                                                                                              |
| Secondary Subject Heading:      | Health policy, Health services research                                                                                                                                                                                                                                                                                                                                                                                                                                                                                                                                                                                                                                                                                                                       |
| Keywords:                       | Health economics < HEALTH SERVICES ADMINISTRATION & MANAGEMENT, HEALTH ECONOMICS, Human resource management < HEALTH SERVICES ADMINISTRATION & MANAGEMENT                                                                                                                                                                                                                                                                                                                                                                                                                                                                                                                                                                                                     |
|                                 |                                                                                                                                                                                                                                                                                                                                                                                                                                                                                                                                                                                                                                                                                                                                                               |

SCHOLARONE™  
Manuscripts



I, the Submitting Author has the right to grant and does grant on behalf of all authors of the Work (as defined in the below author licence), an exclusive licence and/or a non-exclusive licence for contributions from authors who are: i) UK Crown employees; ii) where BMJ has agreed a CC-BY licence shall apply, and/or iii) in accordance with the terms applicable for US Federal Government officers or employees acting as part of their official duties; on a worldwide, perpetual, irrevocable, royalty-free basis to BMJ Publishing Group Ltd ("BMJ") its licensees and where the relevant Journal is co-owned by BMJ to the co-owners of the Journal, to publish the Work in this journal and any other BMJ products and to exploit all rights, as set out in our [licence](#).

The Submitting Author accepts and understands that any supply made under these terms is made by BMJ to the Submitting Author unless you are acting as an employee on behalf of your employer or a postgraduate student of an affiliated institution which is paying any applicable article publishing charge ("APC") for Open Access articles. Where the Submitting Author wishes to make the Work available on an Open Access basis (and intends to pay the relevant APC), the terms of reuse of such Open Access shall be governed by a Creative Commons licence – details of these licences and which [Creative Commons](#) licence will apply to this Work are set out in our licence referred to above.

Other than as permitted in any relevant BMJ Author's Self Archiving Policies, I confirm this Work has not been accepted for publication elsewhere, is not being considered for publication elsewhere and does not duplicate material already published. I confirm all authors consent to publication of this Work and authorise the granting of this licence.

1  
2  
3 **Differences in regional distribution and inequality in health-resource allocation at hospital**  
4 **and primary health center levels: A longitudinal study in Shanghai, China**  
5

6  
7 Enhong Dong<sup>1</sup>, Shipeng Liu <sup>2</sup>,Minjie Chen<sup>3</sup>, Hongmei Wang<sup>4</sup>,Liwu Chen<sup>4</sup>,Ting Xu,<sup>1</sup> Tao Wang<sup>5,6</sup>,Lufa  
8 Zhang<sup>7\*</sup>  
9

10  
11  
12 <sup>1</sup> School of Nursing and Health Management, Shanghai University of medicine & Health Science, 279  
13 Zhouzhu Road, Pudong new District, Shanghai 201318, Shanghai, China. <sup>2</sup> Department of Pediatrics ,De  
14 Zhou's People's Hospital, Shandong 253000, Shandong province, China; <sup>3</sup> Department of Outpatient and  
15 Emergency, Renji Hospital Affiliated to Shanghai Jiao Tong University School of Medicine, NO.160 Pujian  
16 Road, Pudong new District, Shanghai,200127,China; <sup>4</sup> Department of Health Services Research &  
17 Administration, College of Public Health, 984350 University Nebraska Medical Center, Omaha, NE 68198-  
18 4350;<sup>5</sup> Department of Emergency, Shanghai East Hospital, Tongji University School of Medicine, Shanghai  
19 200120,China.<sup>6</sup> College of Arts and Media, Tongji University, Shanghai 200092 , China.<sup>7</sup> School of  
20 International and Public Affairs, Shanghai Jiao Tong University.1954 Huashan Road, Xuhui District,  
21 Shanghai 200030, Shanghai, China.  
22  
23  
24  
25  
26  
27  
28  
29  
30  
31  
32  
33

34  
35 \*Corresponding author: E-mail: Lufa Zhang zhanglf@sjtu.edu.cn  
36  
37  
38  
39  
40  
41  
42  
43  
44  
45  
46  
47  
48  
49  
50  
51  
52  
53  
54  
55  
56  
57  
58  
59  
60

## Abstract

**Objectives:** To analyze differences in regional distribution and inequality in health-resource allocation at the hospital and primary health center (PHC) levels in Shanghai over 7 years.

**Design:** A longitudinal survey using 2010–2016 data, which were collected for analysis.

**Setting:** The study was conducted at the hospital and PHC levels in Shanghai, China.

**Outcome measures:** Ten health-resource indicators were used to measure health-resource distribution at the hospital and PHC levels. In addition, the Theil index was calculated to measure inequality in health-resource allocation.

**Results:** All quantities of health-care resources per 1000 people in hospitals and PHCs increased across Shanghai districts from 2010 to 2016. Relative to suburban districts, the central districts had higher ratios, both in terms of doctors and equipment, and had faster growth in the doctor indicator and slower growth in the equipment indicator in hospitals and PHCs. The Theil indices of all health-resource allocation in hospitals had higher values compared with those in PHCs every year from 2010 to 2016; furthermore, the Theil indices of the indicators, except for technicians and doctors in hospitals, all exhibited downward time trends in hospitals and PHCs.

**Conclusions:** Increased health-care resources and reduced inequality of health-resource allocation in Shanghai during the 7 years indicated that measures taken by the Shanghai government to deepen the new round of healthcare reform in China since 2009 had been successful. Meanwhile there still existed regional difference between urban and rural areas and inequality across different medical institutions. To solve these problems, we prescribe increased wages, improved working conditions, and more open access to career development for doctors and nurses; reduced investments in redundant equipment in hospitals; and other incentives for balancing the health workforce between hospitals and PHCs.

**Keywords:** Health-care resources, regional difference, inequality, hospital, primary health center (PHC)

### Strengths and limitations of this study

►► Few studies have focused on the association between health-resource allocation and healthcare reform, making the findings of the present study generalizable and applicable to countrywide policies and interventions.

►► A future study will be conducted on health-resource distribution and inequality in health-



resource allocation in Shanghai from 2017 until the present, and its findings will be compared with those of the present study, to provide robust policy prescriptions for China and other developing countries.

►► The measurement of inequality in the allocation of resources carried out in this study does not account for differences in health status and need for health care.

►► Because this study chose indicators of the quality of health-care resources rather than of health service, unaccounted-for factors represented by these indicators could have influenced the observed differences. Thus, the study's conclusion should be generalized with caution.

## 1. Introduction

Reasonable health-resource allocation is essential to achieving health service equity, which contributes to public health and mitigates social conflict<sup>1-3</sup>. In many countries, healthcare reform aims to provide universal and equitable access to health care, which is recognized as a fundamental human right. The distribution of health-care resources is a critical component of health-care access. Furthermore, equity is a basic principle of health-resource allocation, and it is foundational to achieving fairness in the provision of health services. Many studies have demonstrated that wide access to health care can play a crucial role in promoting regional health equity<sup>4-6</sup>. The equitable allocation of health-care resources helps deliver health-care resources to those most in need and ensures accessibility to basic health services as well as fairness for vulnerable populations<sup>7</sup>. Moreover, inequality in health-care resources has adverse consequences, such as the uneven distribution of health-care allocation, which in turn leads to growing inequalities between the rich and poor with respect to health and the economic burden of disease<sup>8</sup>. In 2009, China launched a new round of healthcare reform with the aim of providing households with secure, efficient, convenient, equitable, and affordable health-care services by reversing the early 1980s' moves to a market-oriented health system. The reform strengthened the government's role in healthcare, its commitment to equity, and its willingness to experiment with regulated market approaches. Besides genetic characteristics, the Chinese healthcare system also has some more specific features. Take the health financing system as an example, it collects revenues from three main sources: government expenditure, social expenditure and (out-of-pocket) OOP payments in the domestic classification. The revenues are distributed through the basic medical security system consisting of Basic Medical Insurance (BMI) schemes and Medical Financial Assistance (MFA) schemes for the poor to cover urban and rural residents in China. Under BMI, more specifically, employees in

1  
2  
3 urban areas are covered by Urban Employee Basic Medical Insurance (UEBMI), unemployed  
4 residents in urban areas are covered by Urban Residents Basic Medical Insurance (URBMI) and  
5 residents in rural areas are covered by New Rural Cooperative Medical System (NRCMS). The  
6 MFA is the security net for the poor in both urban and rural areas, which helps them to enroll in  
7 basic medical insurance and also provides extra reimbursement for medical expenses. The public  
8 health system, which is mainly financed by the government, provides basic public health services  
9 to all residents free of charge. The Chinese Ministry of Health divides medical institutions into  
10 three levels by their tasks and functions to form a hierarchical medical system. In this hierarchy,  
11 PHCs (the first level), secondary hospitals (the second level), and tertiary hospitals (the third level)  
12 provide primary, secondary, and tertiary care, respectively<sup>9</sup>. In this hierarchical medical system in  
13 China, patients are channeled toward the appropriate-level institution for treatment and are  
14 encouraged to first visit PHCs when they need to see a doctor. Patients are then referred up the  
15 hierarchy where necessary, and doctors have the right to decide such referrals. This hierarchical  
16 medical system was designed to enable the government to allocate health-care resources efficiently  
17 among patients in China. However, due to the considerable gaps in health-care resources and medical  
18 techniques between hospitals and PHCs, patients' distrust of PHCs hinders the PHCs' role of being the first  
19 contact and the realization of the two-way referral. The first diagnosis occurring in PHCs and two-way  
20 referral is still a practice with obstructions and poor effectiveness, thus highlighting the problem  
21 of 'difficult and costly access to healthcare services' in China. So, the government has been making  
22 attempts to strengthen primary care to reduce self-referral to hospitals in the cities.

23  
24  
25  
26  
27  
28  
29  
30  
31  
32  
33  
34  
35  
36  
37 Accordingly, since 2009, the Shanghai government has implemented corresponding measures to  
38 allocate health-care resources between hospitals and PHCs, conforming tightly to national health  
39 reform strategies and guidelines. As a result of these measures, the quantity of medical equipment  
40 and numbers of doctors and nurses have increased, and the distribution of health-care resources  
41 has become more balanced<sup>10-12</sup>. However, many studies have noted widening urban-rural  
42 disparities in health-care resources across Chinese medical institutions of various types<sup>13-18</sup>,  
43 including the one conducted in Shanghai<sup>12</sup>. Studies have examined variations in the quantity and  
44 inequality in health-resource allocation in China; however, they have overlooked differences over  
45 time in health-resource allocation at two institutional levels as well as their association with  
46 China's 2009 healthcare reform. Considering the overall goal of China's new health-care  
47 guidelines and plans to promote more equitable and efficient health-care resource distribution, it  
48  
49  
50  
51  
52  
53  
54  
55  
56  
57  
58  
59  
60

is essential to study the differences in health-resource distribution and the inequity of allocation in Shanghai over time since the 2009 reforms.

Therefore, the purpose of this study was first, to investigate regional difference in health-resource distribution and second, to describe the inequity in their allocation at the hospital and PHC level over 7 years (2010–2016) in Shanghai, in order to see if both of them have changed after the new round of health reform in China since 2009.

## 2. Methods

### 2.1 Patient and public involvement

This study used secondary data from Yearbooks (2010–2016) in Shanghai of China and did not require patient or public involvement.

### 2.2 Data source

This study used data from the Shanghai Medical Statistical Yearbook from 2010–2016 and the Shanghai Statistical Yearbook from 2010–2016, which are published by the Shanghai Health Commission and Shanghai Statistics Bureau, respectively. Because China has pushed hospitals and PHCs to establish a hierarchical medical system to improve health service quality, we measured health-resource allocation to evaluate the effect of these policies on hospitals and PHCs. The indicators used included the number of health technicians in hospitals or PHCs, the number of doctors in hospitals or PHCs, the total value of medical equipment above RMB 10,000 (US\$ 1424) in hospitals or PHCs, the number of medical equipment items valued above RMB 10,000 (US\$ 1424) in hospitals or PHCs, and the number of medical equipment items valued above RMB 1,000,000 (US\$ 142,410) in hospitals and between RMB 500,000 and 690,000 (US\$ 71,205 and 98,263) in PHCs. These data were taken from the 2010 to 2016 editions of the Shanghai Medical Statistical Yearbook. Table 1 presents all 10 indicators and their definitions along with how they were measured. Per capita measures of all the indicators were calculated after obtaining the annual population of the whole city and every administrative district from the 2010–2016 editions of the Shanghai Statistical Yearbook

**Table 1 Indicators of health-resource allocation, their definitions, and how they were measured**

| Indicators                         | Definitions                               | How they were measured                                       |
|------------------------------------|-------------------------------------------|--------------------------------------------------------------|
| Number of technicians in hospitals | It refers to the workforce* in hospitals. | Number of technicians in hospitals divided by the population |

|                                                                                      |                                                                                                                                      |                                                                                                                |
|--------------------------------------------------------------------------------------|--------------------------------------------------------------------------------------------------------------------------------------|----------------------------------------------------------------------------------------------------------------|
| Number of doctors in hospitals                                                       | It refers to the physicians <sup>#</sup> in hospitals.                                                                               | Number of doctors in hospitals divided by the population                                                       |
| Total value of equipment above RMB 10,000 (US\$ 1,424) in hospitals                  | It refers to total monetary value equal to or more than RMB 10,000(US\$ 1,424) of durable equipment <sup>+</sup> in hospitals        | Total value of equipment above RMB 10,000 (US\$ 1,424) in hospitals divided by the population                  |
| Number of equipment items valued above RMB 10,000 (US\$ 1,424) in hospitals          | It refers to the number of durable equipment <sup>+</sup> items valued at or more than RMB 10,000 (US\$ 1,424) in hospitals.         | Number of equipment items valued above RMB 10,000 (US\$ 1,424) in hospitals divided by the population          |
| Number of equipment items valued above RMB 1,000,000 (US\$ 142,410) in hospitals     | It refers to the number of durable equipment <sup>+</sup> items valued at or more than RMB 1,000,000 (US\$ 1,424) in hospitals.      | Number of equipment items valued above RMB 1,000,000 (US\$ 142,410) in hospitals divided by the population     |
| Number of technicians in PHCs                                                        | It refers to the workforce* in PHCs.                                                                                                 | Number of technicians in PHCs divided by the population                                                        |
| Number of doctors in PHCs                                                            | It refers to the actual physicians <sup>#</sup> in PHCs.                                                                             | Number of doctors in PHCs divided by the population                                                            |
| Total value of equipment above RMB 10,000 (US\$ 1,424) in PHCs                       | It refers to the total monetary value at or more than RMB 10,000 (US\$ 1,424) of durable equipment <sup>+</sup> in PHCs.             | Total value of equipment above RMB 10,000 (US\$ 1,424) in PHCs divided by the population                       |
| Number of equipment items valued above RMB 10,000 (US\$ 1,424) in PHCs               | It refers to the number of durable equipment <sup>+</sup> items valued at or more than RMB 10,000(US\$ 1,424) in PHCs.               | Number of equipment items valued above RMB 10,000 (US\$ 1,424) in PHCs divided by the population               |
| Number of equipment items valued at RMB 500,000–690,000 (US\$ 71,205–98,263) in PHCs | It refers to the number of durable equipment <sup>+</sup> items valued between RMB 500,000 and 690,000 (US\$ 71,205–98,263) in PHCs. | Number of equipment items valued at RMB 500,000–690,000 (US\$ 71,205–98,263) in PHCs divided by the population |

\*Workforce refers to who assist medical staff complete tasks around their assigned unit or clinic and accommodate patient needs, including pharmacists and radiologists; registered nurses were excluded. #Physicians refer to who hold a practicing physician certificate, including practicing physicians and assistants in China. Those who are engaged in the management of health workers as part of the health workforce, such as presidents, vice presidents, and party secretaries were excluded.+ Durable equipment refers to that is intended to withstand repeated use by professional and patients. This includes diagnostic equipment, including medical

1  
2  
3 imaging machines, such as ultrasound and MRI machines, PET and CT scanners, and X-ray machines; treatment equipment,  
4 including infusion pumps, medical lasers, and LASIK surgical machines; and other medical equipment in Chinese health  
5 institutions.  
6

7 Shanghai is one of four directly controlled municipalities of the People's Republic of China, and  
8 it is further divided into 16 districts, among which are seven urban and nine suburban districts.  
9 Shanghai's urban administrative divisions are as follows: Huangpu, Xuhui, Changning, Jing'an,  
10 Putuo, Hongkou, and Yangpu. Its rural administrative divisions are Minhang, Baoshan, Jiading,  
11 Pudong New Area, Jinshan, Songjiang, Qingpu, Fengxian, and Chongming. Over 7 years from  
12 2010 to 2016, Shanghai had three administration division mergers aimed at facilitating the long-  
13 term development of all the districts involved; enhance the administrative efficiency of urban  
14 function and resource distribution for the city; as well as reduce administrative costs. Specifically,  
15 in 2011, Luwan District was merged with a neighboring district to form the new Huangpu District;  
16 Zhabei was merged with Jing'an District in 2015; and Chongming County was upgraded to  
17 Chongming District in 2016. To maintain data comparability, we formatted the new data of the 16  
18 administration divisions by integrating the data of the two merged districts of Luwan and Zhabei  
19 into those of Huangpu and Jing'an, respectively.  
20  
21  
22  
23  
24  
25  
26  
27  
28

### 29 **2.3 Data analysis**

30  
31 Many measures exist for evaluating the equity of health-resource allocation, such as the Lorenz  
32 curve, Gini coefficient, and Theil index. The Theil index is a statistic primarily used to measure  
33 income inequality or other economic phenomena among different individuals or within varied  
34 groups. It is a special case of the generalized entropy index and one of the most widely used  
35 measures of inequality in regional economic development. The Theil index was proposed by  
36 econometrician Henri Theil at Erasmus University Rotterdam <sup>19</sup>, and it can be formulated as  
37 follows:  
38  
39  
40  
41  
42  
43

$$44 T = \frac{1}{n} \sum_{i=1}^n \frac{y_i}{\bar{y}} \log\left(\frac{y_i}{\bar{y}}\right), (1)$$

45  
46  
47

48 where  $T$  is the Theil index, which represents income allocation inequality, and  $y_i$  and  $\bar{y}$  is the  
49 income of individual  $i$  and the average income of the population, respectively.  
50

51 The Theil index has another form to measure the inequality between different groups, which is  
52 known as the between-region difference. This formula can be written as follows:  
53  
54  
55  
56  
57

$$T = \sum_{i=1}^k w_i \ln\left(\frac{w_i}{e_i}\right), \quad (2)$$

where  $w_i$  represents the proportion of the income of group  $i$  accounting for the total income of all groups and  $e_i$  represents the proportion of the people in group  $i$  accounting for the overall population of all groups. In this study, we defined  $w_i$  as the proportion of health-care resources in district  $i$  accounting for the resources of the whole city, and we defined  $e_i$  as the proportion of the people in district  $i$  accounting for the overall population of the city. The value of the Theil index ranges from 0 to 1 and 0 represents perfect equality, while 1 means completely unequal.

### 3. Results

#### 3.1 Differences in regional distribution of health-resource allocation at the hospital and PHC levels in Shanghai from 2010 to 2016

Table 2 presents descriptive statistics of indicators of health-resource allocation in Shanghai's hospitals and PHCs. Table 3 presents changes in numbers and growth rates related to health-resource allocation in Shanghai's hospitals and PHCs. Further details of changes for each indicator with whiskers box plot per every year from 2010 to 2016 are presented in appendix (see the additional file). As indicated by the table, the health-care resources in hospitals and PHCs increased gradually from 2010 to 2016, the quantities of health-care resources per 1000 of the population all increased, and the number of equipment items grew faster than did the health workforce in hospitals and PHCs overall. For example, from 2010 to 2016, the number of equipment items valued above RMB 10,000 (US\$ 1424) per 1000 people and above RMB 1,000,000 (US\$ 142,410) per 1000 people in hospitals increased by 73.9% and 122.7%, respectively; furthermore, the numbers of technicians and doctors per 1000 people in hospitals increased by 30.6% and 25.5%, respectively, more than twice the corresponding numbers of technicians and doctors in PHCs during the same period.

As for administrative divisions, from 2010 to 2016, an increasing trend was observed in the numbers of doctors and equipment items per 1000 people both in hospitals and PHCs across all districts except for Chongming District. Chongming had an unexpected decrease from 0.94 in 2010 to 0.87 in 2016 for the number of equipment items valued above RMB 10,000 (US\$ 1424) per 1000 people in PHCs.



In common for every district was a similar trend of the number of equipment per 1000 of the population growing faster than that of doctors, in both hospital and PHCs from 2010 to 2016. Noticeably, whether in hospitals or PHCs, central districts had higher ratios than did

Table 2 Descriptive Statistics of indicators of health-resource allocation in Shanghai's hospitals and PHCs (2010–2016; per 1000)

| Indicators                                                                              | Obs. | Min. | Max.   | Mean.  | Median |
|-----------------------------------------------------------------------------------------|------|------|--------|--------|--------|
| Number of technicians in hospitals                                                      | 112  | 1.42 | 26.14  | 6.04   | 3.34   |
| Number of doctors in hospitals                                                          | 112  | 0.49 | 8.79   | 2.07   | 1.10   |
| Total value of equipment above RMB 10,000 (US\$ 1,424) in hospitals                     | 112  | 4.51 | 516.87 | 114.33 | 46.49  |
| Number of equipment items valued above RMB 10,000 (US\$ 1,424) in hospitals             | 112  | 0.36 | 35.65  | 6.77   | 2.95   |
| Number of equipment items valued above RMB 1,000,000 (US\$ 142,410) in hospitals        | 112  | 0.05 | 8.24   | 1.87   | 0.81   |
| Number of technicians in PHCs                                                           | 112  | 0.76 | 2.06   | 1.23   | 1.17   |
| Number of doctors in PHCs                                                               | 112  | 0.25 | 0.74   | 0.46   | 0.42   |
| Total value of equipment above RMB 10,000 (US\$ 1,424) in PHCs                          | 112  | 1.65 | 20.61  | 6.33   | 5.35   |
| Number of equipment items valued above RMB 10,000 (US\$ 1,424) in PHCs                  | 112  | 0.19 | 2.32   | 0.86   | 0.79   |
| Number of equipment items valued above RMB 500,000–690,000 (US\$ 71,205–98,263) in PHCs | 112  | 0.00 | 0.21   | 0.04   | 0.03   |

Table 3 Changes in the numbers and growth rates related to health-resource allocation in Shanghai's hospitals and PHCs (2010–2016; per 1000)

| Indicator                                                                        | 2010  | 2011  | 2012  | 2013  | 2014  | 2015   | 2016   | GR     |
|----------------------------------------------------------------------------------|-------|-------|-------|-------|-------|--------|--------|--------|
| Number of technicians in hospitals                                               | 4.21  | 4.33  | 4.48  | 4.75  | 4.97  | 5.21   | 5.49   | 30.6%  |
| Number of doctors in hospitals                                                   | 1.42  | 1.44  | 1.48  | 1.53  | 1.61  | 1.70   | 1.78   | 25.5%  |
| Total value of equipment above RMB 10,000 (US\$ 1,424) in hospitals              | 62.31 | 75.23 | 75.78 | 79.03 | 88.00 | 100.58 | 108.82 | 74.7%  |
| Number of equipment items valued above RMB 10,000 (US\$ 1,424) in hospitals      | 3.66  | 4.38  | 4.76  | 5.09  | 6.39  | 6.20   | 6.36   | 73.9%  |
| Number of equipment items valued above RMB 1,000,000 (US\$ 142,410) in hospitals | 0.09  | 0.11  | 0.12  | 0.13  | 0.15  | 0.18   | 0.19   | 122.7% |
| Number of technicians in PHCs                                                    | 1.06  | 1.08  | 1.10  | 1.12  | 1.15  | 1.18   | 1.21   | 13.4%  |
| Number of doctors in PHCs                                                        | 0.40  | 0.41  | 0.42  | 0.42  | 0.44  | 0.44   | 0.45   | 11.6%  |

|                                                                                         |      |      |      |      |      |      |      |        |
|-----------------------------------------------------------------------------------------|------|------|------|------|------|------|------|--------|
| Total value of equipment above RMB 10,000 (US\$ 1,424) in PHCs                          | 4.22 | 4.42 | 5.21 | 5.89 | 6.53 | 7.68 | 8.26 | 95.8%  |
| Number of equipment items valued above RMB 10,000 (US\$ 1,424) in PHCs                  | 0.58 | 0.58 | 0.70 | 0.77 | 0.88 | 0.99 | 1.09 | 89.0%  |
| Number of equipment items valued above RMB 500,000–690,000 (US\$ 71,205–98,263) in PHCs | 0.01 | 0.01 | 0.01 | 0.01 | 0.02 | 0.02 | 0.02 | 112.4% |

GR = growth rate.

suburban districts both in the number of doctors and equipment per 1000 of the population. This indicated an unchanged distribution concentration in health-care resource allocation among central areas other than rural ones in Shanghai. Figures 1 (a) and (b) illustrate the numbers of doctors in hospitals and PHCs, respectively, per 1000 of the population across Shanghai's districts from 2010 to 2016. As for the number of doctors per 1000 people in hospitals, central districts grew faster than suburban ones did over this period; for example, in hospitals, Xuhui exhibited an increase of 39.47%, Hongkou of 28.57%, and Huangpu of 28.57%, whereas Songjiang and Qingpu only exhibited increases of under 1% in the same period. Even Fengxian, the fastest growing division for ratios of doctors across all rural districts, only exhibited an increase of 14.29%, lower than the 15% average growth rate for hospitals in central districts over the 7 years. By contrast, no PHCs in either central or suburban districts exhibited a marked increase in the number of doctors per 1000 of the population.

Figure 2 (a) and (b) illustrate the number of equipment items valued above RMB 10,000 per 1000 people in hospitals and PHCs, respectively, from 2010 to 2016. A different trend was observed between central and suburban districts in that central districts grew slower in terms of hospitals and PHCs in the same period. For example, from 2010 to 2016, in terms of equipment ratios in hospitals, Huangpu, Xuhui, Jing'an, and Hongkou Districts all exhibited increases in growth rates of 22.75, 76.16, 157.40, and 354.23%, respectively, while Songjiang, Qingpu, and Fengxian Districts all experienced rapid development of more than five-fold in per capita equipment. Similarly, in terms of equipment ratios in PHCs, Changning, Putuo, Jing'an, and Hongkou increased by 100%, while Qingpu and Jinshan increased by more than 200%.

### 3.2 Inequality in health-resource allocation at the hospital and PHC levels in Shanghai from 2010 to 2016



Table 4 and Fig. 3 present the Theil indices of health-resource allocation in Shanghai's hospitals and PHCs from 2010 to 2016. In the same year at different levels of medical institutions, the Theil indices in hospitals were higher than those in PHCs for overall health-care resources, especially for equipment. This indicated greater unfairness of health-care resource allocation in hospitals than in PHCs in Shanghai during this period. For example, in 2016, the Theil indices of the numbers of technicians and doctors in hospitals were 0.33 and 0.34, respectively, whereas the corresponding indices in PHCs were both 0.02. The Theil indices of the total value of equipment above RMB 10,000 (US\$ 1424) and the number of equipment items valued above RMB 10,000 (US\$ 1424) in hospitals were 0.53 and 0.46, respectively, whereas the corresponding indices in PHCs were 0.05 and 0.06, respectively.

Table 4 Theil indices related to health-resource allocation in hospitals and PHCs in Shanghai (2010–2016)

| Indicators                                                                        | 2010 | 2011 | 2012 | 2013 | 2014 | 2015 | 2016 |
|-----------------------------------------------------------------------------------|------|------|------|------|------|------|------|
| Number of technicians in hospitals                                                | 0.27 | 0.26 | 0.26 | 0.25 | 0.25 | 0.25 | 0.33 |
| Number of doctors in hospitals                                                    | 0.34 | 0.33 | 0.33 | 0.32 | 0.33 | 0.34 | 0.34 |
| Total value of equipment above RMB 10,000 (US\$ 1,424) in hospitals               | 0.62 | 0.58 | 0.63 | 0.52 | 0.54 | 0.54 | 0.53 |
| Number of equipment items valued above RMB 10,000 (US\$ 1,424) in hospitals       | 0.51 | 0.48 | 0.46 | 0.37 | 0.48 | 0.36 | 0.46 |
| Number of equipment items valued above RMB 1,000,000 (US\$ 142,410) in hospitals  | 0.66 | 0.61 | 0.58 | 0.50 | 0.50 | 0.50 | 0.47 |
| Number of technicians in PHCs                                                     | 0.04 | 0.03 | 0.03 | 0.02 | 0.02 | 0.02 | 0.02 |
| Number of doctors in PHCs                                                         | 0.04 | 0.04 | 0.03 | 0.03 | 0.02 | 0.02 | 0.02 |
| Total value of equipment above RMB 10,000 (US\$ 1,424) in PHCs                    | 0.08 | 0.08 | 0.07 | 0.09 | 0.07 | 0.09 | 0.05 |
| Number of equipment items valued above RMB 10,000 (US\$ 1,424) in PHCs            | 0.09 | 0.09 | 0.10 | 0.09 | 0.08 | 0.06 | 0.06 |
| Number of equipment items valued RMB 500,000–690,000 (US\$ 71,205–98,263) in PHCs | 0.10 | 0.14 | 0.13 | 0.14 | 0.09 | 0.06 | 0.05 |

1  
2  
3 As for Theil index trends for health-care resources in Shanghai from 2010 to 2016, the indices of  
4 all indicators exhibited a decline for both hospitals and PHCs, except for the numbers of  
5 technicians and doctors in hospitals. This indicated a reduction in the inequality in health  
6 institutions with respect to most health-care resource indicators in Shanghai over the 7 years. From  
7 2010 to 2016, the Theil indices of all the equipment indicators in hospitals, the total value of  
8 equipment above RMB 10,000 (US\$ 1424), the number of equipment items valued above RMB  
9 10,000 (US\$ 1424), and the number of equipment items valued above RMB 1,000,000  
10 (US\$ 142,410) all exhibited declines (despite a slight increase from 2013 to 2014). This indicated  
11 a reduction in the inequality of hardware construction in hospitals in that period.  
12  
13  
14  
15  
16  
17  
18  
19

20 Similarly, regarding the Theil indices of the health-care workforce in PHCs, those for the numbers  
21 of technicians and doctors both exhibited consistent downward trends during the period.  
22 Furthermore, after experiencing some fluctuations during this period, the indices for the total value  
23 of equipment above RMB 10,000 (US\$ 1424), number of equipment items valued above RMB  
24 10,000 (US\$ 1424), and number of equipment items valued RMB 500,000–690,000 (\$71,205–  
25 98263) in PHCs exhibited continual decreases. However, for the Theil indices of the health-care  
26 workforce in hospitals, reverse trends were observed in both the numbers of technicians and  
27 doctors during this period; for example, the index of technicians in hospitals decreased from 0.27  
28 in 2010 to 0.25 in 2013, followed by an increase to 0.33 in 2016; similarly, the index of doctors in  
29 hospitals exhibited the same trend, which demonstrated that the problem of inequality in health-  
30 care workforce allocation in hospitals had not been solved.  
31  
32  
33  
34  
35  
36  
37  
38  
39  
40

#### 41 **4. Discussion**

42 This study analyzed the temporal trends and inequality of health-resource allocation at the hospital  
43 and PHC levels in Shanghai, noting trends of improvements in the quantity and inequality in  
44 health-resource allocation from 2010 to 2016. However, various regions have an unbalanced  
45 distribution of health-care resources, especially equipment and health workforce in hospitals,  
46 which exhibited serious inequalities in either number or temporal trend.  
47  
48  
49  
50

51 First, this study observed that the number of technicians, number of doctors, total value of  
52 equipment above RMB 10,000 (US\$ 1424), number of equipment items valued above RMB  
53 10,000 (US\$ 1424) in hospitals and PHCs, number of equipment items valued above RMB  
54  
55  
56  
57

1  
2  
3 1,000,000 (US\$ 142,410) in hospitals, and number of equipment items valued RMB 500,000–  
4 690,000 (US\$ 71,205–98,263) in PHCs all increased over the 7 years. These results indicated that  
5 the Chinese government’s goals of reforming the healthcare system to operate smoothly and  
6 provide a safe, efficient, and convenient health service over past 7 years have been achieved. To  
7 expand and optimize health-care resources on the supply side, according to the “Healthy China  
8 2030” planning outline and other health policy plans, China has integrated health subsystems by  
9 investing financially in health institutions to purchase various types of equipment; recruit and train  
10 technicians and doctors; make health institutions function reoriented; update the health-care  
11 service model based on the state of public health; and present a collaborative hierarchical medical  
12 system that meets people’s health-care demands <sup>20–23</sup>. This included not only perfecting plans for  
13 the geographical distribution of health-care resources across different regions and districts <sup>24</sup> but  
14 also maintaining a dynamic balance in allocation between hospitals and PHCs. On the demand-  
15 side, the government has educated Chinese people about the “big health” concept to foster healthy  
16 lifestyles, as well as re-designed medical insurance to widen coverage among poorer people <sup>25</sup>,  
17 providing an increasing number of patients with reasonable access to health-care resources. Thus,  
18 the aforementioned measures of the Chinese and Shanghai governments have resulted in increased  
19 numbers of technicians, doctors, and equipment items across different institutions and varied  
20 districts, and also reduced the inequality in health-resource allocation from 2010 to 2016.  
21 Numerous studies have supported these results <sup>17,26–27</sup>.

22  
23  
24  
25  
26  
27  
28  
29  
30  
31  
32  
33  
34  
35  
36 Second, this study observed regional differences in health-resource distribution at the hospital  
37 and PHC levels from 2010 to 2016. Health programs were unbalanced in their development when  
38 hospitals and PHCs were compared, which resulted in an aberrant phenomenon named an  
39 “inverted triangle,” as opposed to an “equilateral triangle,” meaning that increasing numbers of  
40 technicians and doctors in PHCs have been attracted to tertiary and specialty public hospitals. This  
41 has caused losses in medical human resources in the PHCs. This has happened because of lower  
42 salaries and limited career advancement causing PHC doctors and nurses to leave to work at larger  
43 hospitals. Some relevant studies have also noted an “inverted triangle” <sup>5,28</sup>. Furthermore, more  
44 larger hospitals were distributed in urban districts than in rural ones, which led to increasing  
45 numbers of the health workforce being attracted from suburban to central districts. Additionally,  
46 suburban districts grew faster than urban ones did in terms of numbers of equipment items in  
47 hospitals and PHCs because—due to fewer health-care resources and the slower development of  
48  
49  
50  
51  
52  
53  
54  
55  
56  
57  
58  
59  
60

1  
2  
3 health institutions in rural areas—expanding the equipment in health institutions was urgent.  
4 Moreover, this goal was easier to achieve than quickly recruiting and training doctors and nurses  
5 was when the government invested significantly in Shanghai from 2009 onward. This result on the  
6 regional difference is similar to those of studies that discovered rapidly growing numbers of  
7 equipment items in suburban areas in China and an overcentralized health workforce in urban areas  
8  
9  
10  
11  
12 29–30.

13  
14 Third, this study used the Theil index to analyze inequality in health-resource allocation. The  
15 index has some disadvantages, such as being complex to calculate and interpret; a wide variety  
16 when distribution varies regardless of the change that occurs in the top, middle, or bottom tier of  
17 resources; and the fact that when comparing populations with different sizes, the calculation is  
18 dependent on the number of individuals in the population or group. Nonetheless, this measurement  
19 method can still be robust when determining inequality within and between group components,  
20 with high sensitivity to the efficiency of health-resource allocation. This is because the index is  
21 decomposable by groups, can incorporate group-level data, and is particularly effective at paring  
22 effects in hierarchical data sets<sup>31</sup>. This study confirmed the inequality among technicians, doctors,  
23 and equipment in hospitals from 2010 to 2016. On the one hand, hospitals had higher Theil indices  
24 than did PHCs in numbers of all health-care resources, especially equipment in Shanghai in every  
25 year, again demonstrating unbalanced distribution of health-care resources between hospitals and  
26 PHCs. This is attributable to the fact that with the rapid development of hospitals, many hospitals  
27 have profited and have thus continually invested in the recruitment and education of doctors and  
28 have bought large quantities of advanced medical equipment to meet the medical needs of an  
29 increasing number of patients. This has resulted in overinvestment in the health workforce and  
30 equipment, whereas PHCs have not invested enough in these health-care resources and cannot  
31 compete with hospitals because they have fewer patients and are less profitable. This result is  
32 consistent with the findings reported by Zhang T. et al.<sup>32</sup> and Wang YY. et al.<sup>26</sup>. On the other  
33 hand, the Theil indices of the health workforce in hospitals, such as technicians and doctors,  
34 increased during this period, indicating worsening inequality in health-resource allocation. The  
35 reason is that the elevated provision of human resources does not necessarily indicate a decline in  
36 inequity, as has been noted in other countries<sup>33–36</sup>. As mentioned, increasing numbers of  
37 technicians and doctors flow into larger urban hospitals from rural, new, or private hospitals for  
38 reasons of salary and career advancement. Another reason is that hospitals will compete for more  
39  
40  
41  
42  
43  
44  
45  
46  
47  
48  
49  
50  
51  
52  
53  
54  
55  
56  
57  
58  
59  
60

1  
2  
3 patients and profit because of the Matthew effect in the medical field, indicating that an increasing  
4 number of patients have been seeing doctors in famous tertiary or larger hospitals, and fewer  
5 patients trust doctors in nonfamous or small hospitals, leading to more human resources in health  
6 institutions pouring into larger hospitals, thereby further exacerbating the disparities between  
7 larger and smaller hospitals. This finding is similar to those of some relevant studies, which have  
8 confirmed the health workforce distribution gap among hospitals of various sizes<sup>37-39</sup>.

9  
10  
11  
12  
13 The present study has several limitations. First, the data used potentially only reflect the health-  
14 resource allocation status in Shanghai at the cut-off because we could only obtain them from the  
15 Chinese Yellowbooks, which are often published officially at least 2 years after the year the data  
16 were for; therefore, crucial information could have been omitted from our data. In the future, a  
17 new study on changes in health-resource allocation from 2017 to the present, along with  
18 comparisons with the present study, can be conducted when the data are available. Second, this  
19 study did not consider the effect of the population's health outcomes on health-resource allocation.  
20 According to the health capacity paradigm theory<sup>40</sup>, the population's health status in a region will  
21 have mutual effects on health-resource allocation in that area. Due to time and resource constraints,  
22 we did not consider these factors, which may have affected the results. Third, we selected  
23 indicators for health-resource allocation at different institutional levels rather than indicators of  
24 the quality of health services. Factors represented by other unmeasured indicators may have  
25 influenced the results. Thus, integrating the indicators of health-resource allocation used in this  
26 study with those of health service quality may yield more robust results in a future study.

## 27 28 29 30 31 32 33 34 35 36 37 38 **5. Conclusion**

39 Health-care resources increased and inequality in resource allocation decreased in Shanghai from  
40 2010 to 2016. This indicates the success of the measures taken by the Chinese government since  
41 its 2009 reforms, specifically with respect to technicians, doctors, and equipment in hospitals and  
42 PHCs. However, the distribution of health-care resources differed between urban and rural areas  
43 and between hospitals and other institutions. To achieve an institutional and regional balance in  
44 health-care resource distribution between central and rural areas, a comprehensive solution to raise  
45 wages and improve working conditions of health workers in PHCs and rural areas is required,  
46 which will prevent their excessive flow to hospitals and urban areas. This will prevent the inverted  
47 triangle from occurring and mitigate the institutional burden for the government. In addition,  
48 motivational efforts are required to cultivate and train more medical students to a high degree and  
49  
50  
51  
52  
53  
54  
55  
56  
57  
58  
59  
60

1  
2  
3 encourage them to work in rural areas. Policies should not only be focused on the imbalance in the  
4 health workforce distribution between larger urban hospitals and smaller ones—such as policies  
5 for raising salaries for doctors and nurses in small-scale suburban hospitals and implementing job  
6 performance evaluation reform in all hospitals—they should also be focused on reducing  
7 redundant equipment investments and health workforce disparity in hospitals—such as  
8 implementing cost-benefit analyses and input/output optimization as well as controlling the scale  
9 of operations in the trial reform of public hospitals. To more deeply explore health-resource  
10 allocation, future studies must be conducted that integrate the indicators used in the present study  
11 with indicators of health service quality.  
12  
13  
14  
15  
16  
17

### 18 **Contributor statement**

19 ED, HW, LC, TW and LZ designed the study together, acquired the data and developed the  
20 statistical plan. SL, MC and TX carried out the survey. HW and LC performed the statistical  
21 analysis. ED, TW and LZ interpreted the analysis. ED and LZ drafted and revised the manuscript.  
22 All authors read and approved the final manuscript.  
23  
24  
25  
26

### 27 **Competing interests None declared**

28  
29 **Funding** This research was funded National social Science Foundation of China General Project  
30 (Grant No. 18BGL242). The funders had no role in the question design, analysis or interpretation.  
31  
32

33 **Data sharing statement** Data are available upon reasonable request.  
34  
35

### 36 **References**

- 37  
38 1. i Casanovas GL, Rivera B, Currais L, editors. Health and economic growth: findings and policy  
39 implications. Mit Press, 2005.  
40  
41 2. Cutler DM, Lleras-Muney A, Vogl T. Socioeconomic status and health: dimensions and mechanisms.  
42 National Bureau of Economic Research 2008 ; Sep 10.  
43  
44 3. Culyer AJ, Wagstaff A. Equity and equality in health and health care. Journal  
45 of health economics 1993; 12(4): 431-57.  
46  
47 4. Shi Y, Na AN, Qian GU, Ming LI. The equity analysis of resource allocation of community health  
48 services in Shanghai. Chin Health Resour 2010; 06(13): 285-6.  
49  
50 5. Sun X, Zhang H, Hu X, et al. Measurement and analysis of equity in health: a case study conducted in  
51 Zhejiang Province. China Int J Equity Health 2018; 17(1): 36.  
52  
53 6. Kreng VB, Yang C. The equality of resource allocation in health care under the National Health Insurance  
54 System in Taiwan. Health Policy 2011; 100: 203-10.  
55  
56  
57  
58  
59  
60



- 1  
2  
3 7.Tao Y, Henry K, Zou Q, et al. Methods for measuring horizontal equity in health resource allocation: a  
4 comparative study. *Heal Econ Rev* 2014;4:1-10.
- 5  
6 8.Szalai J. Inequalities in access to health care in Hungary. *Social Science & Medicine* 1986; 22:135-40.
- 7  
8 9.Meng, Q., Yang, H., Chen, W., Sun, Q., & Liu, X. People's Republic of China Health System Review.  
9  
10 Health Systems in Transition 2015;5. Retrieved from  
11 [http://www.wpro.who.int/asia\\_pacific\\_observatory/hits/series/china\\_health\\_systems\\_review.pdf](http://www.wpro.who.int/asia_pacific_observatory/hits/series/china_health_systems_review.pdf)  
12 [http://www.wpro.who.int/asia\\_pacific\\_observatory/en/](http://www.wpro.who.int/asia_pacific_observatory/en/) (accessed 11 Feb 2020).
- 13  
14 10.XU Jing , JI Jie , ZHUANG Yue-hong , et al. Analysis on the community health resources and their  
15 distribution equity in Pudong New Area of Shanghai. *Chinese Health Resources* 2017; 20:8-10+23(in  
16 Chinese).
- 17  
18 11. JI Jie, LU Ye, WU Chun-feng, et al. Study on the human resource allocation of food safety system  
19 in district centers for disease control and prevention in Shanghai. *Chinese Health Resources* 2018;21:452-  
20 55(in Chinese).
- 21  
22 12. FAN Xin , ZHANG Dingyue , LI Xu , et al. Distribution equality of mental health facilities and  
23 psychiatric beds in Shanghai based on Theil index. *Chinese Mental Health Journal* 2018; 32):829-34(in  
24 Chinese).
- 25  
26 13.Wang S, Xu J, Jiang X, et al. Trends in health resource disparities in primary health care institutions in  
27 Liaoning Province in Northeast China. *International journal for equity in health* 2018;17:1-8.
- 28  
29 14. Sun J. Equality in the distribution of health material and human resources in Guangxi: evidence from  
30 Southern China. *BMC research notes* 2017 ;10:429.
- 31  
32 15. Sun J, Luo H. Evaluation on equality and efficiency of health resources allocation and health services  
33 utilization in China. *International journal for equity in health* 2017;16:127.
- 34  
35 16. Chen R, Zhao Y, Du J, Wu T, Huang Y, Guo A. Health workforce equity in urban community health  
36 service of China. *PLoS One* 2014 ;9:e115988.
- 37  
38 17. Pan J, Shallcross D. Geographic distribution of hospital beds throughout China: a county-level  
39 econometric analysis. *International journal for equity in health* 2016 ;15:179.
- 40  
41 18. Zhang Y, Wang Q, Jiang T, Wang J. Equity and efficiency of primary health care resource allocation  
42 in mainland China. *International journal for equity in health* 2018;17:140.
- 43  
44 19.Theil H. *Economic and information theory* North Holland Publish. Co.,Amsterdam,1967.
- 45  
46 20. KUANG Li. Strategy for optimizing the mechanism of healthcare competition: Establishing the vertical  
47 integrated healthcare delivery systems. *Chinese Journal of Health Policy* 2012;5:34-9(in Chinese).
- 48  
49 21. Zhao Dan-dan. the realty and preliminary analsis on medical resource and their vertical integration in  
50 Shanghai. *Chinese Health Resources* 2008;11:259-62(in Chinese).
- 51  
52  
53  
54  
55  
56  
57  
58  
59  
60

22. Iriart C, Merhy EE, Waitzkin H. Managed care in Latin America: the new common sense in health policy reform. *Social Science & Medicine* 2001;52:1243-53.
23. Barr DA: *Introduction to US Health Policy: the organization, financing, and delivery of health care in America*: JHU Press; 2016.
24. Ren Wenjie. The Path Selection of Medical Resource Optimizing Allocation. *Chinese Health Resources* 2014 ; 27:23-5(in Chinese).
25. Krugman P, Wells R. The health care crisis and what to do about it. *The New York Review of Books* 2006;53.
26. Wang YY, Liu WW, Han JJ. Equity of Health Resource Distribution in Primary Healthcare Institutions in China. *Chinese General Practice* 2017 ; 20:3451-56.
27. Zhang XJ, Zhu K. Equity in the Distribution of Human Resources for Health in China during 2004-2015. *Chinese General Practice* 2018; 21:82-7.
28. LI Yang, DUAN Guang-feng, XIONG Lin-ping. Analysis on equity of health resource allocation in Shanghai during 2012-2015. *Chinese Health Resources* 2017; 20:390-3(in Chinese).
29. Ma Y, Zhang L, Boswell M. Inequities in the allocation of medical resources in China's township health centers. *China Agricultural Economic Review* 2016;8:637-46.
30. ZHANG Ran , SUN Yong-guo , YIN Ai-tian. Equity of medical device configuration in township health clinics since new medical reform. *Chin J Public Health* 2017; 33:1236-8(in Chinese).
31. Tao Y, Henry K, Zou Q, Zhong X. Methods for measuring horizontal equity in health resource allocation: a comparative study. *Health economics review* 2014 Dec;4:10.
32. Zhang T, Xu Y, Ren J, et al. Inequality in the distribution of health resources and health services in China: hospitals versus primary care institutions. *International journal for equity in health* 2017;16:42.
33. Paraje G, Vásquez F. Health equity in an unequal country: the use of medical services in Chile. *International journal for equity in health* 2012 ;11:81.
34. Glorioso V, Subramanian SV. Equity in access to health care services in Italy. *Health services research* 2014 ;49:950-70.
35. Smith S, Normand C. Equity in health care: the Irish perspective. *Health Economics, Policy and Law* 2011;6:205-17.
36. Ghosh S. Equity in the utilization of healthcare services in India: evidence from National Sample Survey. *International journal of health policy and management* 2014;2:29
37. Shi L, Song K, Rane S, Sun X, Li H, Meng Q. Factors associated with job satisfaction by Chinese primary care providers. *Primary health care research & development* 2014;15:46-57.



- 1  
2  
3 38. LIU Liang, LUO Da, BI Chang-wei, CHEN Xin. Study on the Medical and Health Resource Allocation  
4 of Tianjin Based on Gini Coefficient and and Agglomeration Degree. Chinese Health Economics 2019;48-  
5 50(in Chinese).  
6  
7  
8 39. LU Jie,et.al. a comprehensive analysis on spatial agglomeration effect and inequality of health resource  
9 allocation in Gansu province.Chinese Journal of Health Statistics 2019;36:222-5(in Chinese).  
10  
11 40. Chakraborty R, Chakraborti C. India, health inequities, and a fair healthcare provision: A perspective  
12 from health capability. Journal of Human Development and Capabilities 2015;16:567-80.  
13  
14  
15  
16

17 Fig.1 Per 1000 doctors in health institutions across the districts from 2010 to 2016. (a) presents per 1000  
18 doctors in hospitals across the districts from 2010 to 2016;(b) presents per 1000 doctors in PHCs across the  
19 districts from 2010 to 2016  
20

21 Fig.2 The number of equipment above ¥ 10,000 (US\$ 1,424) per 1000 in health institutions from 2010 to  
22 2016 (a) presents the number of equipment above ¥ 10,000 (US\$ 1,424) per 1000 in hospitals from 2010 to  
23 2016;(b) presents the number of equipment above ¥ 10,000 (US\$ 1,424) per 1000 in PHCs from 2010 to 2016  
24  
25

26 Fig. 3 Trends of the Theil indexes for the health resource in health institutions from 2010 to 2016 (a)  
27 presents trends of the Theil indexes for the health resource in hospitals from 2010 to 2016;(b)  
28 presents trends of the Theil indexes for the health resource in PHCs from 2010 to 2016  
29  
30  
31  
32  
33  
34  
35  
36  
37  
38  
39  
40  
41  
42  
43  
44  
45  
46  
47  
48  
49  
50  
51  
52  
53  
54  
55  
56  
57  
58  
59  
60

(a)

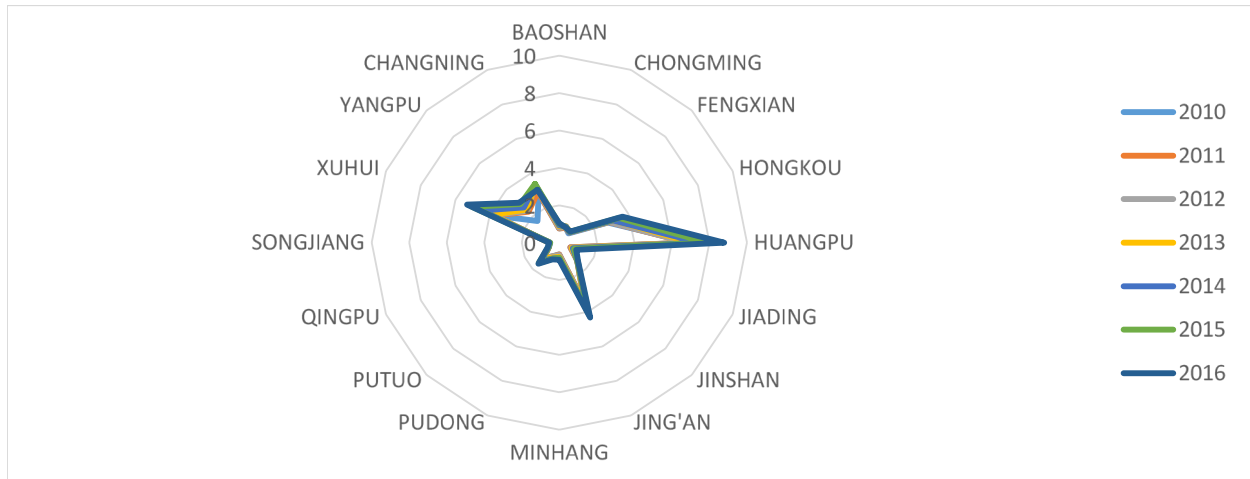

(b)

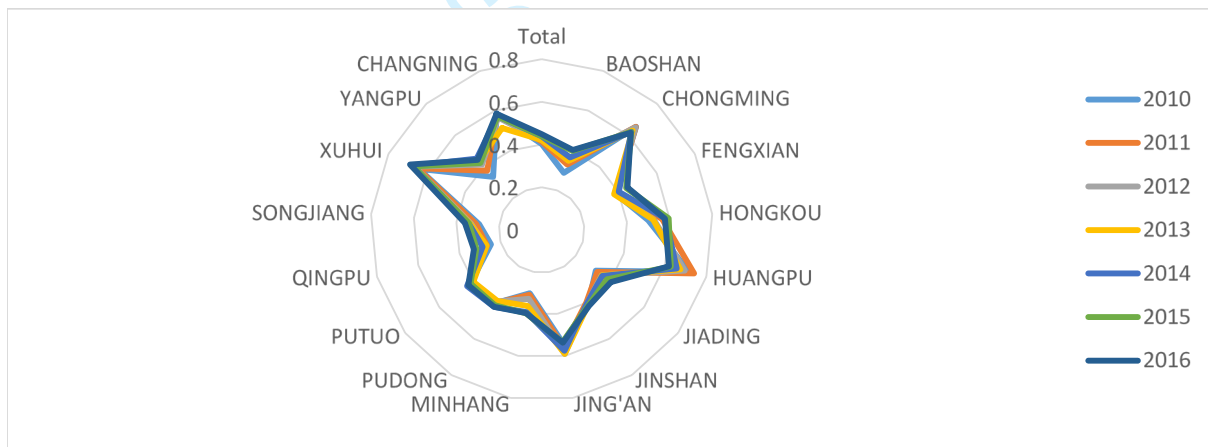

Fig.1 Per 1000 doctors in health institutions across the districts from 2010 to 2016. (a) presents per 1000 doctors in hospitals across the districts from 2010 to 2016;(b) presents per 1000 doctors in PHCs across the districts from 2010 to 2016

(a)

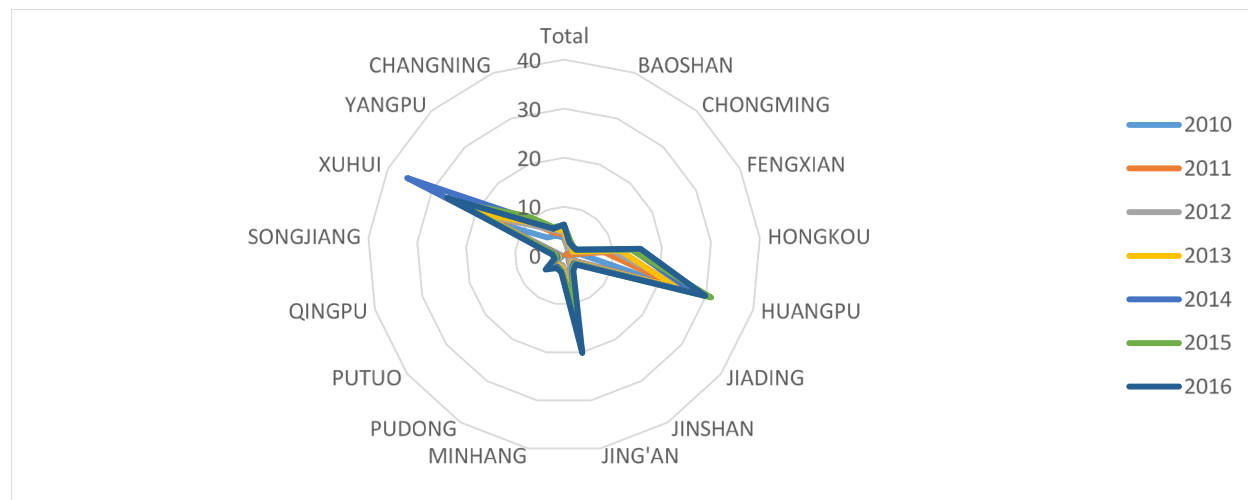

(b)

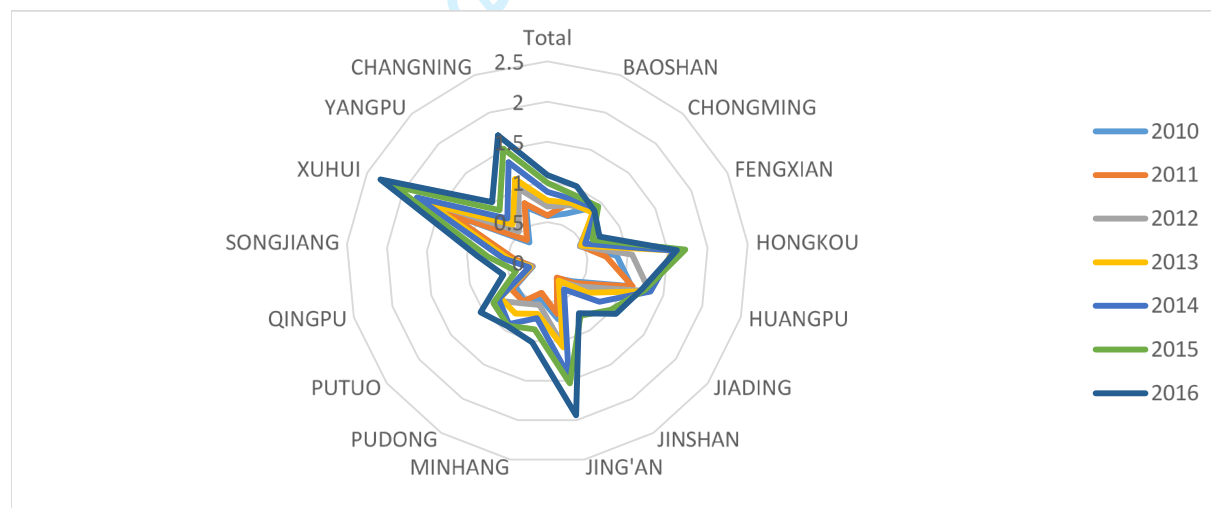

Fig.2 The number of equipment above ¥ 10,000 (US\$ 1,424) per 1000 in health institutions from 2010 to 2016 (a) presents the number of equipment above ¥ 10,000 (US\$ 1,424) per 1000 in hospitals from 2010 to 2016;(b) presents the number of equipment above ¥ 10,000 (US\$ 1,424) per 1000 in PHCs from 2010 to 2016

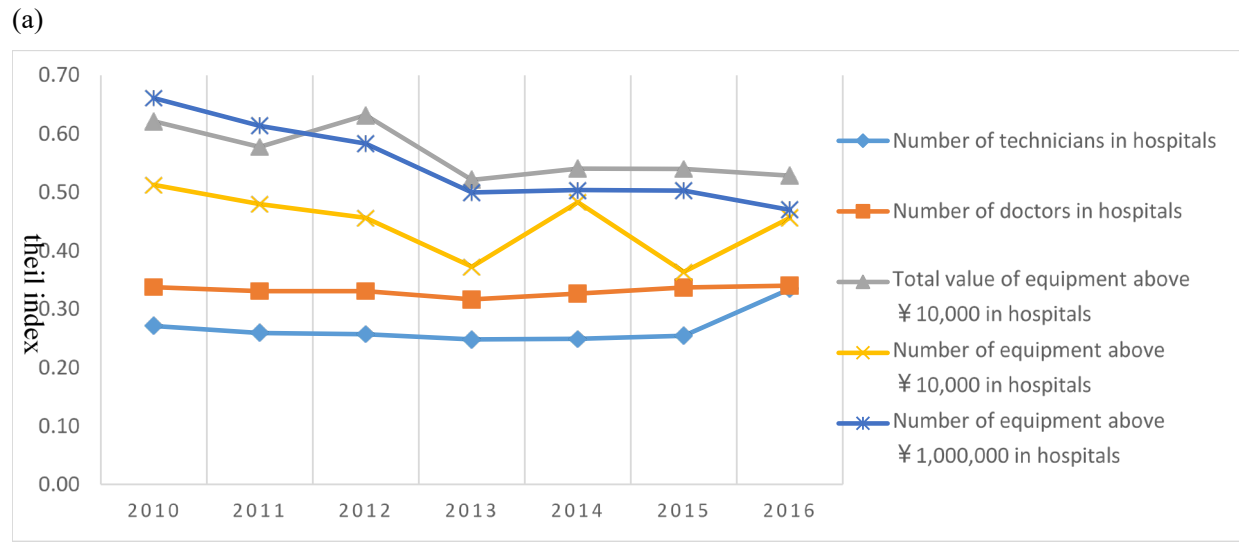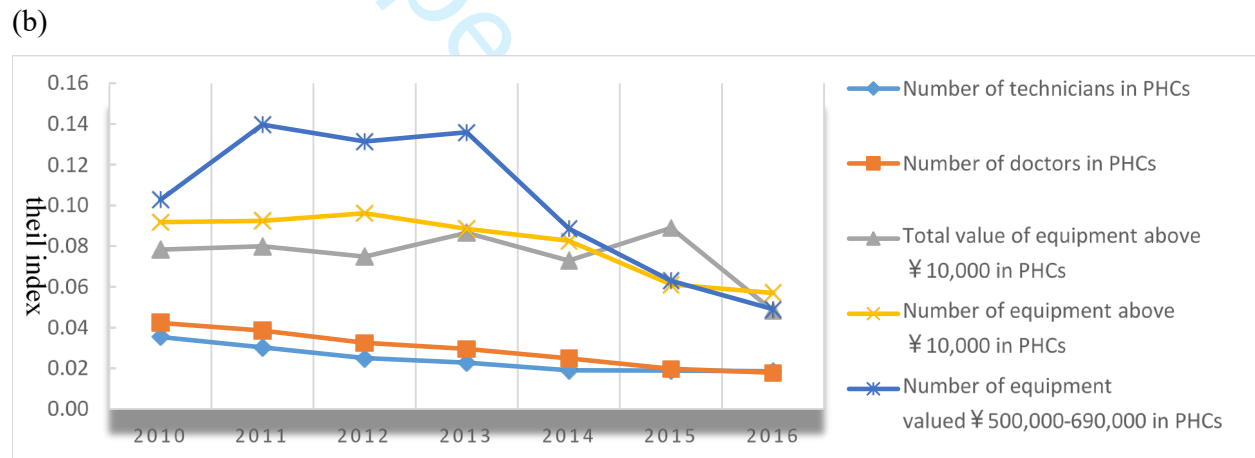

Fig. 3 Trends of the Theil indexes for the health resource in health institutions from 2010 to 2016  
 (a) presents trends of the Theil indexes for the health resource in hospitals from 2010 to 2016;(b)  
 presents trends of the Theil indexes for the health resource in PHCs from 2010 to 2016

Appendix 1

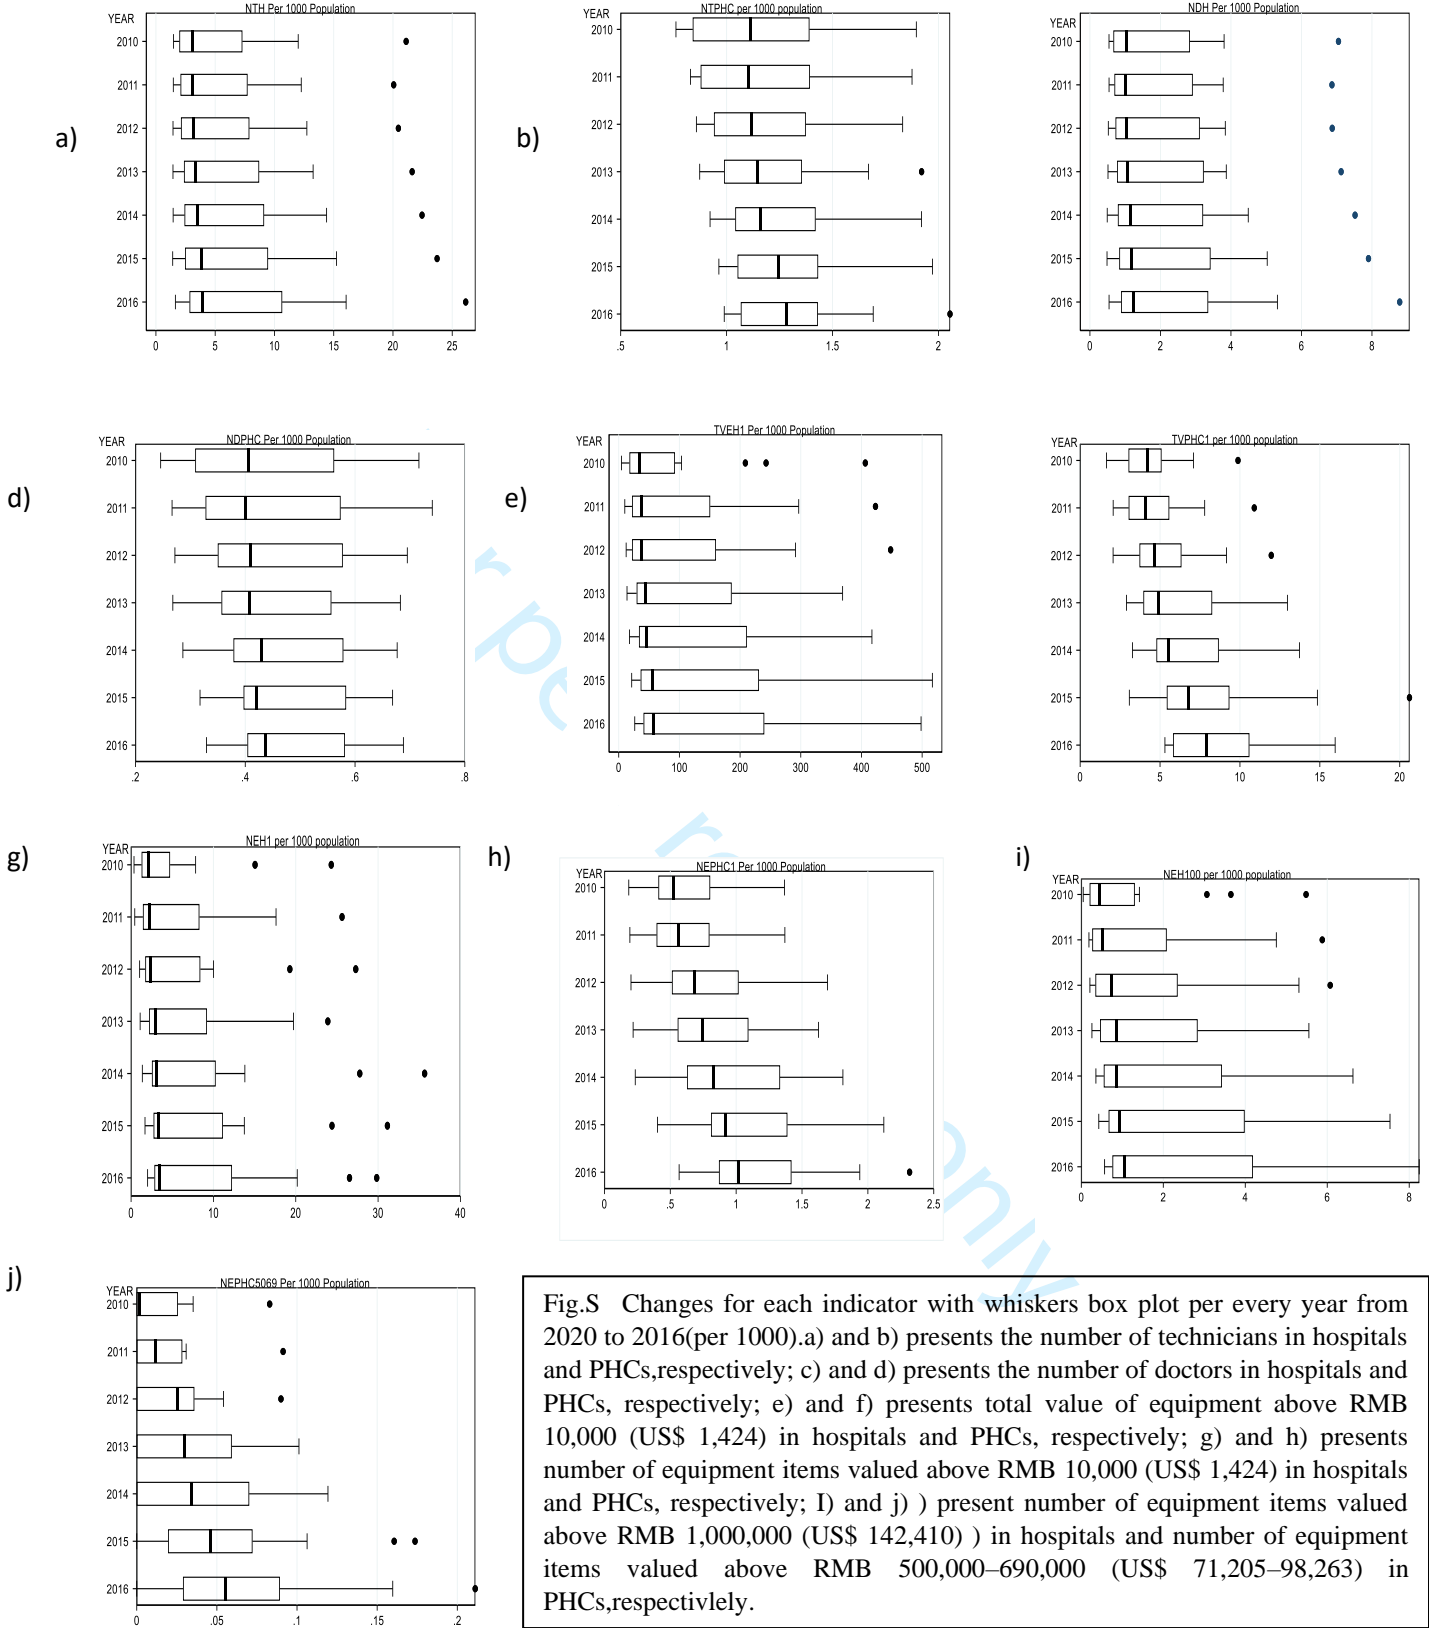

Fig.S Changes for each indicator with whiskers box plot per every year from 2010 to 2016(per 1000).a) and b) presents the number of technicians in hospitals and PHCs, respectively; c) and d) presents the number of doctors in hospitals and PHCs, respectively; e) and f) presents total value of equipment above RMB 10,000 (US\$ 1,424) in hospitals and PHCs, respectively; g) and h) presents number of equipment items valued above RMB 1,000,000 (US\$ 142,410) in hospitals and PHCs, respectively; i) and j) present number of equipment items valued above RMB 500,000–690,000 (US\$ 71,205–98,263) in PHCs, respectively.

1  
2  
3  
4  
5  
6  
7  
8  
9  
10  
11  
12  
13  
14  
15  
16  
17  
18  
19  
20  
21  
22  
23  
24  
25  
26  
27  
28  
29  
30  
31  
32  
33  
34  
35  
36  
37  
38  
39  
40  
41  
42  
43  
44  
45  
46  
47  
48  
49  
50  
51  
52  
53  
54  
55  
56  
57  
58  
59  
60

## STROBE Statement—checklist of items that should be included in reports of observational studies

|                          | Item No | Recommendation                                                                                                                                                                                                                                                                                                                                                                                                                                                         | Noted         |
|--------------------------|---------|------------------------------------------------------------------------------------------------------------------------------------------------------------------------------------------------------------------------------------------------------------------------------------------------------------------------------------------------------------------------------------------------------------------------------------------------------------------------|---------------|
| Title and abstract       | 1       | (a) Indicate the study's design with a commonly used term in the title or the abstract                                                                                                                                                                                                                                                                                                                                                                                 | Page1         |
|                          |         | (b) Provide in the abstract an informative and balanced summary of what was done and what was found                                                                                                                                                                                                                                                                                                                                                                    | Page1-2       |
| <b>Introduction</b>      |         |                                                                                                                                                                                                                                                                                                                                                                                                                                                                        |               |
| Background/rationale     | 2       | Explain the scientific background and rationale for the investigation being reported                                                                                                                                                                                                                                                                                                                                                                                   | Page 3-4      |
| Objectives               | 3       | State specific objectives, including any prespecified hypotheses                                                                                                                                                                                                                                                                                                                                                                                                       | Page4         |
| <b>Methods</b>           |         |                                                                                                                                                                                                                                                                                                                                                                                                                                                                        |               |
| Study design             | 4       | Present key elements of study design early in the paper                                                                                                                                                                                                                                                                                                                                                                                                                | Page4-5       |
| Setting                  | 5       | Describe the setting, locations, and relevant dates, including periods of recruitment, exposure, follow-up, and data collection                                                                                                                                                                                                                                                                                                                                        | Page5-6       |
| Participants             | 6       | (a) <i>Cohort study</i> —Give the eligibility criteria, and the sources and methods of selection of participants. Describe methods of follow-up<br><i>Case-control study</i> —Give the eligibility criteria, and the sources and methods of case ascertainment and control selection. Give the rationale for the choice of cases and controls<br><i>Cross-sectional study</i> —Give the eligibility criteria, and the sources and methods of selection of participants | No applicable |
|                          |         | (b) <i>Cohort study</i> —For matched studies, give matching criteria and number of exposed and unexposed<br><i>Case-control study</i> —For matched studies, give matching criteria and the number of controls per case                                                                                                                                                                                                                                                 | No applicable |
| Variables                | 7       | Clearly define all outcomes, exposures, predictors, potential confounders, and effect modifiers. Give diagnostic criteria, if applicable                                                                                                                                                                                                                                                                                                                               | Page4-5       |
| Data sources/measurement | 8*      | For each variable of interest, give sources of data and details of methods of assessment (measurement). Describe comparability of assessment methods if there is more than one group                                                                                                                                                                                                                                                                                   | Page4-6       |
| Bias                     | 9       | Describe any efforts to address potential sources of bias                                                                                                                                                                                                                                                                                                                                                                                                              | Page14        |
| Study size               | 10      | Explain how the study size was arrived at                                                                                                                                                                                                                                                                                                                                                                                                                              | Page5-6       |
| Quantitative variables   | 11      | Explain how quantitative variables were handled in the analyses. If applicable, describe which groupings were chosen and why                                                                                                                                                                                                                                                                                                                                           | Page5         |
| Statistical methods      | 12      | (a) Describe all statistical methods, including those used to control for confounding                                                                                                                                                                                                                                                                                                                                                                                  | Page6         |
|                          |         | (b) Describe any methods used to examine subgroups and interactions                                                                                                                                                                                                                                                                                                                                                                                                    | Page6         |

|  |                                                                                                                                                                                                                                                                                                           |               |
|--|-----------------------------------------------------------------------------------------------------------------------------------------------------------------------------------------------------------------------------------------------------------------------------------------------------------|---------------|
|  | (c) Explain how missing data were addressed                                                                                                                                                                                                                                                               | No applicable |
|  | (d) <i>Cohort study</i> —If applicable, explain how loss to follow-up was addressed<br><i>Case-control study</i> —If applicable, explain how matching of cases and controls was addressed<br><i>Cross-sectional study</i> —If applicable, describe analytical methods taking account of sampling strategy |               |
|  | (e) Describe any sensitivity analyses                                                                                                                                                                                                                                                                     | No applicable |

Continued on next page

For peer review only

1  
2  
3  
4  
5  
6  
7  
8  
9  
10  
11  
12  
13  
14  
15  
16  
17  
18  
19  
20  
21  
22  
23  
24  
25  
26  
27  
28  
29  
30  
31  
32  
33  
34  
35  
36  
37  
38  
39  
40  
41  
42  
43  
44  
45  
46  
47  
48  
49  
50  
51  
52  
53  
54  
55  
56  
57  
58  
59  
60

1  
2  
3  
4  
5  
6  
7  
8  
9  
10  
11  
12  
13  
14  
15  
16  
17  
18  
19  
20  
21  
22  
23  
24  
25  
26  
27  
28  
29  
30  
31  
32  
33  
34  
35  
36  
37  
38  
39  
40  
41  
42  
43  
44  
45  
46  
47  
48  
49  
50  
51  
52  
53  
54  
55  
56  
57  
58  
59  
60

| <b>Results</b>           |     |                                                                                                                                                                                                              |                      |
|--------------------------|-----|--------------------------------------------------------------------------------------------------------------------------------------------------------------------------------------------------------------|----------------------|
| Participants             | 13* | (a) Report numbers of individuals at each stage of study—eg numbers potentially eligible, examined for eligibility, confirmed eligible, included in the study, completing follow-up, and analysed            | Page7-8              |
|                          |     | (b) Give reasons for non-participation at each stage                                                                                                                                                         | No applicable        |
|                          |     | (c) Consider use of a flow diagram                                                                                                                                                                           | No applicable        |
| Descriptive data         | 14* | (a) Give characteristics of study participants (eg demographic, clinical, social) and information on exposures and potential confounders                                                                     | Page7                |
|                          |     | (b) Indicate number of participants with missing data for each variable of interest                                                                                                                          | No applicable        |
|                          |     | (c) <i>Cohort study</i> —Summarise follow-up time (eg, average and total amount)                                                                                                                             | No applicable        |
| Outcome data             | 15* | <i>Cohort study</i> —Report numbers of outcome events or summary measures over time                                                                                                                          | <i>No applicable</i> |
|                          |     | <i>Case-control study</i> —Report numbers in each exposure category, or summary measures of exposure                                                                                                         | <i>No applicable</i> |
|                          |     | <i>Cross-sectional study</i> —Report numbers of outcome events or summary measures                                                                                                                           | <i>Page7-11</i>      |
| Main results             | 16  | (a) Give unadjusted estimates and, if applicable, confounder-adjusted estimates and their precision (eg, 95% confidence interval). Make clear which confounders were adjusted for and why they were included | No applicable        |
|                          |     | (b) Report category boundaries when continuous variables were categorized                                                                                                                                    | No applicable        |
|                          |     | (c) If relevant, consider translating estimates of relative risk into absolute risk for a meaningful time period                                                                                             | No applicable        |
| Other analyses           | 17  | Report other analyses done—eg analyses of subgroups and interactions, and sensitivity analyses                                                                                                               | No applicable        |
| <b>Discussion</b>        |     |                                                                                                                                                                                                              |                      |
| Key results              | 18  | Summarise key results with reference to study objectives                                                                                                                                                     | Page12               |
| Limitations              | 19  | Discuss limitations of the study, taking into account sources of potential bias or imprecision. Discuss both direction and magnitude of any potential bias                                                   | Page14               |
| Interpretation           | 20  | Give a cautious overall interpretation of results considering objectives, limitations, multiplicity of analyses, results from similar studies, and other relevant evidence                                   | Page11-14            |
| Generalisability         | 21  | Discuss the generalisability (external validity) of the study results                                                                                                                                        | Page15               |
| <b>Other information</b> |     |                                                                                                                                                                                                              |                      |
| Funding                  | 22  | Give the source of funding and the role of the funders for the present study and, if applicable, for the original study on which the present article is based                                                | <b>Page15</b>        |

\*Give information separately for cases and controls in case-control studies and, if applicable, for exposed and unexposed groups in cohort and cross-sectional studies.



1  
2  
3 **Note:** An Explanation and Elaboration article discusses each checklist item and gives methodological background and  
4 published examples of transparent reporting. The STROBE checklist is best used in conjunction with this article (freely  
5 available on the Web sites of PLoS Medicine at <http://www.plosmedicine.org/>, Annals of Internal Medicine at  
6 <http://www.annals.org/>, and Epidemiology at <http://www.epidem.com/>). Information on the STROBE Initiative is  
7 available at [www.strobe-statement.org](http://www.strobe-statement.org).  
8  
9  
10  
11  
12  
13  
14  
15  
16  
17  
18  
19  
20  
21  
22  
23  
24  
25  
26  
27  
28  
29  
30  
31  
32  
33  
34  
35  
36  
37  
38  
39  
40  
41  
42  
43  
44  
45  
46  
47  
48  
49  
50  
51  
52  
53  
54  
55  
56  
57  
58  
59  
60
