# Supplementary figures and images for: Differences in regional distribution and inequality in health-resource allocation at hospital and primary health centre levels: a longitudinal study in Shanghai, China
Source: PubMed Central journal article supplement — BMJ Open. 2020 Jul 19;10(7):e035635. doi: 10.1136/bmjopen-2019-035635 (PMC7371131; doi:10.1136/bmjopen-2019-035635), 2020-07-19

## Appendix 1

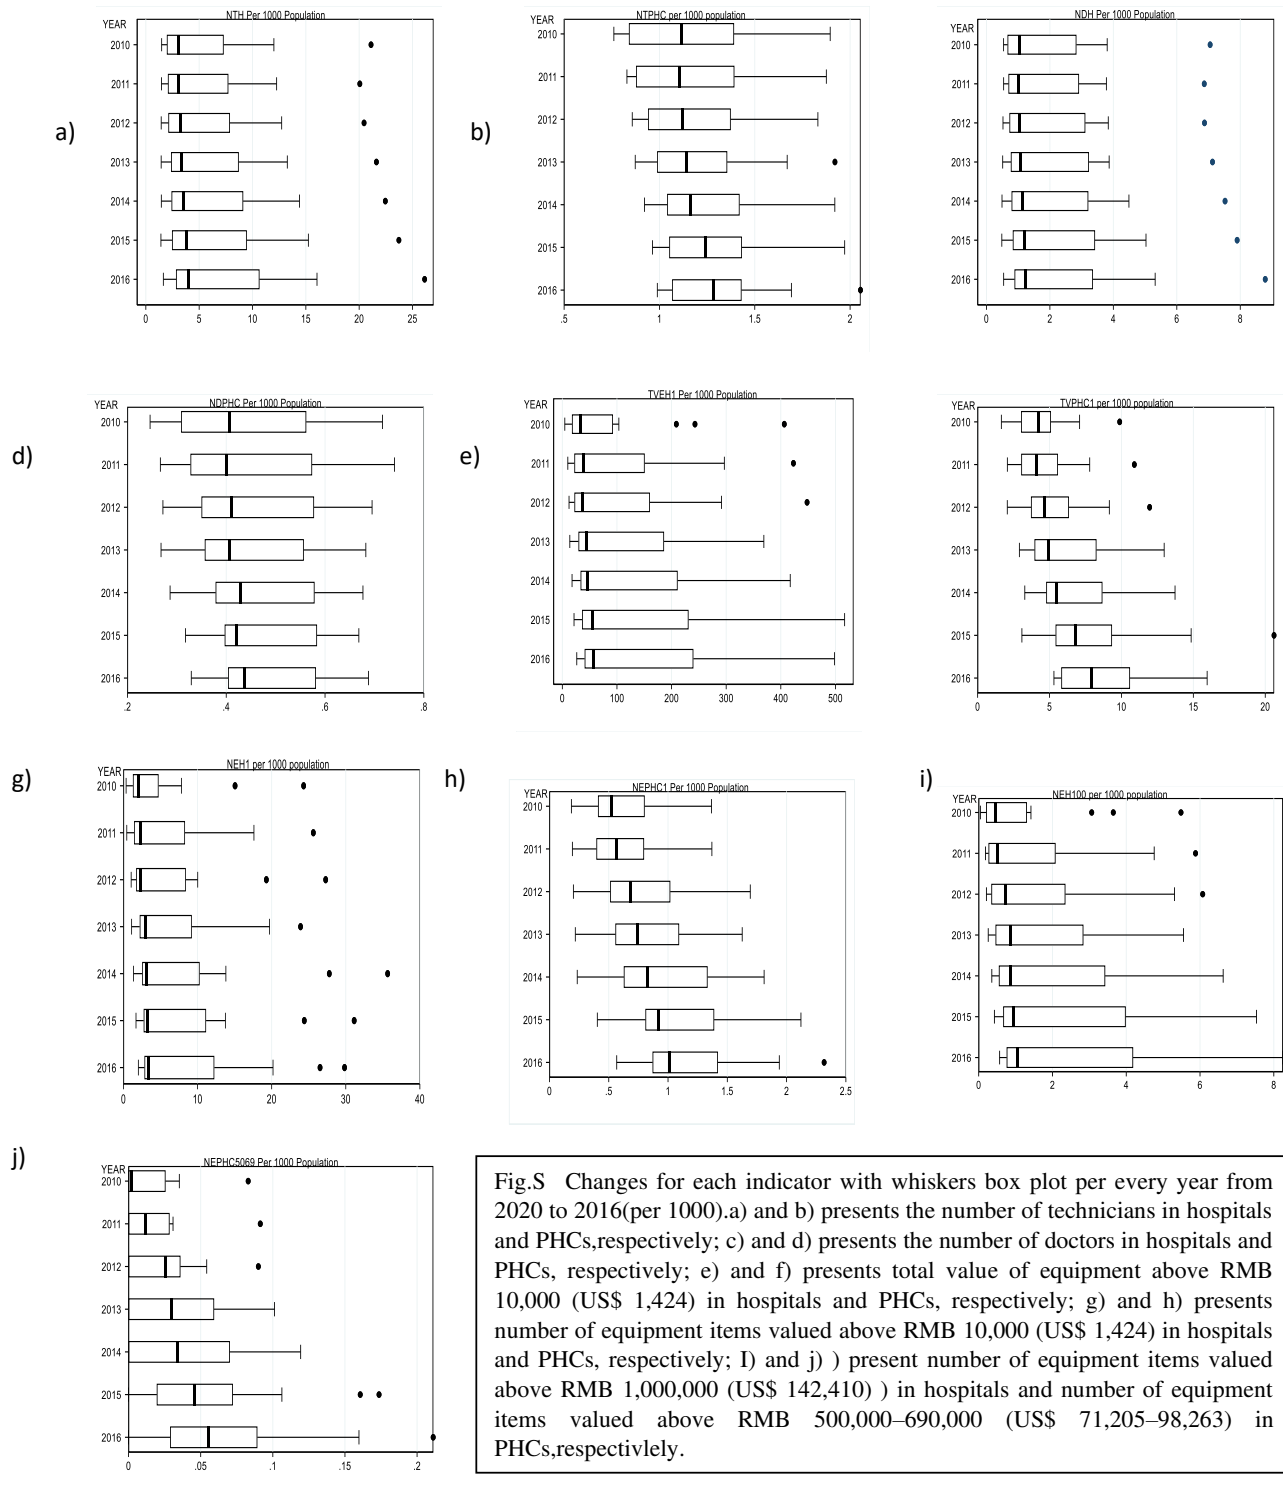

Supplement: bmjopen-2019-035635supp001.pdf [file bmjopen-2019-035635supp001.pdf]
